1 **Gene fate spectrum as a reflection of local genomic properties**

2

3

4 Yuichiro Hara<sup>1\*</sup> and Shigehiro Kuraku<sup>2,3,4</sup>

5

6 <sup>1</sup>Research Center for Genome & Medical Sciences, Tokyo Metropolitan Institute of  
7 Medical Science, Japan

8 <sup>2</sup>Molecular Life History Laboratory, Department of Genomics and Evolutionary  
9 Biology, National Institute of Genetics, Japan

10 <sup>3</sup>Department of Genetics, Sokendai (Graduate University for Advanced Studies), Japan

11 <sup>4</sup>Laboratory for Phyloinformatics Team, RIKEN Center for Biosystems Dynamics  
12 Research (BDR), Japan

13

14 \*Correspondence: [hara-yi@igakuken.or.jp](mailto:hara-yi@igakuken.or.jp)

15

16 **Abstract**

17 Functionally indispensable genes are likely to be retained and otherwise to be lost  
18 during evolution. This evolutionary fate of a gene can also be affected by neutral  
19 factors, including the mutability of genomic positions, but such features have not been  
20 examined well. To uncover the genomic features associated with gene loss, we  
21 investigated the characteristics of genomic regions where genes have been  
22 independently lost in multiple lineages. With a comprehensive scan of gene phylogenies  
23 of vertebrates with a careful inspection of evolutionary gene losses, we identified 1,081  
24 human genes whose orthologs were lost in multiple mammalian lineages: designated  
25 ‘elusive genes.’ These elusive genes were located in genomic regions with rapid  
26 nucleotide substitution, high GC content, and high gene density. A comparison of the  
27 orthologous regions of such elusive genes across vertebrates revealed that these features  
28 had been established before the radiation of the extant vertebrates more than 500 million  
29 years ago. The association of human elusive genes with transcriptomic and epigenomic  
30 characteristics illuminated that the genomic regions containing such genes were subject  
31 to repressive transcriptional regulation. Thus, the heterogeneous genomic features  
32 driving gene fates toward loss have been in place since the ancestral vertebrates and  
33 may sometimes have relaxed the functional indispensability of such genes.

34

## 35 **Introduction**

36 In the course of evolution, genomes continue to retain most genes with occasional  
37 duplications, while losing some genes. This retention and loss can be interpreted as gene  
38 fate; genes are stably retained in the genome, but some factors may cause them to  
39 transition to a state where deletion occurs. Accordingly, identification of the factors  
40 allowing gene loss may facilitate our understanding of gene fate. Gene retention or loss  
41 has generally been considered to depend largely on the functional importance of the  
42 particular gene from the perspective of molecular evolutionary biology (Albalat and  
43 Cañestro, 2016; Bartha et al., 2018; Blanc et al., 2012; Liu et al., 2015; Olson, 1999;  
44 Sharma et al., 2018; Shen et al., 2018). Genes with indispensable functions have usually  
45 been retained with highly conserved sequences in genomes, through rapid elimination  
46 of alleles that impair gene functions (Hirsh and Fraser, 2001; Krylov et al., 2003;  
47 Miyata et al., 1980; Pál et al., 2006). However, genes with less important functions are  
48 likely to accept more mutations and structural variations, which can degrade the original  
49 functions, leading to gene loss through pseudogenization or genomic deletion (Jordan et  
50 al., 2002; Yang et al., 2003). To date, gene loss has been imputed to the relaxation of  
51 functional constraints of individual genes. Gene loss has further been revealed to drive  
52 phenotypic adaptation in various organisms (Albalat and Cañestro, 2016; Olson, 1999),  
53 as well as in a gene knockout collection of yeasts in culture (Giaever and Nislow, 2014;  
54 Maclean et al., 2017).

55 To uncover the association between fates and functional importance of the  
56 genes, molecular evolutionary analyses have been conducted at various scales, from  
57 gene-by-gene to genome-wide. A number of studies have revealed that the genes with  
58 reduced non-synonymous substitution rates (or  $K_A$  values) and ratios of non-

59 synonymous to synonymous substitution rates ( $K_A/K_S$  ratios) are less likely to be lost  
60 (Jordan et al., 2002; Yang et al., 2003). A genome-wide comparison of duplicated genes  
61 in yeast revealed larger  $K_A$  values for those lost in multiple lineages than those retained  
62 by all the species investigated (Byrne and Wolfe, 2007). Other comprehensive studies  
63 of gene loss across metazoans and teleosts revealed that the genes expressed in the  
64 central nervous system are less prone to loss (Fernández and Gabaldón, 2020; Roux et  
65 al., 2017). These observations again suggest that gene fate depends on the functional  
66 constraints of a particular gene.

67 Besides functional constraints, several studies have identified the genes lost  
68 independently in multiple lineages, revealing that the genomic regions containing these  
69 genes ‘prefer’ particular characteristics associated with structural instability (Cortez et  
70 al., 2014; Hughes et al., 2012; Lewin et al., 2021; Maeso et al., 2016). In mammals,  
71 tandemly arrayed homeobox genes derived from the Crx gene family were lost in  
72 multiple species (Lewin et al., 2021; Maeso et al., 2016). The findings suggest that  
73 genomic features containing tandem duplications facilitate unequal crossing over,  
74 leading to frequent gene loss. Mammalian chromosome Y, which contains abundant  
75 repetitive elements and continues to reduce in size, has lost a considerable number of  
76 genes (Cortez et al., 2014; Hughes et al., 2012). Genes in such particular genomic  
77 regions may be prone to loss in a more neutral manner than the relaxation of functional  
78 importance or via functional adaptations. Accordingly, these studies focusing on the  
79 particular genomic regions led us to search for the common features in genomes that  
80 potentially facilitate gene loss. Genome-wide scans have revealed heterogeneous  
81 distributions of a variety of sequence and structural features so far, for example, base  
82 composition (Bernardi and Bernardi, 1986; Cohen et al., 2005; Katzman et al., 2011),



83 the frequency of repetitive elements (Korenberg and Rykowski, 1988; Medstrand et al.,  
84 2002), and DNA-damage sensitivity induced by replication inhibitors (Debatisse et al.,  
85 2012; Helmrich et al., 2006). However, the extent to which these characteristics are  
86 associated with gene fates has not been understood well at a genome-wide level.  
87 The accumulation of near-complete genome assemblies for various organisms facilitates  
88 comprehensive taxon-wide analysis of gene loss (Fernández and Gabaldón, 2020;  
89 Guijarro-Clarke et al., 2020; Rice and McLysaght, 2017). Along with this motivation,  
90 we recently performed a comprehensive analysis on the fate of paralogs generated via  
91 the two-round whole genome duplications in early vertebrates (Hara et al., 2018a). The  
92 results revealed that the genes retained by reptiles but lost in mammals and Aves rapidly  
93 accumulated not only non-synonymous but also synonymous substitutions in  
94 comparison with the counterparts retained by almost all the vertebrates examined,  
95 indicating that those genes prone to loss harbor rapid mutation rates. Furthermore, these  
96 loss-prone genes were located in genomic regions with high GC-contents, high gene  
97 densities, and high repetitive element frequencies. These findings suggest that the fates  
98 of those genes are influenced not only by functional constraints but also by intrinsic  
99 genomic characteristics. Because the findings were restricted to a set of particular genes,  
100 they prompted us to examine whether this trend is associated with gene fates on a  
101 genome-wide scale.

102 In this study, we inferred molecular phylogenies of vertebrate orthologs to  
103 systematically search for the genes harboring different fates in the human genome. We  
104 referred to the loss-prone genes as ‘elusive’ genes that were retained by modern humans  
105 but were lost independently in multiple mammalian lineages. As a comparison of the  
106 elusive genes, we retrieved the ‘non-elusive’ genes that were retained by almost all of

107 the mammalian species examined. We conducted a careful search for gene loss to  
108 reduce the false discovery rate, which is usually caused by incomplete sequence  
109 information (Botero-Castro et al., 2017; Deutekom et al., 2019). By comparing the  
110 genomic regions containing these genes, we uncovered genomic characteristics relevant  
111 to gene loss. We associated the elusive genes with a variety of findings from deep  
112 sequencing analyses of the human genome including transcriptomics, epigenomics, and  
113 genetic variations. These data assisted us to understand how intrinsic features of  
114 genomes—presumably unrelated to gene function, may affect gene fate, leading to loss  
115 by relaxing the functional importance of ‘elusive’ genes.

116

## 117 **Results**

### 118 *Identification of human ‘elusive’ genes*

119 We defined an ‘elusive’ gene as a human protein-coding gene that existed in the  
120 common mammalian ancestors but was lost independently in multiple mammalian  
121 lineages (Figure 1; see Methods for details). In our analysis, we searched for such genes  
122 by reconstructing phylogenetic trees of vertebrate orthologs and detecting gene loss  
123 events within the individual trees. To search for elusive genes, we paid close attention  
124 to distinguishing true evolutionary gene loss from falsely inferred gene loss caused by  
125 insufficient genome assembly, gene prediction, and orthologous clustering (Botero-  
126 Castro et al., 2017; Deutekom et al., 2019), as described below.

127 We first produced highly complete orthologous groups comprised of nearly  
128 complete gene sets. We merged multiple gene annotations of a single species followed  
129 by assessments of the completeness of the gene sets (Figure 1a). Using these gene sets,  
130 we then created two sets of ortholog groups with different methods and merged them

131 into a single set (Figure 1a). In searching for gene loss events, we restricted our study to  
132 those that occurred in the common ancestors of particular ‘higher’ taxa. This procedure  
133 relieved false identifications of gene loss in a species or an ancestor of a lower  
134 taxonomic hierarchy caused by incomplete genomic information (Figure 1b).  
135 We integrated gene annotations from Ensembl, RefSeq, and the sequence repositories of  
136 individual genome sequencing projects to produce gene annotations for 114 mammalian  
137 and 132 non-mammalian vertebrates. From these, we selected the annotations of 101  
138 and 90 species, respectively, that exhibited high completeness in the BUSCO  
139 assessment (Simão et al., 2015) (Supplementary Table S1). Using these gene sets,  
140 ortholog clustering was conducted by OrthoFinder, and these ortholog groups were  
141 integrated into the ones provided by the Ensembl Gene Tree. This integration resulted in  
142 50,768 vertebrate ortholog groups. Phylogenetic tree inference of the integrated  
143 ortholog groups and pruning of the individual trees based on gene duplications resulted  
144 in 17,495 mammalian ortholog groups that contained human genes. For the individual  
145 mammalian ortholog groups, we searched for family or ‘higher’ taxonomic groups  
146 (listed in Supplementary Table S1) in which the gene was absent in all the species  
147 examined (Figure 1b). We interpreted this gene absence as an evolutionary loss that  
148 occurred in the common ancestor of the taxon. Finally, we extracted the ortholog groups  
149 that were retained by humans but were lost independently in the common ancestors of at  
150 least two taxa (Figure 1c). Hereafter we call the human genes belonging to these  
151 ortholog groups ‘elusive genes.’ To compare these, we also selected the ortholog groups  
152 that contained all of the mammals examined including single-copy human genes. We  
153 called these ‘non-elusive genes.’ This comprehensive scan of gene phylogenies resulted  
154 in 1,081 elusive and 8,050 non-elusive genes (Supplementary Table S2).

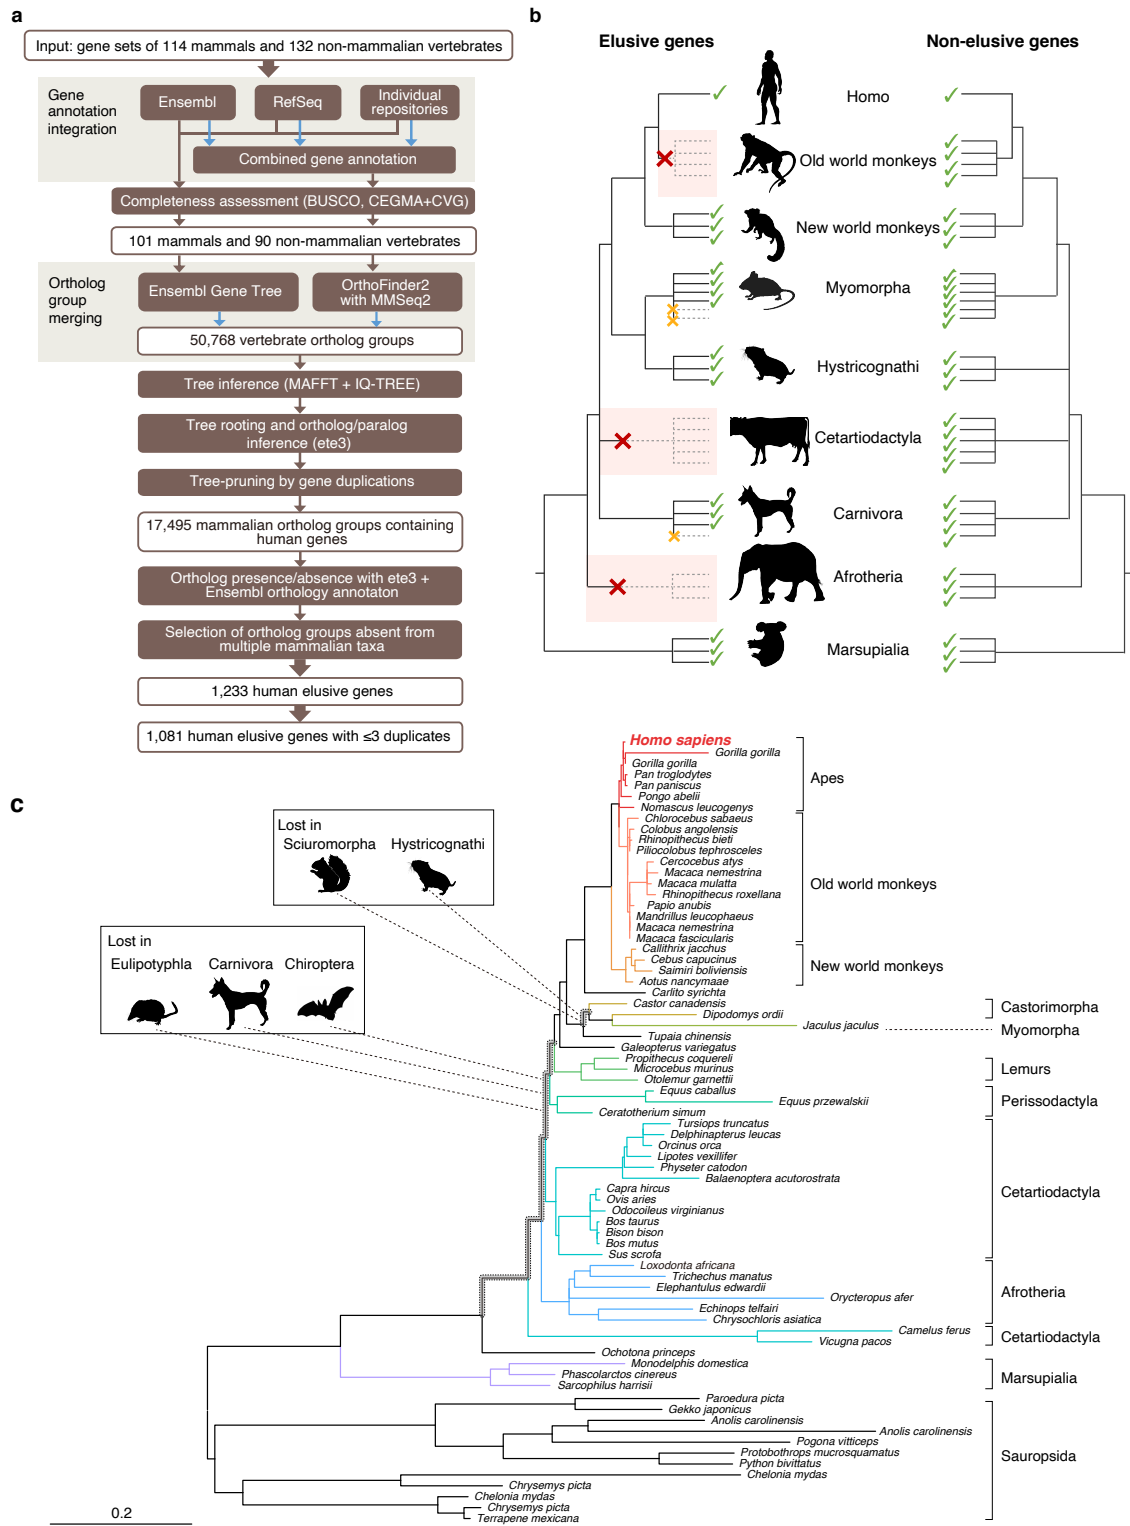

156 **Figure 1. Detection of ‘elusive’ genes**

157 (a) Pipeline of ortholog group clustering and gene loss detection. (b) Definition of an  
158 elusive gene schematized with ortholog presence/absence pattern referring to a ‘higher’  
159 taxonomic hierarchy. (c) A representative phylogeny of the elusive gene encoding  
160 Chitinase 3-like 2 (CHI3L2). Taxa shown in the tree were used to investigate the  
161 presence or absence of orthologs. The Sciuomorpha, Hystricognathi, Eulipotyphla,  
162 Carnivora, and Chiroptera are absent from the tree, indicating that the CHI3L2  
163 orthologs were lost somewhere along the branches framed in gray in the tree. In  
164 addition, the orthologs of many members of the Myomorpha were not found, suggesting  
165 that gene loss occurred in this lineage.

166 *Genomic signatures of the human elusive genes*

167 The loss-prone nature of the elusive genes suggests a relaxation of their functional  
168 constraints. To uncover the molecular evolutionary characteristics associated with each  
169 elusive gene, we computed synonymous and non-synonymous substitution rates,  
170 namely  $K_S$  and  $K_A$  values, respectively, between human and chimpanzee and mouse  
171 orthologs for the elusive and non-elusive genes. The results showed larger  $K_A$  values in  
172 the ortholog pairs of the elusive genes than in those of the non-elusive genes (Figure 2a;  
173 Figure 2–figure supplement 1). This indicates rapid accumulation of amino acid  
174 substitutions in the elusive genes, potentially accompanied by the relaxation of  
175 functional constraints. Our analysis further illuminated larger  $K_S$  values for the elusive  
176 genes than in the non-elusive genes (Figure 2b; Figure 2–figure supplement 1).  
177 Importantly, the abundance of synonymous substitutions, which do not affect changes in  
178 amino acid residues, indicates that the elusive genes are also susceptible to genomic  
179 characteristics independent of selective constraints on gene functions.  
180 To further scrutinize the characteristics reflecting the genomic environment rather than  
181 gene function, we analyzed genomic characteristics that may distinguish the elusive  
182 from non-elusive genes. A comparison between these two categories revealed shorter  
183 gene-body lengths and higher GC contents of elusive rather than non-elusive genes  
184 (Figure 2c,d). Furthermore, a scan of intergenomic gene distribution revealed that the  
185 elusive genes were located in the genomic regions with high gene density compared  
186 with the non-elusive genes (Figure 2e). Our findings indicate that such elusive genes  
187 have distinct characteristics in the human genome. These genomic characteristics, as  
188 well as high nucleotide substitution rates, were consistent with the findings in our

189 genome analyses using the amniote and elasmobranch genomes (Hara et al., 2018b,  
190 2018a).

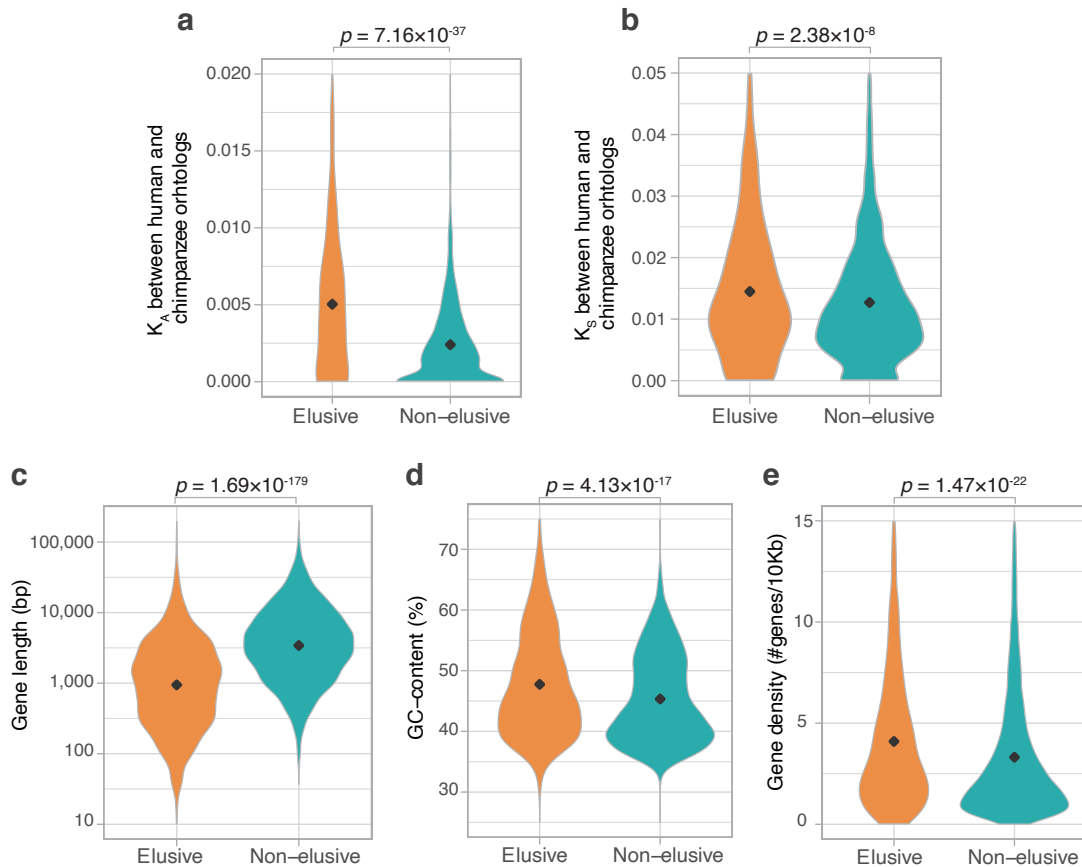

191

192 **Figure 2. Genomic and evolutionary characteristics of elusive genes**

193 Distributions of non-synonymous and synonymous substitution rates, namely  $K_A$  (a)  
194 and  $K_S$  (b) values, respectively, between the human-chimpanzee orthologs of the elusive  
195 and non-elusive genes. Distribution of gene length (c) and GC content (d) of the human  
196 elusive and non-elusive genes. (e) Distribution of gene density in the genomic regions  
197 where the human elusive and non-elusive genes are located.

198



199 *Tracing elusiveness back along the vertebrate evolutionary tree*

200 The origins of the human elusive genes can be traced back along the evolutionary tree,  
201 at least to the mammalian common ancestor. To investigate possible antiquities of the  
202 genomic properties associated with elusive genes, we investigated their orthologs in  
203 non-mammalian vertebrate genomes. By scrutinizing the ortholog groups that were used  
204 for elusive gene identification, we identified 982 human elusive gene orthologs for  
205 chimpanzee, 540 for mouse, 380 for chicken, 415 for central bearded dragon, 416 for  
206 clawed frog, 415 for coelacanth, 431 for spotted gar, and 390 for bamboo shark. These  
207 four non-mammalian vertebrates retained orthologs of fewer than half of the elusive  
208 genes, but most of the non-elusive ones (Figure 3–figure supplement 1a). In the  
209 coelacanth, gar, and shark, the orthologs of the elusive genes were less frequently  
210 retained by all the species than those of the non-elusive ones (Figure 3–figure  
211 supplement 1b). This suggests that the origins of the loss-prone propensity of the  
212 elusive genes potentially date back to long before the emergence of the Mammalia.

213 We further examined the genomic characteristics harbored by the human elusive  
214 genes in the vertebrate orthologs. In all the species examined, the orthologs of the  
215 elusive genes exhibited high GC content and compact gene bodies. Additionally, in  
216 most of these species, the orthologs of elusive genes were located in genomic regions  
217 with high gene density compared with orthologs of the non-elusive genes (Figure 3;  
218 Figure 3–figure supplement 2). In addition, we computed  $K_S$  and  $K_A$  values between the  
219 orthologs of the vertebrate species and their close relatives for elusive and non-elusive  
220 genes. In any of the species pairs, the orthologs of the elusive genes were found to  
221 harbor higher  $K_S$  values than those of the non-elusive gene orthologs, while the  
222 orthologs of the elusive genes exhibited higher  $K_A$  values in mammals and lizards

223 (Figure 3; Figure 2–figure supplement 1). These observations indicate that these  
224 genomic characteristics probably originated before the emergence of gnathostomes, a  
225 monophyletic group of chondrichthyan and bony vertebrates, and have been retained for  
226 at least 500 million years.  
227

228

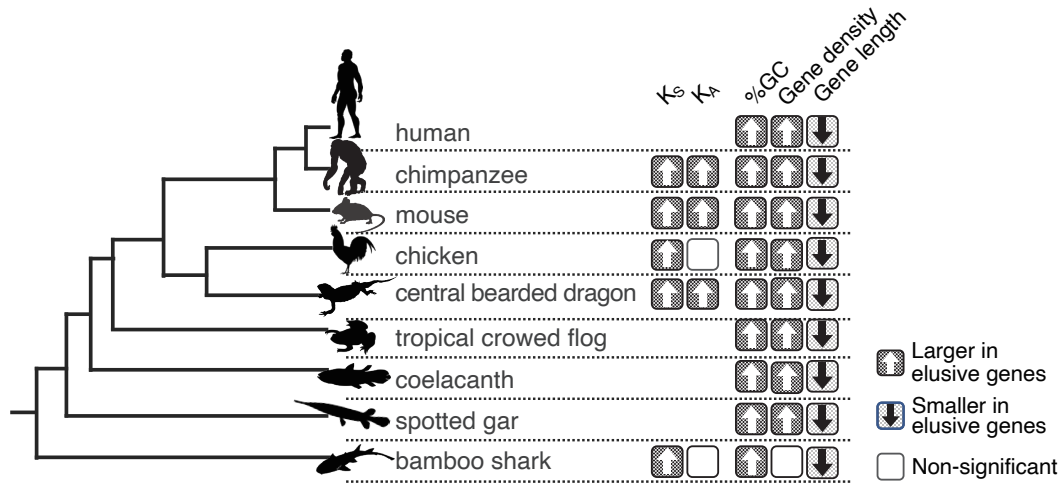

229

### 230 **Figure 3. Longstanding characteristics of elusive genes**

231 Retention of the genomic and evolutionary characteristics of the human elusive genes  
 232 across vertebrates. The individual round squares with arrowheads indicate significant  
 233 increases or decreases of the distribution of particular characteristics in the orthologs of  
 234 the human elusive genes and their flanking regions, compared with those of the non-  
 235 elusive genes in these selected vertebrate genomes. For the chimpanzee and mouse  
 236 genomes,  $K_A$  and  $K_S$  values were computed between the human elusive genes and the  
 237 orthologs of these mammals. For the non-mammalian species, these values were  
 238 computed with ortholog pairs for the elusive/non-elusive genes between the  
 239 corresponding species and their closely related species: turkey for chicken, green anole  
 240 for central bearded dragon, and whale shark for bamboo shark. Distributions of these  
 241 metrics for non-human species are shown in Supplementary Figures S1 and S3.  
 242

243 *Abundant polymorphism in elusive genes*

244 The observation of large  $K_S$  and  $K_A$  values in the elusive genes prompted us to examine  
245 the extent to which these genes have accommodated genetic variations in modern  
246 humans. Large-scale human genome resequencing projects have identified a huge  
247 number of genetic variations, from rare to common, and from single nucleotide variants  
248 (SNVs) to chromosome-scale structural variants, facilitating tackling this issue. We  
249 retrieved copy number variants (CNVs) and rare SNVs in the human genome from the  
250 Database of Genomic Variants, release 2016-08-31 (MacDonald et al., 2014) and  
251 dbSNP release 147 (Sherry et al., 2001), respectively, and computed their densities in  
252 the individual genic regions. We found that the genic regions of the human elusive  
253 genes contained abundant rare SNVs, as well as deletion and duplication CNVs,  
254 compared with those of the non-elusive genes (Figure 4a–c). This result suggests that  
255 genomic regions containing the elusive genes are not only prone to loss but also to  
256 duplication.

257 To evaluate the functional consequences of abundant genetic variants in the elusive  
258 genes, we investigated genetic variations stored in the gnomAD v. 2.1 database, a  
259 repository containing >120,000 exome and >15,000 whole genome sequences of human  
260 individuals (Karczewski et al., 2021). This database classifies SNVs in coding regions  
261 into three categories—synonymous, missense, and loss-of-function—and the loss-of-  
262 function category contains nonsense mutations, frameshift mutations, and mutations in  
263 splicing junctions. The gnomAD site computes a  $Z$ -score, an index representing the  
264 abundance of SNVs for individual genes; positive and negative values denote fewer or  
265 more mutations in a coding region than expected, respectively (Figure 4d–f).

266 Accordingly, the  $Z$ -score for nonsense mutations and loss-of-function mutations of the

267 individual genes indicates the degree of natural selection: larger values demonstrate  
268 genes subjected to purifying selection, while smaller ones suggest functional relaxation.  
269 We found lower  $Z$ -scores of missense and loss-of-function mutations (higher opposite  
270 numbers of  $Z$ -scores in Figure 4e, f) in the human elusive genes than in the non-elusive  
271 genes, suggesting that the elusive genes are more functionally dispensable and  
272 potentially resistant to harmful mutations. Additionally, the  $Z$ -scores of synonymous  
273 mutations of the human elusive genes were higher than those of the non-elusive genes  
274 (Figure 4d). This confirms the high mutability of genomic regions containing elusive  
275 genes, as observed in the  $K_S$  values.

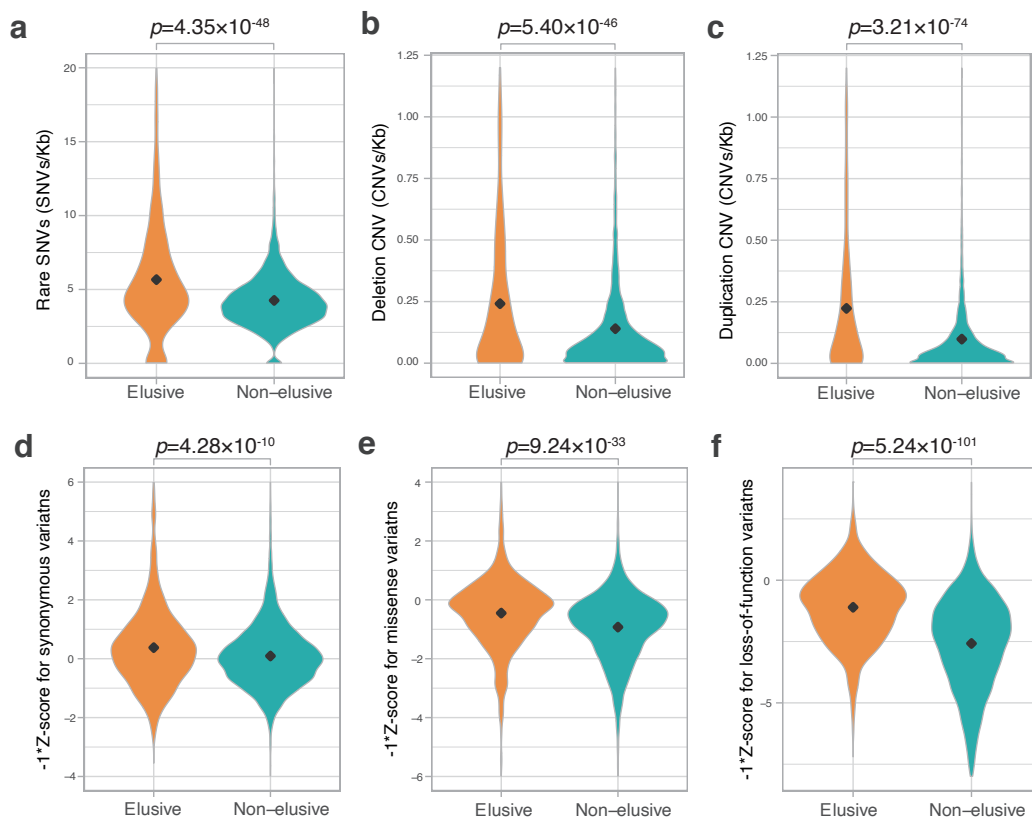

276

277 **Figure 4. Genetic variations of the elusive and non-elusive genes within human**  
278 **populations**

279 Comparison of the density of rare SNVs (a), deletion CNVs (b), duplication CNVs (c),

280 and Z-scores of synonymous (d), missense (e), and loss-of-function variants (f). We

281 used opposite numbers of the Z-scores in d–f so that the elusive genes have higher

282 values than non-elusive genes as in Figures 2a ,b, d, e and 3a–c.

283

284 *Transcriptomic natures of elusive genes*

285 To further investigate how the human elusive genes have decreased functional  
286 essentiality, we examined their expression profiles. For this purpose, we compared gene  
287 expression profiles of the 54 adult tissues from the GTEx database v. 8 (GTEx  
288 Consortium, 2020) between the elusive and non-elusive genes. For individual genes, we  
289 computed the maximum Transcription Per Million (TPM) values among these tissues as  
290 the expression quantity level. For expression diversities, we employed Shannon's  
291 diversity index  $H'$ , which is often utilized as an index of species diversity in the  
292 ecological literature, based on the proportion of TPM values across the 54 tissues.

293 As shown in the density scatter plots of the individual genes displaying these two  
294 indicators in Figure 5, most of the non-elusive genes possessed large maximum TPM  
295 and  $H'$  values. Thus, most non-elusive genes are ubiquitously expressed at certain  
296 levels. By contrast, the density plot of the elusive genes displayed an additional high-  
297 density spot with small TPM and  $H'$  values, indicating that the genes in this spot were  
298 not expressed, at least in adult tissues. The plot also showed another broad dense area of  
299 small  $H'$  values, which contained the genes expressed in a single or a few tissues. A  
300 similar analysis was performed with the fetal single cell RNA-seq data (Cao et al.,  
301 2020), revealing that the averaged expression profiles of the elusive and non-elusive  
302 genes for the 172 cell types were concordant with those of the adult tissues (Figure 5).  
303 Our findings demonstrate that some elusive genes harbor low-level and spatially-  
304 restricted expression profiles, which are rarely observed in the non-elusive genes.

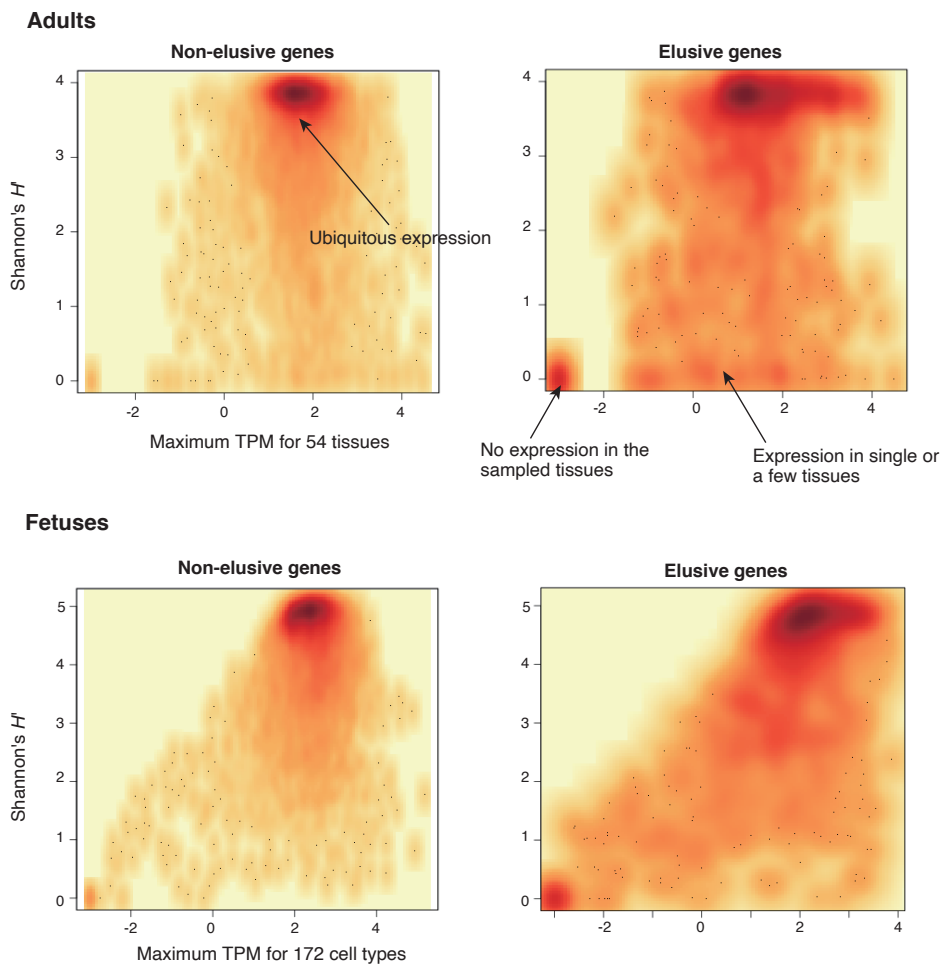

305

306 **Figure 5. Expression profiles of elusive and non-elusive genes**

307 The figure shows density scatter plots of the expression quantity and divergence of  
308 elusive and non-elusive genes. The median TPM values of the individual adult tissues  
309 across populations were retrieved from the GTEx database (GTEx Consortium, 2020),  
310 and normalized TPM values of the fetal cell types were retrieved from the Descartes  
311 database (Cao et al., 2020). For the individual genes, maximum TPM and Shannon's  $H'$   
312 values were computed using these processed TPM values.

313



314 *Epigenetic nature of elusive genes*

315 Our finding of the low-level and spatially-restricted expression patterns of elusive genes  
316 prompted us to explore epigenetic properties involved in this transcriptional regulation.  
317 Therefore, we retrieved epigenetic data on a variety of human cell lines from a few  
318 regulatory genome databases including ENCODE, a repository that stores the  
319 comprehensive annotations of functional elements in the human genome (ENCODE  
320 Project Consortium, 2012). Using this information, we characterized the epigenetic  
321 features of the genomic regions containing elusive genes (Figure 6).

322 We compared peak densities based on the Assay for Transposase-Accessible  
323 Chromatin using sequencing (ATAC-seq), an indicator of accessible chromatin regions  
324 in the genome, in the gene bodies and flanking regions between the elusive and non-  
325 elusive genes. In seven cell lines out of eight examined (nine experiments of ten), the  
326 results showed fewer ATAC-seq peaks in the genomic regions including the elusive  
327 genes than in those including non-elusive genes, indicating that the elusive genes are  
328 likely to reside in inaccessible genomic regions (Figure 6a; Figure 6–figure supplement  
329 1). We also searched for Topologically Associating Domains (TADs), genomic  
330 elements with frequent physical self-interaction potentially acting as promoter-enhancer  
331 contacts (Rao et al., 2014) that included either the elusive or non-elusive genes. The  
332 result showed that a higher fraction of the elusive genes resided outside of the TADs  
333 than the non-elusive genes for all the eleven cell lines investigated (Figure 6b; Figure 6–  
334 figure supplement 2). Furthermore, the elusive genes were located in shorter TADs.  
335 These observations suggest that the elusive genes are unlikely to be regulated by distant  
336 regulatory elements (Figure 6b).

337 Our investigations extended to the association of the elusive genes with further  
338 global regulation of genomic structures. We compared the percentage normalized signal  
339 of Repli-seq (Hansen et al., 2010), a high throughput sequencing for quantifying DNA  
340 replication time as a function of genomic position, between the elusive and non-elusive  
341 genes. The results showed that elusive genes were prone to late replication in all of the  
342 15 cell lines examined (Figure 6c; Figure 6–figure supplement 1). Late-replicating  
343 regions are frequently located at the nuclear periphery and often interact with the  
344 nuclear lamina. Therefore, we examined the nuclear position of the genomic regions  
345 including the elusive genes by referring to the Lamina Associating Domains (LADs)  
346 that were identified by the ChIP-seq reads for Lamin B1 (van Schaik et al., 2020; Zheng  
347 et al., 2018). Compared with the non-elusive genes, the elusive genes were found to be  
348 enriched in LADs for all of the four cell lines examined (Figure 6d; Figure 6–figure  
349 supplement 3), consistent with their late replication timings (van Steensel and Belmont,  
350 2017).

351 We further investigated the association of the restricted expressions of the elusive  
352 genes with epigenetic features. From 988 elusive genes whose expressions were  
353 quantified in the GTEx database, we classified the elusive genes into two groups based  
354 on the expression diversities: that is, 173 elusive genes with Shannon’s diversity index  
355  $H' > 1$  were ubiquitously expressed, and 815 of those with  $H' \leq 1$  were expressed in  
356 only a few or none of the tissues examined (Figure 5). Importantly, all of the four  
357 epigenetic features of the elusive genes with  $H' \leq 1$  were more pronounced than those  
358 with  $H' > 1$ : sparse ATAC-seq peaks, short TADs, late replication timings, and  
359 significant overlaps with LADs (Figure 6; Figure 6–figure supplement 4). This

360 observation suggests that low-level and spatially-restricted expressions of the elusive  
361 genes are associated with intrinsic epigenetic features of these genomic regions.

362 High GC contents in genomic regions potentially hinder identifying an epigenetic  
363 feature by short read sequencing because of underrepresentation of sequence reads by  
364 amplification-based sequencing libraries. This bias might lead to sparse distributions of  
365 the ATAC-seq peaks and Hi-C contacts in the genomic regions that contain the elusive  
366 genes. However, only 8.09% and 10.8% of the elusive genes with  $H' \leq 1$  and  $H' > 1$   
367 were located in extremely high GC-content regions (>60%), respectively, with no  
368 significant difference ( $p = 0.337$ ). Thus, the depleted epigenomic features in the  
369 genomic regions containing elusive genes are unlikely to be false discoveries caused by  
370 a technical issue, namely, underrepresentation of the sequencing reads.

371

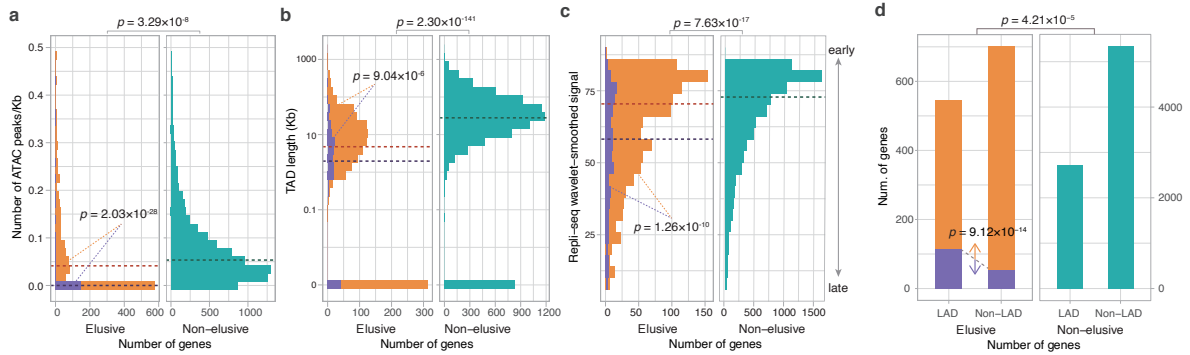

372

### 373 **Figure 6. Epigenetic features of the elusive genes**

374 Comparison of the distribution of ATAC-seq peak density (a), length of the  
375 Topologically Associating Domains (TADs) including the elusive or non-elusive genes  
376 (b), the replication timing indicator based on Repli-seq (c), and overlap with the  
377 Lamina-Associated Domains (LADs) computed from Lamin B1 ChIP-seq data. (d).  
378 ATAC-seq and Hi-C were performed with A549 cells, Repli-seq was performed with  
379 HepG2 cells, and Lamin B1 ChIP-seq was performed with HAP-1 cells. In the elusive  
380 gene panels, purple and orange bars indicate the elusive genes with restricted  
381 expressions ( $H' < 1$ ; Figure 5) and those with more ubiquitous expressions ( $H' \leq 1$ ),  
382 respectively. The results for other cells are shown in Supplementary Figures S4–S7. For  
383 each epigenetic characteristics, correction for multiple testing was performed for  
384 comparison in each cell cultures.

385

## 386 **Discussion**

387 Here we identified elusive genes that were lost in multiple lineages during mammalian  
388 evolution, using a comprehensive scan of gene phylogenies. To identify gene loss  
389 events, absence of evidence (i.e., missing genes caused by incomplete genome  
390 assemblies and gene annotations), should be reviewed meticulously (Deutekom et al.,  
391 2019). Additionally, gene loss might be detected erroneously because of failure in  
392 similarity searches for orthologs of rapidly evolving genes (Moyers and Zhang, 2015).  
393 In this study, we aimed to reduce these false discoveries through our multifaceted  
394 approaches (Figure 1). We selected those species with highly complete gene annotations  
395 through integration of multiple gene annotations. Using these improved gene  
396 annotations, we created orthologous groups by employing a highly sensitive homology  
397 search with MMSeq2 (Steinegger and Söding, 2017) and merged them into those  
398 identified in the Ensembl database. Furthermore, we restricted the loss events that were  
399 observed as gene absence in all species examined within all hierarchical levels of the  
400 selected taxonomic groups (Figure 1b). This absence is likely to have occurred as a gene  
401 loss in the common ancestor of the particular taxon rather than as a false discovery of  
402 gene loss in the individual species independently. Genuine continuous (e.g., telomere-  
403 to-telomere) genome assemblies are now available using modern sequencing  
404 technologies (Nurk et al., 2022). These genomic assemblies may help relieve the labor  
405 of examining for information losses, thereby facilitating the identification of genuine  
406 gene loss in any given species.

407 In the human genome, the elusive genes and their flanking regions harbor  
408 particular characteristics, including high GC-content and high gene density, that may  
409 have originated long before the emergence of mammals (Figure 3). Frequent

410 synonymous variations across modern humans in the elusive genes, consistent with  
411 higher synonymous substitution rates between the vertebrate orthologs, suggest that the  
412 genomic regions including elusive genes have been subject to rapid evolution for 500  
413 million years (Figures 2 and 4). Our findings indicate that heterogeneous genomic  
414 characteristics potentially affect the fate of genes at the latest period of vertebrate  
415 evolution. Analyses with large numbers of germline mutations in the human genome  
416 have illustrated the heterogeneity of mutation rates (Campbell and Eichler, 2013;  
417 Seplyarskiy and Sunyaev, 2021; Terekhanova et al., 2017). High GC-content in the  
418 elusive genes may have facilitated an elevation of the mutation rate, as observed in the  
419 enrichment of rare variants in high-GC regions in the human genome (Schaibley et al.,  
420 2013). In addition, some of the elusive genes appear to have retained particular  
421 epigenetic marks including sparse ATAC-seq peaks, late replication timings, and  
422 location within LADs (Figure 6; Supplementary Figures S4–S7); these epigenetic marks  
423 are relevant to an increase in the mutation rate. Genomic regions with late replication  
424 timing exhibit increased mutation rates because of their unstable structure during the S-  
425 phase of the cell cycle (Koren et al., 2012; Stamatoyannopoulos et al., 2009). LADs  
426 retain more G-to-A mutations because of their susceptibility to oxidative damage in the  
427 nuclear periphery resulting in high levels of 8-Oxoguanine (Yoshihara et al., 2014).

428       The epigenetic marks of elusive genes are relevant to the suppression of gene  
429 expression (van Steensel and Belmont, 2017), and indeed, these genes harbor weakened  
430 and spatially restricted expression profiles (Figures 5–6 and S4–S7). However, the  
431 genomic features associated with these epigenetic marks usually exhibit lower GC-  
432 contents and reduced gene density (Gilbert et al., 2004; Rao et al., 2014; van Steensel  
433 and Belmont, 2017). This discrepancy may be caused in part by a gain of local

434 heterochromatin accompanied with suppression of the expression of transposable  
435 elements, as observed in various eukaryotic genomes (Choi and Lee, 2020; Fiston-  
436 Lavier et al., 2007; Grewal and Jia, 2007; Rangasamy, 2013; Slotkin and Martienssen,  
437 2007; Underwood et al., 2017). Previous analyses showed frequent  
438 heterochromatinization of the human genomic regions where KRAB zinc finger genes  
439 colocalize with L1 retrotransposons (Imbeault et al., 2017; O’Geen et al., 2007; Vogel  
440 et al., 2006). One of the genomic regions found in human chromosome region 19p12  
441 also contains many elusive genes (Vogel et al., 2006) (Fig. 7). Closer attention to the  
442 local gene and repeat contents including repetitive elements and tandem gene clusters  
443 might facilitate our understanding of heterochromatinization in restricted genomic  
444 regions, although we excluded such gene clusters in our search for elusive genes (Figure  
445 1).

446 The heterogeneous locations of elusive genes can also be interpreted from a  
447 chromosome-scale viewpoint (Figure 7a; Figure 7–figure supplement 1). Elusive genes  
448 were found in particular genomic regions including nearly all of human chromosome  
449 19, and these regions clearly overlapped with regions of high gene density. This is  
450 consistent with our observation that the elusive genes were located in the genomic  
451 regions with higher gene density than those with the non-elusive genes. Importantly,  
452 some of these genomic regions were traced back to the microchromosomes of the  
453 ancestral gnathostomes and/or amniotes by karyotyping the ancestral genomes (Figure  
454 7b; Figure 7–figure supplement 1). Recent studies have indicated that these  
455 microchromosomes were generated from duplicated chromosomes via  
456 allotetraploidization in early vertebrate evolution followed by rapid deletion of large  
457 parts of the chromosomal regions (Nakatani et al., 2021; Simakov et al., 2020). In

458 addition, vertebrate microchromosomes harbor particular genomic features including  
459 high GC-content, high gene density, and high recombination rate, some of which are  
460 concordant with genomic regions containing elusive genes (Groenen et al., 2009;  
461 International Chicken Genome Sequencing Consortium, 2004; Schield et al., 2019).  
462 This inference of ancestral karyotypes augments our observations that some elusive  
463 natures have been retained for hundreds of millions of years, and further suggests that  
464 the disparity of genomic regions has been retained for an equivalent timescale.

465 Finally, we note the potential evolutionary courses that facilitate the transition of  
466 gene fate from retention to loss. One possible course is a decrease in essential functions  
467 because of rapid sequence evolution in local genomic regions. The elusive genes located  
468 in those genomic regions with rapidly-evolving characteristics are likely to accumulate  
469 neutral or even moderately harmful mutations in coding regions frequently, resulting in  
470 impaired essential functions. Another factor is the spatiotemporal suppression of gene  
471 expression via epigenetic constraints. Elusive genes with restricted expressions may  
472 have limited opportunities to function, potentially leading to loss of their important  
473 roles. The extent of these evolutionary forces may have varied with time and lineages,  
474 resulting in patchy loss of elusive genes phylogenetically. Interestingly, a recent large-  
475 scale scan of *de novo* mutations in *Arabidopsis* indicates the association of mutation  
476 rates with epigenetic features and functional essentiality of genes (Monroe et al., 2022).  
477 Further investigation of the association of genes with the surrounding genomic regions  
478 in various taxa may provide a common understanding of genomic and epigenomic  
479 features that potentially alter the fate of genes. Although epigenetic features are plastic,  
480 our findings indicate that the disparities of genomic regions are reflected in the  
481 heterogeneity of evolutionary forces and have been retained for hundreds of millions of



482 years. This idea prompts us to explore evolutionary constraints on more global genomic  
483 regions that are potentially associated with structural characteristics including  
484 chromosomal composition and locations within the nucleus.  
485

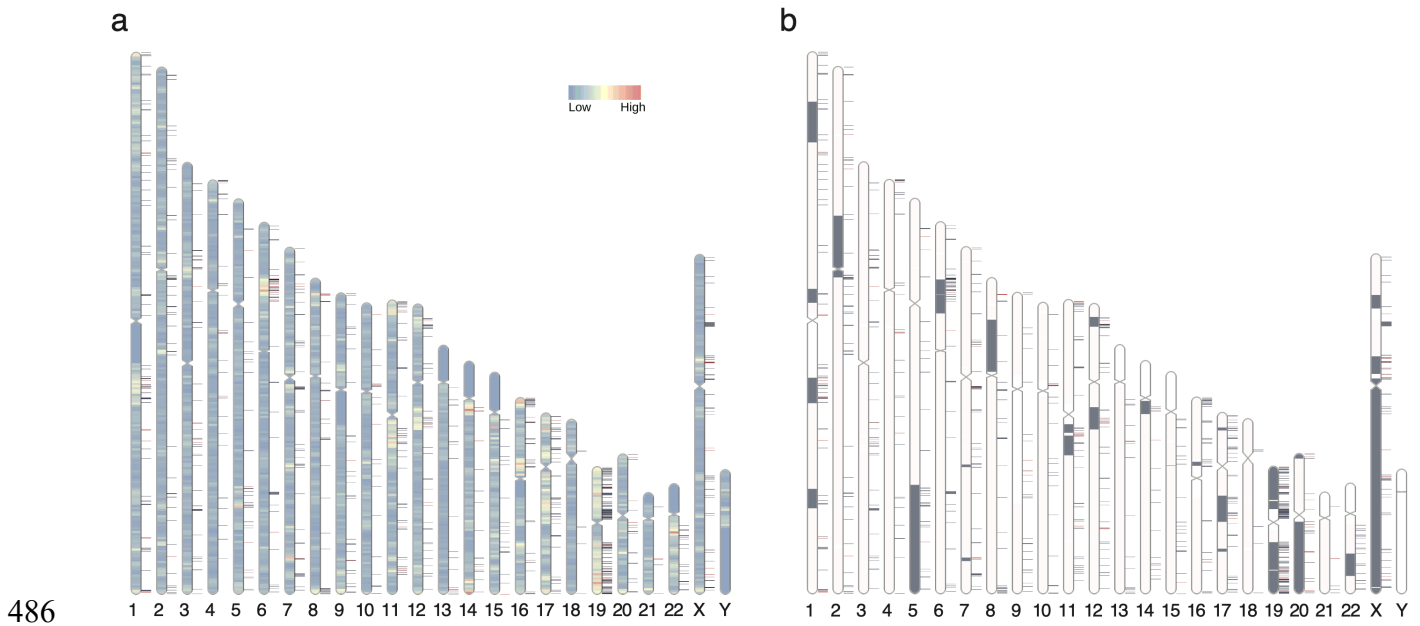

487 **Figure 7. Chromosomal distribution of human elusive genes**

488 Red and dark blue horizontal bars on the side of the chromosome diagram represent the  
489 location of elusive genes with restricted expression (Shannon's  $H' \leq 1$ ) and more  
490 ubiquitous expression ( $H' > 1$ ), respectively. (a) The chromosome diagrams are colored  
491 according to gene density (number of genes/Mb). (b) Gray regions in the diagram  
492 indicate orthologous regions of microchromosomes in the ancestors of gnathostomes  
493 (Nakatani et al., 2021). The chromosome diagrams were drawn using RIdeogram (Hao  
494 et al., 2020).

495

## 496 **Materials and Methods**

### 497 *Sequence retrieval*

498 We retrieved genome assemblies and gene annotations of 114 mammals and 132 non-  
499 mammal vertebrates from RefSeq (accessed on April 9, 2018), Ensembl release 92, and  
500 the repositories of the individual genome projects (Supplementary Table S1). Gene  
501 annotations for a single species from multiple repositories were integrated into one as  
502 follows. When gene annotations of multiple repositories were generated referring to the  
503 same version of the genome assembly, the annotation GTF files were merged with the  
504 ‘cuffcompare’ tool (Trapnell et al., 2012). Otherwise, translated amino acid sequences  
505 were clustered by CD-HIT v. 4.6.4 (Fu et al., 2012) with 100% sequence similarity, and  
506 the representative sequence for each cluster was retrieved by assuming that each cluster  
507 represented a single locus. Subsequently, we selected the canonical amino acid  
508 sequence for each locus: canonical peptides of the Ensembl genes were retrieved from  
509 the Ensembl database; for other resources, the longest amino acid sequence from the  
510 isoforms of a locus was chosen. The completeness of the gene annotations was  
511 performed on the gVolante web server with assessments by BUSCO v. 2 (Simão et al.,  
512 2015) by referring to the CVG (Hara et al., 2015) and BUSCO vertebrate ortholog sets.  
513 The gene annotations of mammals, birds, and ray-finned fishes that had fewer than 1%  
514 missing genes, as well as those of the other vertebrates with fewer than 3% missing  
515 genes, were selected. Exceptionally, the gene annotations of *Gavialis gangeticus*  
516 (Reptilia; CVG missing ratio 3.86%), *Paroedura picta* (Reptilia; BUSCO vertebrate  
517 ortholog missing rate 3.25%), and *Scyliorhinus torazame* (Chondrichthyes; BUSCO  
518 vertebrate ortholog missing rate 4.45%) were added. Finally, the amino acid sequence

519 set of 90 mammals and 101 non-mammalian vertebrates was subjected to t ortholog  
520 clustering. We also retrieved coding nucleotide sequences of the canonical amino acid  
521 sequences.

522

### 523 *Ortholog clustering and tree inference*

524 We retrieved gene trees of human protein-coding genes and their homologs from  
525 Ensembl Gene Tree release 92. From these gene trees, we constructed an amino acid  
526 sequence set of the homologs consisting of the species selected in the above section.  
527 This sequence set, restricted to Ensembl sequences only, was used as the ‘backbone’ of  
528 the ortholog set of all the selected species. In addition, we generated ortholog groups for  
529 all the species used by employing OrthoFinder2 v. 2.3.3 (Emms and Kelly, 2019) based  
530 on the similarity of amino acid sequences: a sequence similarity search was performed  
531 using MMSeqs2 v. 2339462c06eab0bee64e4fc0ebeb7707f6e53fd (Steinegger and  
532 Söding, 2017). The Ensembl and OrthoFinder ortholog sets were then merged to create  
533 the united set of ortholog groups, yielding 50,768 vertebrate ortholog groups.

534 The integrated ortholog groups were then subjected to molecular phylogenetic  
535 analysis. Amino acid sequences of the individual groups were aligned with MAFFT v.  
536 7.402 (Katoh and Standley, 2013), and ambiguous alignment sites were removed with  
537 trimAl v1.4 (Capella-Gutiérrez et al., 2009). Phylogenetic trees were inferred with IQ-  
538 Tree v. 1.6.6 (Nguyen et al., 2015) by selecting the optimal amino acid substitution  
539 model with ModelFinder (Kalyaanamoorthy et al., 2017) implemented in the IQ-Tree  
540 tool for each sequence alignment. In the inferred phylogenetic trees, ambiguously  
541 bifurcated nodes—those with branch lengths less than 0.0025—were collapsed into a  
542 multifurcational node by the ‘di2multi’ function implemented in ape v. 5.5 (Paradis and

543 Schliep, 2019). The trees were then rooted with the automatic rooting function  
544 ‘get\_age\_balanced\_outgroup’ implemented in ete3 v. 3.1.1 (Huerta-Cepas et al., 2016)  
545 to minimize any discrepancy of tree topologies with the taxonomic hierarchy of the  
546 species included.

547

#### 548 *Identification of elusive genes in the human genome*

549 For the individual trees, orthologs of the human genes were detected by the  
550 ‘get\_my\_evolution\_events’ function in ete3 (Huerta-Cepas et al., 2007). This function  
551 inferred gene duplication nodes in the rooted trees, resulting in separation of the trees  
552 into 17,495 subtrees of mammalian ortholog groups containing human genes. The  
553 ortholog information was referenced to extract the species with no orthologs to  
554 humans . This absence was further assessed by the ortholog annotation of human genes  
555 in the Ensembl Gene Tree database.

556 We selected taxonomic groups for the individual mammalian ortholog groups in  
557 which the orthologs were missing in all the species examined (Supplementary Table  
558 S1). We restricted our study to gene losses that were likely to have occurred in the  
559 common ancestor of particular taxonomic groups, rather than those arising from the  
560 incompleteness of gene annotations. When a gene was missing in all the taxonomic  
561 groups in the same hierarchy, we considered that the gene was lost in the common  
562 ancestor of these groups. Finally, we found 1,233 human genes belonging to the  
563 ortholog groups that were absent in two or more taxonomic groups and defined them as  
564 elusive genes. We further selected 1,081 elusive genes that harbored three or fewer  
565 mammalian paralogs for the following analyses. Similarly, we extracted 8,050 human  
566 genes whose orthologs were found in all the mammalian species examined and defined

567 them as non-elusive genes. Because these elusive and non-elusive genes were identified  
568 in the GRCh38 human genome, we performed the following analyses referring to that  
569 assembly.

570

#### 571 *Extraction of genomic and molecular evolutionary characteristics*

572 We calculated the GC content of a gene by using its genomic region including introns  
573 and untranslated regions (UTRs). To calculate individual gene densities, we extracted  
574 genomic regions containing the genes and their flanking three genes at both ends and  
575 divided them by seven. The orthologs of the elusive and non-elusive genes were  
576 retrieved from the aforementioned gene trees. Amino acid sequence alignment of the  
577 human and the ortholog genes was performed using MAFFT. Nucleotide sequence  
578 alignments of the coding regions were generated by ‘back-translation’ of the amino acid  
579 sequence alignments by trimAl, simultaneously removing ambiguous alignment sites.  
580 By employing coding nucleotide sequence alignments, numbers of synonymous and  
581 non-synonymous substitutions per site were computed using PAML v. 4.9a (Yang,  
582 2007).

583

#### 584 *Multiomics analysis*

585 Common and rare SNVs of the human populations were retrieved from dbSNP release  
586 147 (Sherry et al., 2001), and human CNVs were obtained from the Database of  
587 Genomic Variants (DGV) release 2016-08-31 (MacDonald et al., 2014). The CNVs  
588 were classified into duplication and deletion variants, according to the annotation in  
589 DGV. The density of these variants in a gene was computed by dividing the number of

590 variants identified in a gene region by its sequence length. Z-scores, indices of the  
591 tolerance against mutations, of synonymous, missense, and loss-of-function mutations  
592 of the individual genes were retrieved from gnomAD v. 2.1.1 (Karczewski et al., 2021).

593 Gene expression quantifications of adult and fetal tissues were retrieved from  
594 public databases. Expression profiles of adult tissues were obtained from the GTEx  
595 database v. 8 (GTEx Consortium, 2020), computed by averaging TPM values across  
596 individuals. Expression profiles of fetal tissues were obtained from the Developmental  
597 Single Cell Atlas of gene Regulation and Expression (Descartes) portal (Cao et al.,  
598 2020), by calculating averaged TPM values of single cells. The maximum TPM values  
599 of the individual genes among the tissues were taken as the representative gene  
600 expression levels. As a proxy of the spatial diversity of gene expression, Shannon's  
601 species diversity index ( $H'$  values) were computed for the individual genes using the  
602 following equation:

$$603 \quad H_i' = - \sum_{k=1}^R p_{i,k} \ln p_{i,k}$$

604 where  $H_i'$  represents the Shannon's index of  $i$ th gene in the list of the human genes,  $p_{i,k}$   
605 represents the proportion of the TPM values of the  $i$ th gene in the  $k$ th tissues/cell types,  
606 and  $R$  denotes the total number of tissues/cell types examined.

607 The ATAC-seq peaks and TAD boundaries of the human primary cells and  
608 culture strains were retrieved from the ENCODE 3 repository (Accession ID listed in  
609 Table S3) (ENCODE Project Consortium, 2012). Wavelet-smoothed signals of the  
610 ENCODE Repli-seq data were obtained from the UCSC genome browser (Hansen et al.,  
611 2010). The 20 kb bin-associated domains of LAD-seq that employed Lamin B1

612 antibodies (van Schaik et al., 2020) were retrieved from the 4D Nucleome Data Portal  
613 (<https://data.4dnucleome.org/publications/f1218a92-1f37-4519-85d6-ccedd5f7ad39>).

614

615 *Code availability*

616 The scripts for inferring gene presence and absence from gene tree was deposited in  
617 GitHub (<https://github.com/yuichiroharajpn/ElusiveGenes>).

618

619 *Statistical tests*

620 Comparisons of the genomic characteristics between the elusive and non-elusive genes  
621 were tested statistically with the nonparametric Mann–Whitney  $U$  test and Fisher’s  
622 exact test implemented in R. Correction of multiple testing was performed using the  
623 Benjamini–Hochberg false discovery rate (FDR) approach.

624

625



## 626 Supplementary Figures

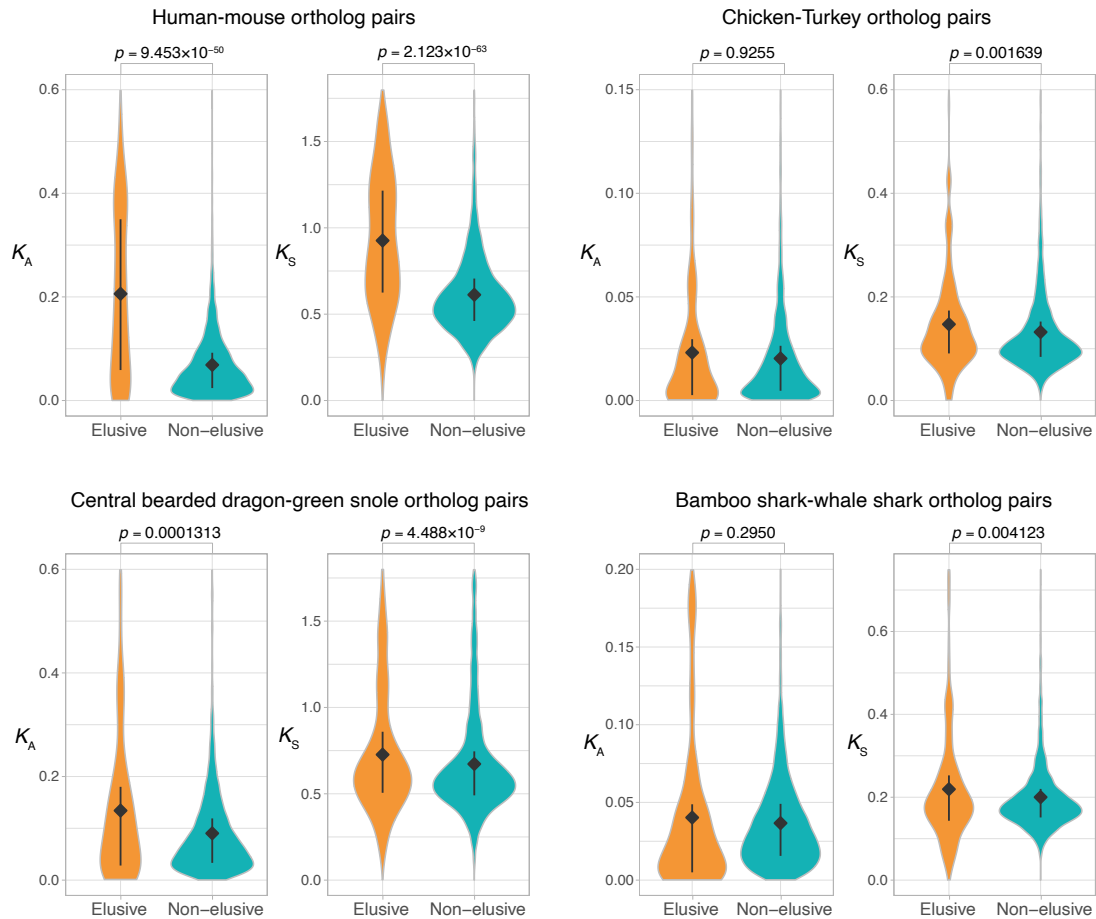

627

628 **Figure 2–figure supplement 1. Comparison of  $K_A$  and  $K_S$  values between orthologs**  
629 **of the elusive and non-elusive genes**

630 Distributions of  $K_A$  and  $K_S$  values between the orthologs of human elusive and non-  
631 elusive genes of closely related vertebrates. Correction for multiple testing was  
632 performed for comparison in each species pair.

633

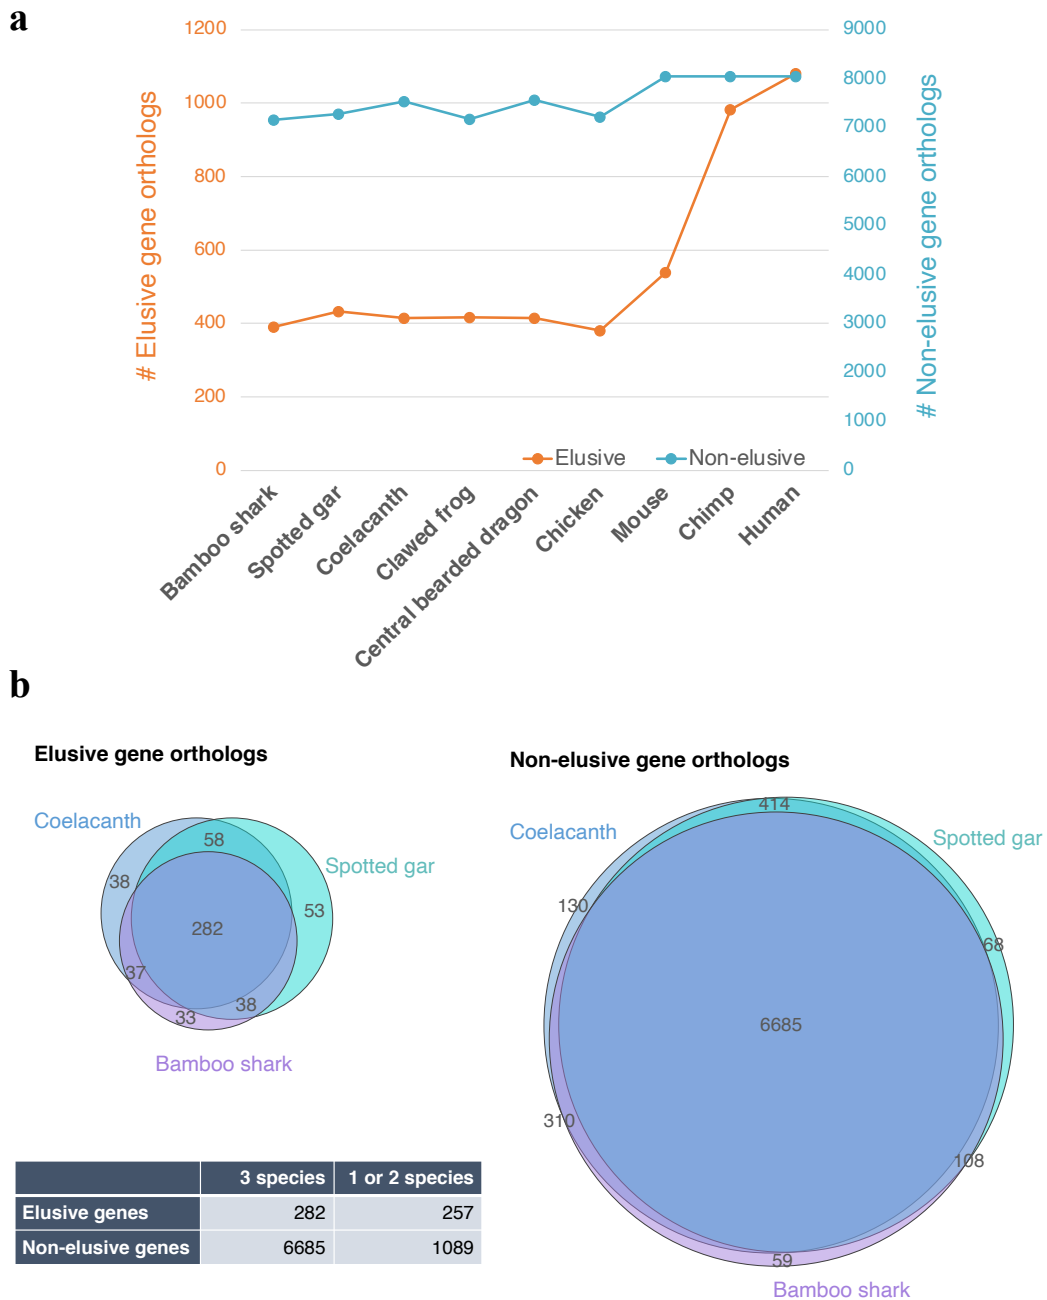

634

635 **Figure 3—figure supplement 1. Asymmetric ortholog retention across the**

636 **vertebrates**

637 Number of retained orthologs of the human elusive and non-elusive genes (**a**) and the

638 overlaps of the retained orthologs across three vertebrates distantly related to modern

639 humans **(b)**. The  $p$ -value of the  $2 \times 2$  contingency table given by Fisher's exact test is

640  $4.5 \times 10^{-71}$ .

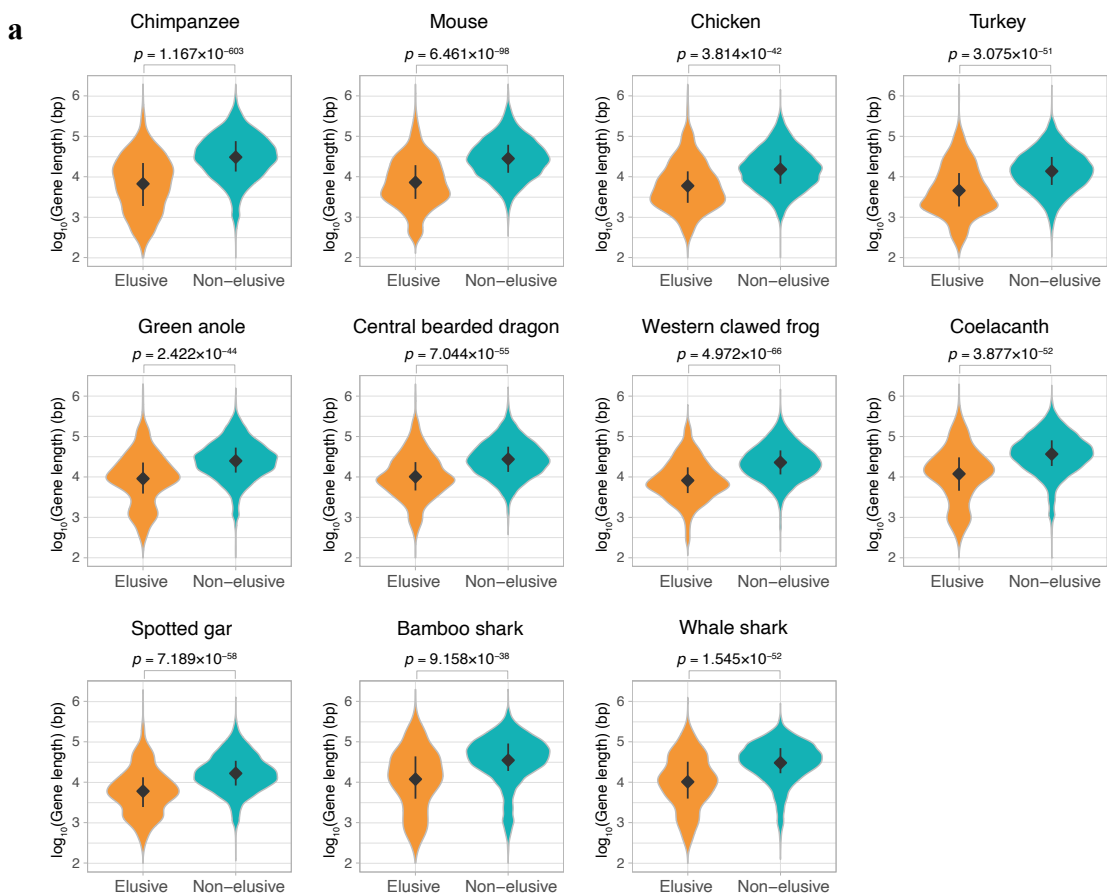

641

642 **Figure 3—figure supplement 2. Genomic characteristics of the orthologs of elusive**  
643 **and non-elusive genes**

644 Distribution of (a) gene length and (b) GC-content of the orthologs of the human  
645 elusive and non-elusive genes and (c) distribution of the gene density of the genomic  
646 regions where the orthologs of the human elusive and non-elusive genes are located. For  
647 each genomic characteristics, correction for multiple testing was performed for  
648 comparison in each species.

649

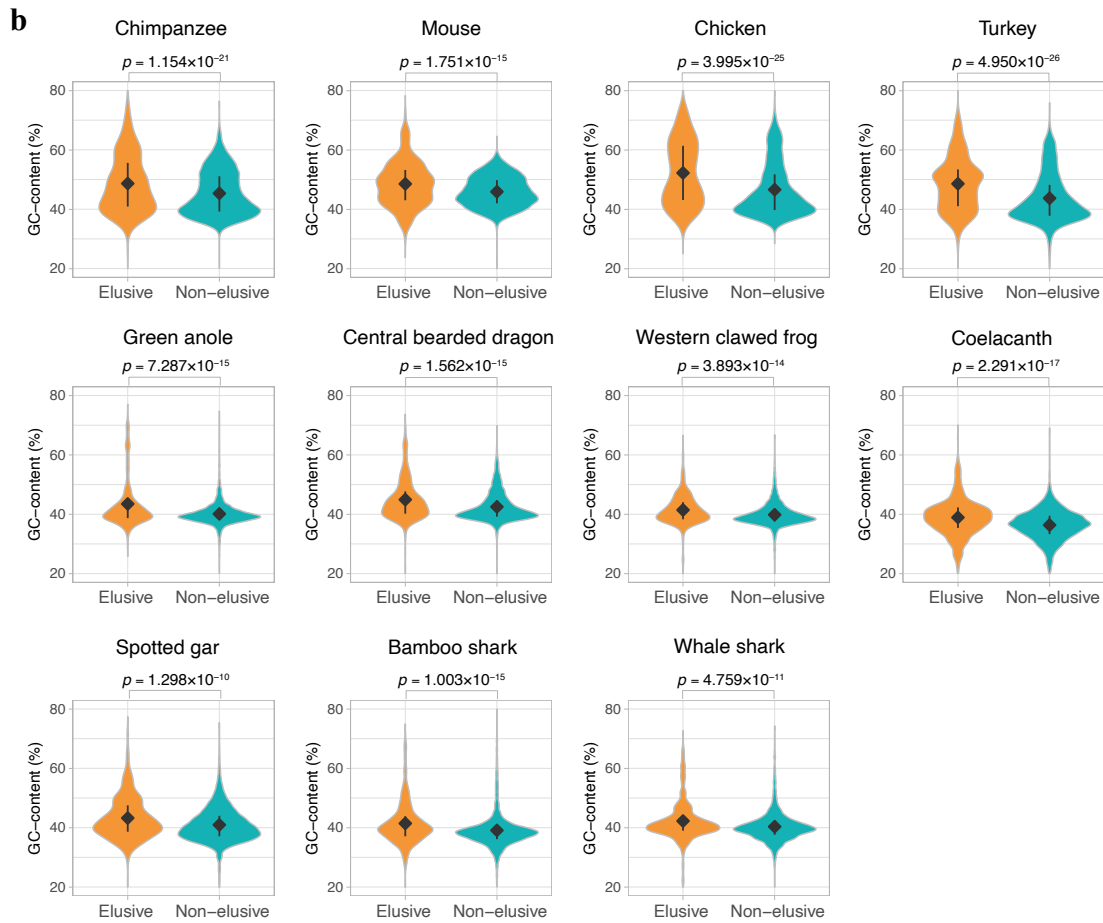

650

651

652 **Figure 3—figure supplement 2 (continued). Genomic characteristics of the**

653 **orthologs of elusive and non-elusive genes**

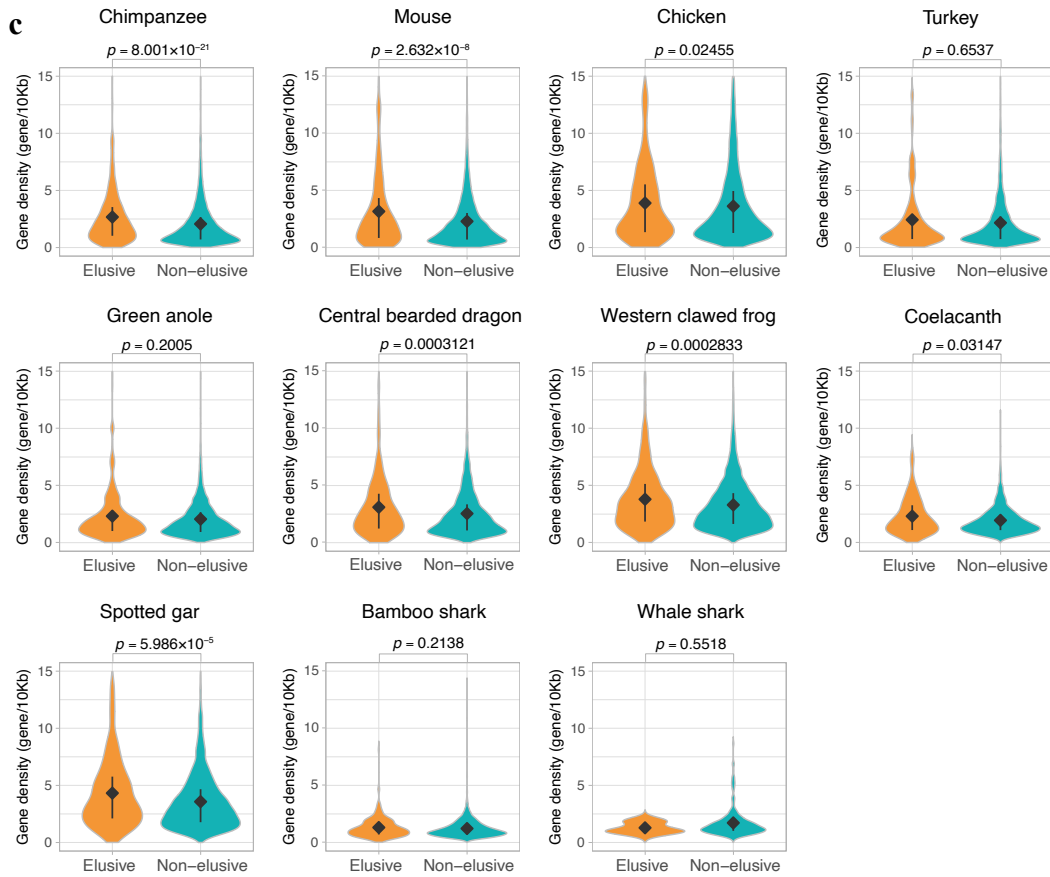

654

655 **Figure 3—figure supplement 2 (continued). Genomic characteristics of the**

656 **orthologs of elusive and non-elusive genes**

657

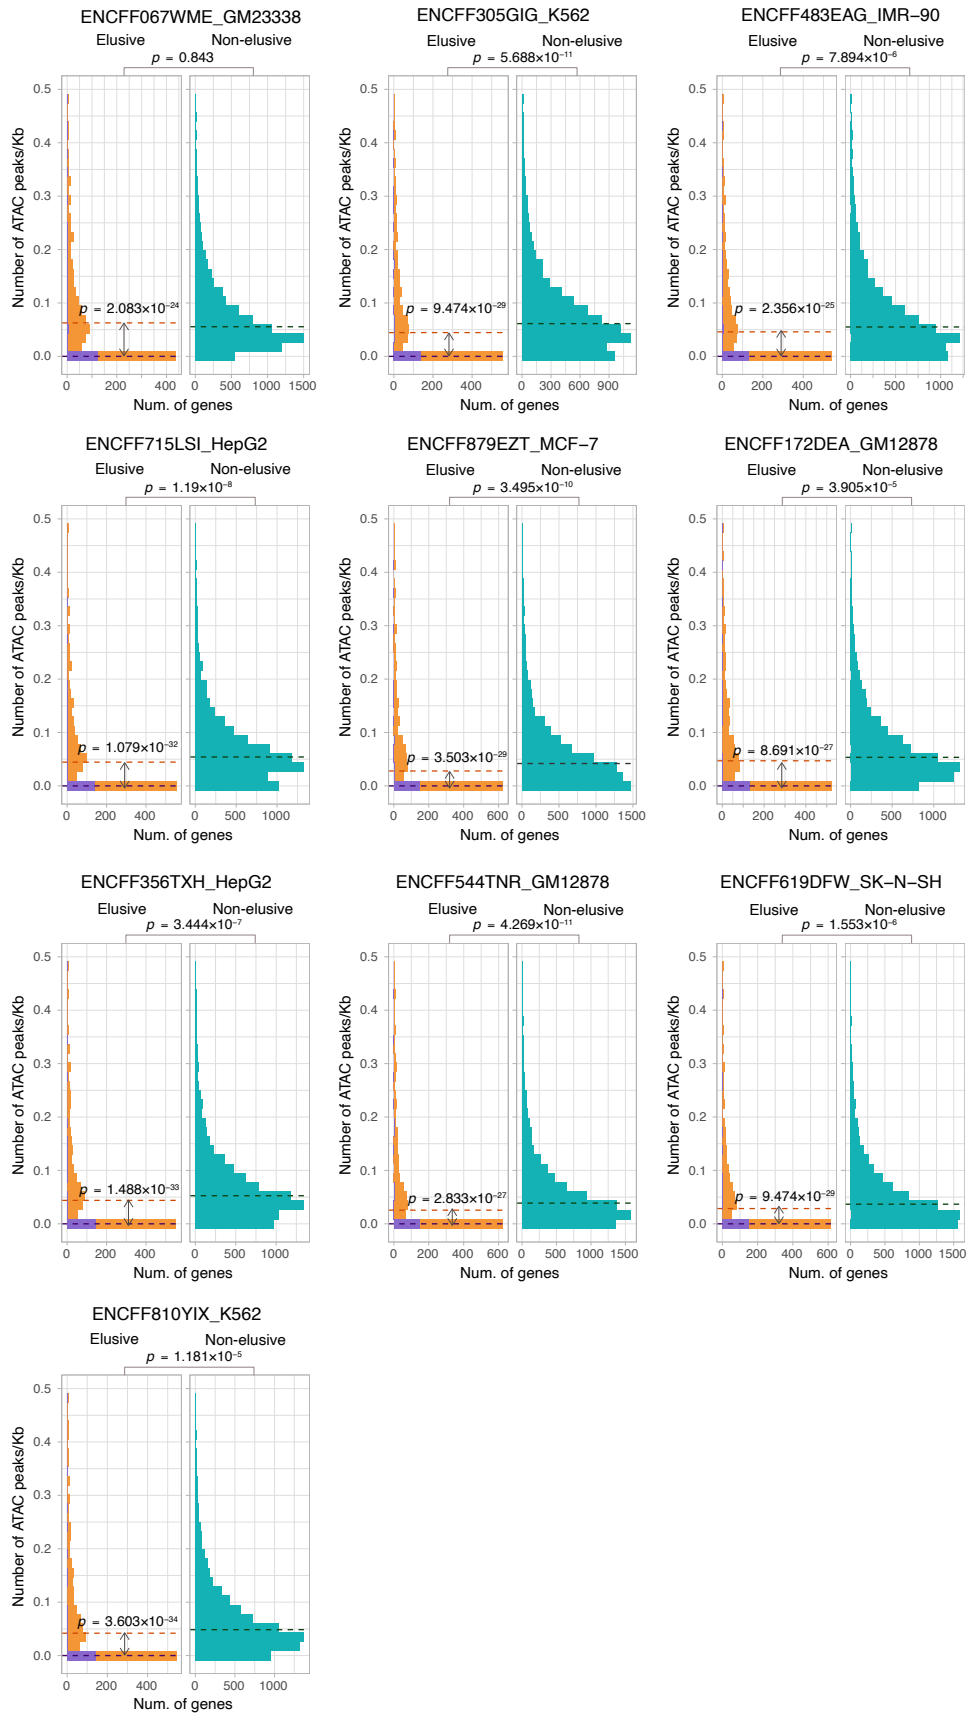

659 **Figure 6–figure supplement 1. ATAC-seq peak density of the elusive and non-**  
660 **elusive gene regions**

661 Comparison of the distribution of ATAC-seq peak density between the elusive and non-  
662 elusive genes across multiple cell types. In the elusive gene panels, purple and orange  
663 bars indicate the elusive genes with restricted expressions ( $H' < 1$ ; Figure 5) and those  
664 with more ubiquitous expressions ( $H' \leq 1$ ), respectively. Correction for multiple testing  
665 was performed for comparison in each cell cultures.



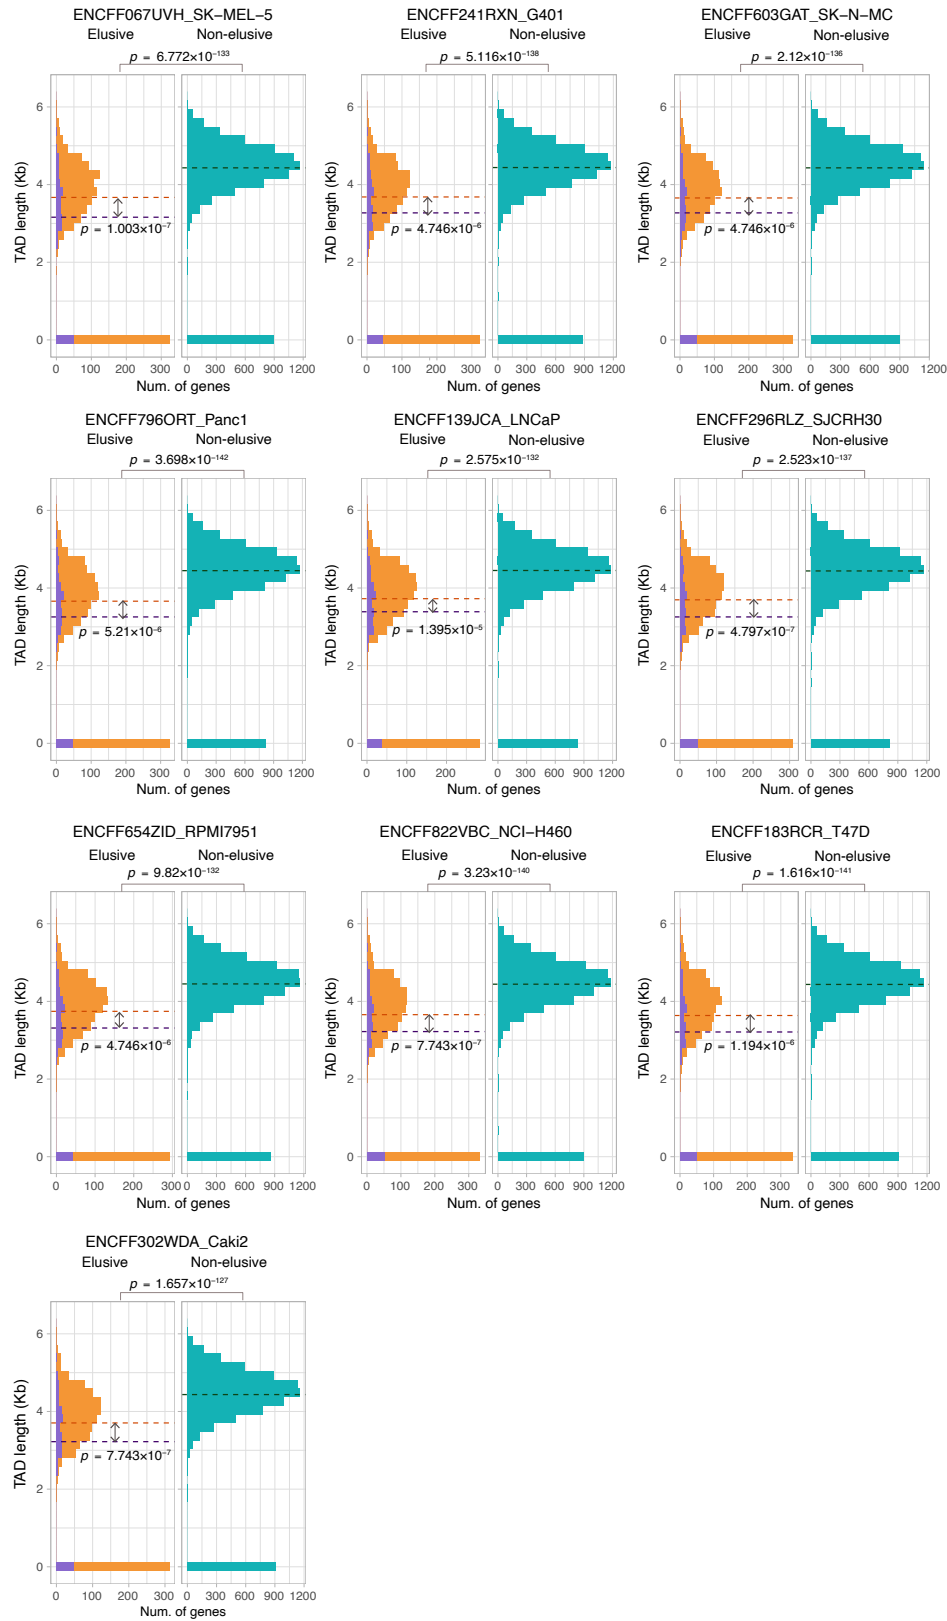

667 **Figure 6–figure supplement 2. Sequence lengths of the topologically associating**

668 **domains (TADs) containing elusive or non-elusive genes**

669 Comparison of the distribution of length of TADs including the elusive or non-elusive

670 genes across multiple cell types. In the elusive gene panels, purple and orange bars

671 indicate the elusive genes with restricted expressions ( $H' < 1$ ; Figure 5) and those with

672 more ubiquitous expressions ( $H' \leq 1$ ), respectively. Correction for multiple testing was

673 performed for comparison in each cell cultures.

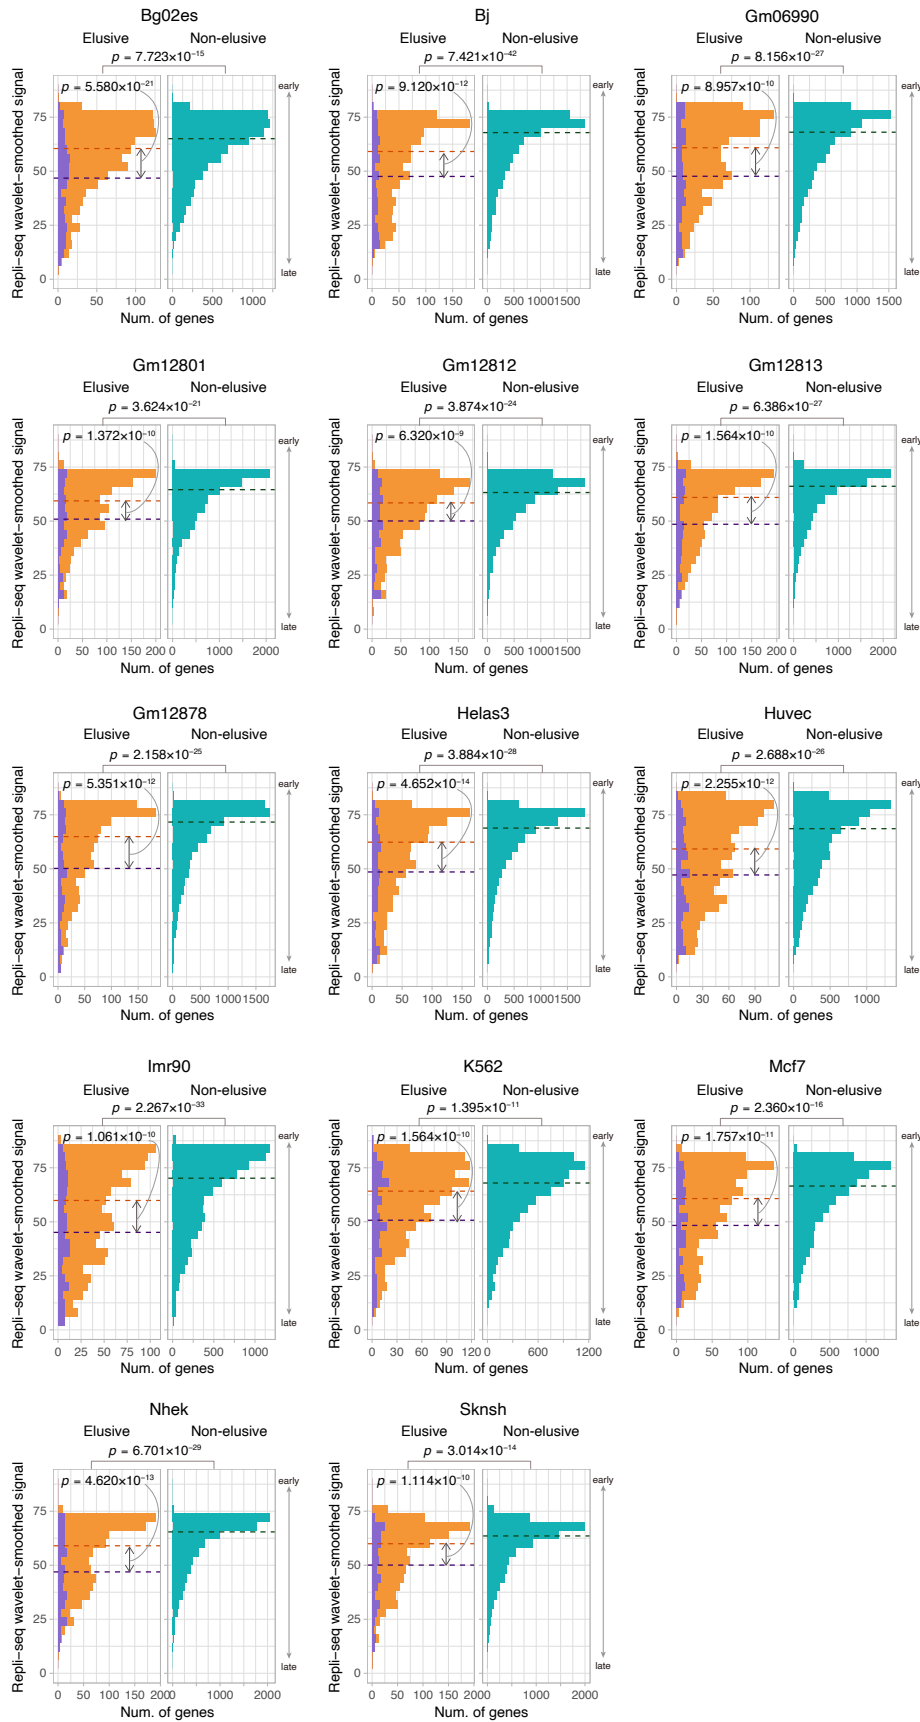

675 **Figure 6–figure supplement 3. Comparison of the replication timing indicator**

676 **based on Repli-seq between the elusive and non-elusive genes.**

677 Comparison of the distribution of replication timing indicator based on Repli-seq  
678 between the elusive and non-elusive genes across multiple cell types. In the elusive gene  
679 panels, purple and orange bars indicate elusive genes with restricted expressions ( $H' <$   
680  $1$ ; Figure 5) and those with more ubiquitous expressions ( $H' \leq 1$ ), respectively.  
681 Correction for multiple testing was performed for comparison in each cell cultures.

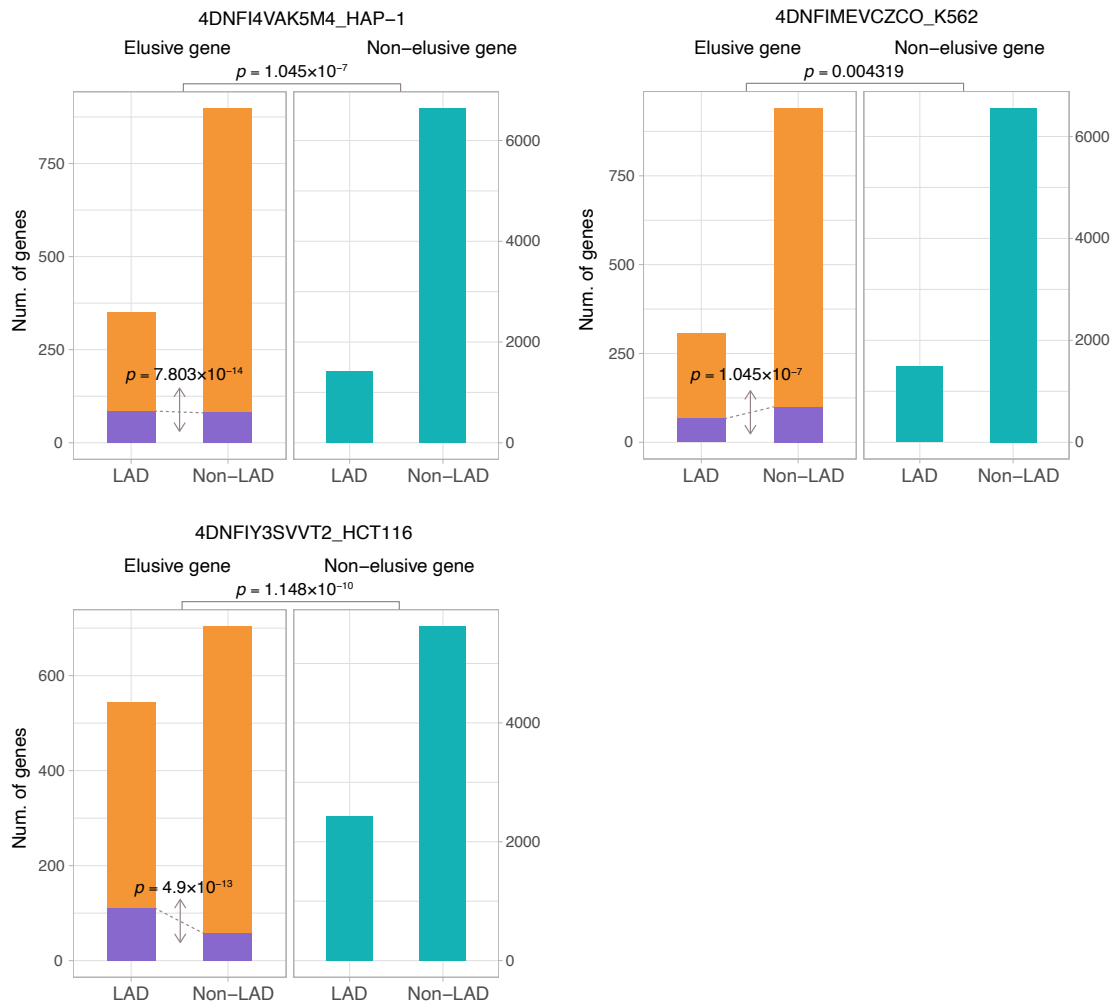

682

683 **Figure 6–figure supplement 4. The fraction of elusive and non-elusive genes that**

684 **overlap with Lamina-Associated Domains (LADs)**

685 Comparison of frequency of overlap with LADs computed from Lamin B1 ChIP-seq

686 data between the elusive and non-elusive genes across multiple data. In the elusive gene

687 panels, purple and orange bars indicate elusive genes with restricted expressions ( $H' <$

688  $1$ ; Figure 5) and those with more ubiquitous expressions ( $H' \leq 1$ ), respectively. The

689 results for other cells are shown in Figures S4–S7.

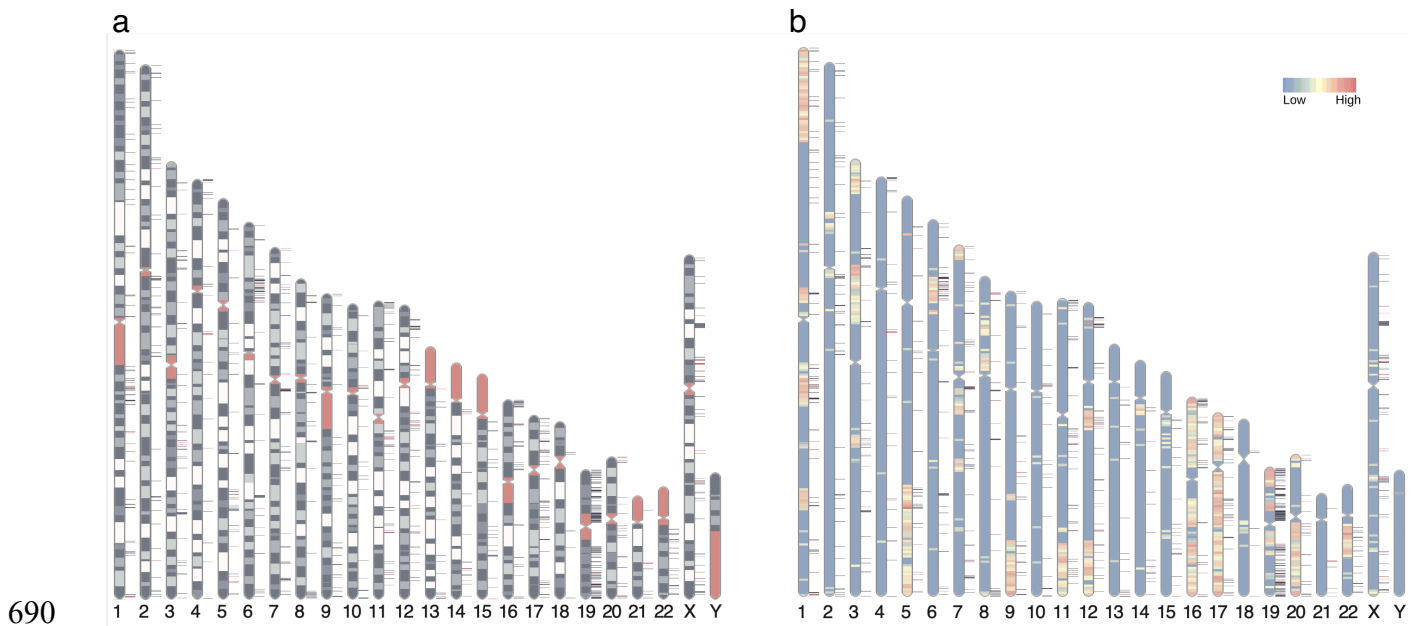

691 **Figure 7–figure supplement 1. Distribution of elusive genes across human**

692 **chromosomes**

693 Red and dark blue horizontal bars on the side of the chromosome diagram represent the  
694 location of elusive genes with restricted expression (Shannon's  $H' \leq 1$ ) and more  
695 ubiquitous expression ( $H' > 1$ ), respectively. **(a)** Karyotypes are shown by G-banding.  
696 Red regions indicate centromeres, acrocentric regions, and variable-length regions. **(b)**  
697 The chromosome diagrams are colored according to the density of the genes that harbor  
698 chicken orthologs in microchromosomes (number of genes/Mb). The chromosome  
699 diagrams were drawn using RIdeogram (GTEx Consortium, 2020).

700 **Acknowledgements**

701 We thank Dr. Yoichiro Nakatani for providing the information of orthologous regions  
702 of ancestral chromosomes in the human genome. This work was supported by RIKEN  
703 to S.K., JSPS KAKENHI Grant Number 20H03269 to S.K. and 21K06132 to Y.H., and  
704 Mochida Memorial Foundation for Medical and Pharmaceutical Research to Y.H.  
705 Computations were partially performed on the NIG supercomputer at ROIS National  
706 Institute of Genetics.

707 **Competing interests**

708 The authors declare that they have no competing interests.

709

710 **References**

711

712 Albalat R, Cañestro C. 2016. Evolution by gene loss. *Nat Rev Genet* **17**:379–391.

713 Bartha I, di Iulio J, Venter JC, Telenti A. 2018. Human gene essentiality. *Nat Rev Genet*  
714 **19**:51–62.

715 Bernardi G, Bernardi G. 1986. Compositional constraints and genome evolution. *J Mol*  
716 *Evol* **24**:1–11.

717 Blanc G, Agarkova I, Grimwood J, Kuo A, Brueggeman A, Dunigan DD, Gurnon J,  
718 Ladunga I, Lindquist E, Lucas S, Pangilinan J, Pröschold T, Salamov A,  
719 Schmutz J, Weeks D, Yamada T, Lomsadze A, Borodovsky M, Claverie J-M,  
720 Grigoriev IV, Van Etten JL. 2012. The genome of the polar eukaryotic  
721 microalga *Coccomyxa subellipsoidea* reveals traits of cold adaptation. *Genome*  
722 *Biol* **13**:R39.

723 Botero-Castro F, Figuet E, Tilak M-K, Nabholz B, Galtier N. 2017. Avian Genomes  
724 Revisited: Hidden Genes Uncovered and the Rates versus Traits Paradox in  
725 Birds. *Mol Biol Evol* **34**:3123–3131.

726 Byrne KP, Wolfe KH. 2007. Consistent patterns of rate asymmetry and gene loss  
727 indicate widespread neofunctionalization of yeast genes after whole-genome  
728 duplication. *Genetics* **175**:1341–1350.

729 Campbell CD, Eichler EE. 2013. Properties and rates of germline mutations in humans.  
730 *Trends Genet* **29**:575–584.

731 Cao J, O’Day DR, Pliner HA, Kingsley PD, Deng M, Daza RM, Zager MA, Aldinger  
732 KA, Blecher-Gonen R, Zhang F, Spielmann M, Palis J, Doherty D, Steemers FJ,  
733 Glass IA, Trapnell C, Shendure J. 2020. A human cell atlas of fetal gene  
734 expression. *Science* **370**:eaba7721.

735 Capella-Gutiérrez S, Silla-Martínez JM, Gabaldón T. 2009. trimAl: a tool for automated  
736 alignment trimming in large-scale phylogenetic analyses. *Bioinformatics*  
737 **25**:1972–1973.

738 Choi JY, Lee YCG. 2020. Double-edged sword: The evolutionary consequences of the  
739 epigenetic silencing of transposable elements. *PLoS Genet* **16**:e1008872.

740 Cohen N, Dagan T, Stone L, Graur D. 2005. GC composition of the human genome: in  
741 search of isochores. *Mol Biol Evol* **22**:1260–1272.

742 Cortez D, Marin R, Toledo-Flores D, Froidevaux L, Liechti A, Waters PD, Grützner F,  
743 Kaessmann H. 2014. Origins and functional evolution of Y chromosomes across  
744 mammals. *Nature* **508**:488–493.



- 745 Debatisse M, Le Tallec B, Letessier A, Dutrillaux B, Brison O. 2012. Common fragile  
746 sites: mechanisms of instability revisited. *Trends Genet* **28**:22–32.
- 747 Deutekom ES, Vosseberg J, van Dam TJP, Snel B. 2019. Measuring the impact of gene  
748 prediction on gene loss estimates in Eukaryotes by quantifying falsely inferred  
749 absences. *PLoS Comput Biol* **15**:e1007301.
- 750 Emms DM, Kelly S. 2019. OrthoFinder: phylogenetic orthology inference for  
751 comparative genomics. *Genome Biol* **20**:238.
- 752 ENCODE Project Consortium. 2012. An integrated encyclopedia of DNA elements in  
753 the human genome. *Nature* **489**:57–74.
- 754 Fernández R, Gabaldón T. 2020. Gene gain and loss across the metazoan tree of life.  
755 *Nat Ecol Evol* **4**:524–533.
- 756 Fiston-Lavier A-S, Anxolabehere D, Quesneville H. 2007. A model of segmental  
757 duplication formation in *Drosophila melanogaster*. *Genome Res* **17**:1458–1470.
- 758 Fu L, Niu B, Zhu Z, Wu S, Li W. 2012. CD-HIT: accelerated for clustering the next-  
759 generation sequencing data. *Bioinformatics* **28**:3150–3152.
- 760 Giaever G, Nislow C. 2014. The yeast deletion collection: a decade of functional  
761 genomics. *Genetics* **197**:451–465.
- 762 Gilbert N, Boyle S, Fiegler H, Woodfine K, Carter NP, Bickmore WA. 2004.  
763 Chromatin architecture of the human genome: gene-rich domains are enriched in  
764 open chromatin fibers. *Cell* **118**:555–566.
- 765 Grewal SIS, Jia S. 2007. Heterochromatin revisited. *Nat Rev Genet* **8**:35–46.
- 766 Groenen MAM, Wahlberg P, Foglio M, Cheng HH, Megens H-J, Crooijmans RPMA,  
767 Besnier F, Lathrop M, Muir WM, Wong GK-S, Gut I, Andersson L. 2009. A  
768 high-density SNP-based linkage map of the chicken genome reveals sequence  
769 features correlated with recombination rate. *Genome Res* **19**:510–519.
- 770 GTEx Consortium. 2020. The GTEx Consortium atlas of genetic regulatory effects  
771 across human tissues. *Science* **369**:1318–1330.
- 772 Gujjarro-Clarke C, Holland PWH, Paps J. 2020. Widespread patterns of gene loss in the  
773 evolution of the animal kingdom. *Nat Ecol Evol* **4**:519–523.
- 774 Hansen RS, Thomas S, Sandstrom R, Canfield TK, Thurman RE, Weaver M, Dorschner  
775 MO, Gartler SM, Stamatoyannopoulos JA. 2010. Sequencing newly replicated  
776 DNA reveals widespread plasticity in human replication timing. *Proc Natl Acad  
777 Sci U S A* **107**:139–144.
- 778 Hao Z, Lv D, Ge Y, Shi J, Weijers D, Yu G, Chen J. 2020. RIdiogram: drawing SVG  
779 graphics to visualize and map genome-wide data on the idiograms. *PeerJ  
780 Comput Sci* **6**:e251.

- 781 Hara Y, Takeuchi M, Kageyama Y, Tatsumi K, Hibi M, Kiyonari H, Kuraku S. 2018a.  
782 Madagascar ground gecko genome analysis characterizes asymmetric fates of  
783 duplicated genes. *BMC Biol* **16**:40.
- 784 Hara Y, Tatsumi K, Yoshida M, Kajikawa E, Kiyonari H, Kuraku S. 2015. Optimizing  
785 and benchmarking de novo transcriptome sequencing: from library preparation  
786 to assembly evaluation. *BMC Genomics* **16**:977.
- 787 Hara Y, Yamaguchi K, Onimaru K, Kadota M, Koyanagi M, Keeley SD, Tatsumi K,  
788 Tanaka K, Motone F, Kageyama Y, Nozu R, Adachi N, Nishimura O,  
789 Nakagawa R, Tanegashima C, Kiyatake I, Matsumoto R, Murakumo K, Nishida  
790 K, Terakita A, Kuratani S, Sato K, Hyodo S, Kuraku S. 2018b. Shark genomes  
791 provide insights into elasmobranch evolution and the origin of vertebrates. *Nat*  
792 *Ecol Evol* **2**:1761–1771.
- 793 Helmrich A, Stout-Weider K, Hermann K, Schrock E, Heiden T. 2006. Common fragile  
794 sites are conserved features of human and mouse chromosomes and relate to  
795 large active genes. *Genome Res* **16**:1222–1230.
- 796 Hirsh AE, Fraser HB. 2001. Protein dispensability and rate of evolution. *Nature*  
797 **411**:1046–1049.
- 798 Huerta-Cepas J, Dopazo H, Dopazo J, Gabaldón T. 2007. The human phylome. *Genome*  
799 *Biol* **8**:R109.
- 800 Huerta-Cepas J, Serra F, Bork P. 2016. ETE 3: Reconstruction, Analysis, and  
801 Visualization of Phylogenomic Data. *Mol Biol Evol* **33**:1635–1638.
- 802 Hughes JF, Skaletsky H, Brown LG, Pyntikova T, Graves T, Fulton RS, Dugan S, Ding  
803 Y, Buhay CJ, Kremitzki C, Wang Q, Shen H, Holder M, Villasana D, Nazareth  
804 LV, Cree A, Courtney L, Veizer J, Kotkiewicz H, Cho T-J, Koutseva N, Rozen  
805 S, Muzny DM, Warren WC, Gibbs RA, Wilson RK, Page DC. 2012. Strict  
806 evolutionary conservation followed rapid gene loss on human and rhesus Y  
807 chromosomes. *Nature* **483**:82–86.
- 808 Imbeault M, Helleboid P-Y, Trono D. 2017. KRAB zinc-finger proteins contribute to  
809 the evolution of gene regulatory networks. *Nature* **543**:550–554.
- 810 International Chicken Genome Sequencing Consortium. 2004. Sequence and  
811 comparative analysis of the chicken genome provide unique perspectives on  
812 vertebrate evolution. *Nature* **432**:695–716.
- 813 Jordan IK, Rogozin IB, Wolf YI, Koonin EV. 2002. Essential genes are more  
814 evolutionarily conserved than are nonessential genes in bacteria. *Genome Res*  
815 **12**:962–968.

- 816 Kalyaanamoorthy S, Minh BQ, Wong TKF, von Haeseler A, Jermini LS. 2017.  
817 ModelFinder: fast model selection for accurate phylogenetic estimates. *Nat*  
818 *Methods* **14**:587–589.
- 819 Karczewski KJ, Francioli LC, Tiao G, Cummings BB, Alföldi J, Wang Q, Collins RL,  
820 Laricchia KM, Ganna A, Birnbaum DP, Gauthier LD, Brand H, Solomonson M,  
821 Watts NA, Rhodes D, Singer-Berk M, England EM, Seaby EG, Kosmicki JA,  
822 Walters RK, Tashman K, Farjoun Y, Banks E, Poterba T, Wang A, Seed C,  
823 Whiffin N, Chong JX, Samocha KE, Pierce-Hoffman E, Zappala Z, O’Donnell-  
824 Luria AH, Minikel EV, Weisburd B, Lek M, Ware JS, Vittal C, Armean IM,  
825 Bergelson L, Cibulskis K, Connolly KM, Covarrubias M, Donnelly S, Ferreira  
826 S, Gabriel S, Gentry J, Gupta N, Jeandet T, Kaplan D, Llanwarne C, Munshi R,  
827 Novod S, Petrillo N, Roazen D, Ruano-Rubio V, Saltzman A, Schleicher M,  
828 Soto J, Tibbetts K, Tolonen C, Wade G, Talkowski ME, Genome Aggregation  
829 Database Consortium, Neale BM, Daly MJ, MacArthur DG. 2021. Author  
830 Correction: The mutational constraint spectrum quantified from variation in  
831 141,456 humans. *Nature* **590**:E53.
- 832 Katoh K, Standley DM. 2013. MAFFT multiple sequence alignment software version 7:  
833 improvements in performance and usability. *Mol Biol Evol* **30**:772–780.
- 834 Katzman S, Capra JA, Haussler D, Pollard KS. 2011. Ongoing GC-biased evolution is  
835 widespread in the human genome and enriched near recombination hot spots.  
836 *Genome Biol Evol* **3**:614–626.
- 837 Koren A, Polak P, Nemesh J, Michaelson JJ, Sebat J, Sunyaev SR, McCarroll SA. 2012.  
838 Differential relationship of DNA replication timing to different forms of human  
839 mutation and variation. *Am J Hum Genet* **91**:1033–1040.
- 840 Korenberg JR, Rykowski MC. 1988. Human genome organization: Alu, lines, and the  
841 molecular structure of metaphase chromosome bands. *Cell* **53**:391–400.
- 842 Krylov DM, Wolf YI, Rogozin IB, Koonin EV. 2003. Gene loss, protein sequence  
843 divergence, gene dispensability, expression level, and interactivity are correlated  
844 in eukaryotic evolution. *Genome Res* **13**:2229–2235.
- 845 Lewin TD, Royall AH, Holland PWH. 2021. Dynamic Molecular Evolution of  
846 Mammalian Homeobox Genes: Duplication, Loss, Divergence and Gene  
847 Conversion Sculpt PRD Class Repertoires. *J Mol Evol* **89**:396–414.
- 848 Liu G, Yong MYJ, Yurieva M, Srinivasan KG, Liu J, Lim JSY, Poidinger M, Wright  
849 GD, Zolezzi F, Choi H, Pavelka N, Rancati G. 2015. Gene Essentiality Is a  
850 Quantitative Property Linked to Cellular Evolvability. *Cell* **163**:1388–1399.

- 851 MacDonald JR, Ziman R, Yuen RKC, Feuk L, Scherer SW. 2014. The Database of  
852 Genomic Variants: a curated collection of structural variation in the human  
853 genome. *Nucleic Acids Res* **42**:D986-92.
- 854 Maclean CJ, Metzger BPH, Yang J-R, Ho W-C, Moyers B, Zhang J. 2017. Deciphering  
855 the Genic Basis of Yeast Fitness Variation by Simultaneous Forward and  
856 Reverse Genetics. *Mol Biol Evol* **34**:2486–2502.
- 857 Maeso I, Dunwell TL, Wyatt CDR, Marlétaz F, Vető B, Bernal JA, Quah S, Irimia M,  
858 Holland PWH. 2016. Evolutionary origin and functional divergence of totipotent  
859 cell homeobox genes in eutherian mammals. *BMC Biol* **14**:45.
- 860 Medstrand P, van de Lagemaat LN, Mager DL. 2002. Retroelement distributions in the  
861 human genome: variations associated with age and proximity to genes. *Genome*  
862 *Res* **12**:1483–1495.
- 863 Miyata T, Yasunaga T, Nishida T. 1980. Nucleotide sequence divergence and functional  
864 constraint in mRNA evolution. *Proc Natl Acad Sci U S A* **77**:7328–7332.
- 865 Monroe JG, Srikant T, Carbonell-Bejerano P, Becker C, Lensink M, Exposito-Alonso  
866 M, Klein M, Hildebrandt J, Neumann M, Kliebenstein D, Weng M-L, Imbert E,  
867 Ågren J, Rutter MT, Fenster CB, Weigel D. 2022. Mutation bias reflects natural  
868 selection in *Arabidopsis thaliana*. *Nature* **602**:101–105.
- 869 Moyers BA, Zhang J. 2015. Phylostratigraphic bias creates spurious patterns of genome  
870 evolution. *Mol Biol Evol* **32**:258–267.
- 871 Nakatani Y, Shingate P, Ravi V, Pillai NE, Prasad A, McLysaght A, Venkatesh B.  
872 2021. Reconstruction of proto-vertebrate, proto-cyclostome and proto-  
873 gnathostome genomes provides new insights into early vertebrate evolution. *Nat*  
874 *Commun* **12**:4489.
- 875 Nguyen L-T, Schmidt HA, von Haeseler A, Minh BQ. 2015. IQ-TREE: a fast and  
876 effective stochastic algorithm for estimating maximum-likelihood phylogenies.  
877 *Mol Biol Evol* **32**:268–274.
- 878 Nurk S, Koren S, Rhie A, Rautiainen M, Bzikadze AV, Mikheenko A, Vollger MR,  
879 Altomose N, Uralsky L, Gershman A, Aganezov S, Hoyt SJ, Diekhans M,  
880 Logsdon GA, Alonge M, Antonarakis SE, Borchers M, Bouffard GG, Brooks  
881 SY, Caldas GV, Chen N-C, Cheng H, Chin C-S, Chow W, de Lima LG, Dishuck  
882 PC, Durbin R, Dvorkina T, Fiddes IT, Formenti G, Fulton RS, Functamman  
883 A, Garrison E, Grady PGS, Graves-Lindsay TA, Hall IM, Hansen NF, Hartley  
884 GA, Haukness M, Howe K, Hunkapiller MW, Jain C, Jain M, Jarvis ED,  
885 Kerpedjiev P, Kirsche M, Kolmogorov M, Korlach J, Kremitzki M, Li H,  
886 Maduro VV, Marschall T, McCartney AM, McDaniel J, Miller DE, Mullikin JC,

- 887 Myers EW, Olson ND, Paten B, Peluso P, Pevzner PA, Porubsky D, Potapova T,  
888 Rogaev EI, Rosenfeld JA, Salzberg SL, Schneider VA, Sedlazeck FJ, Shafin K,  
889 Shew CJ, Shumate A, Sims Y, Smit AFA, Soto DC, Sović I, Storer JM, Streets  
890 A, Sullivan BA, Thibaud-Nissen F, Torrance J, Wagner J, Walenz BP, Wenger  
891 A, Wood JMD, Xiao C, Yan SM, Young AC, Zarate S, Surti U, McCoy RC,  
892 Dennis MY, Alexandrov IA, Gerton JL, O'Neill RJ, Timp W, Zook JM, Schatz  
893 MC, Eichler EE, Miga KH, Phillippy AM. 2022. The complete sequence of a  
894 human genome. *Science* **376**:44–53.
- 895 O'Geen H, Squazzo SL, Iyengar S, Blahnik K, Rinn JL, Chang HY, Green R, Farnham  
896 PJ. 2007. Genome-wide analysis of KAP1 binding suggests autoregulation of  
897 KRAB-ZNFs. *PLoS Genet* **3**:e89.
- 898 Olson MV. 1999. When less is more: gene loss as an engine of evolutionary change. *Am*  
899 *J Hum Genet* **64**:18–23.
- 900 Pál C, Papp B, Lercher MJ. 2006. An integrated view of protein evolution. *Nat Rev*  
901 *Genet* **7**:337–348.
- 902 Paradis E, Schliep K. 2019. ape 5.0: an environment for modern phylogenetics and  
903 evolutionary analyses in R. *Bioinformatics* **35**:526–528.
- 904 Rangasamy D. 2013. Distinctive patterns of epigenetic marks are associated with  
905 promoter regions of mouse LINE-1 and LTR retrotransposons. *Mob DNA* **4**:27.
- 906 Rao SSP, Huntley MH, Durand NC, Stamenova EK, Bochkov ID, Robinson JT,  
907 Sanborn AL, Machol I, Omer AD, Lander ES, Aiden EL. 2014. A 3D map of the  
908 human genome at kilobase resolution reveals principles of chromatin looping.  
909 *Cell* **159**:1665–1680.
- 910 Rice AM, McLysaght A. 2017. Dosage sensitivity is a major determinant of human  
911 copy number variant pathogenicity. *Nat Commun* **8**:14366.
- 912 Roux J, Liu J, Robinson-Rechavi M. 2017. Selective Constraints on Coding Sequences  
913 of Nervous System Genes Are a Major Determinant of Duplicate Gene  
914 Retention in Vertebrates. *Mol Biol Evol* **34**:2773–2791.
- 915 Schaible VM, Zawistowski M, Wegmann D, Ehm MG, Nelson MR, St Jean PL,  
916 Abecasis GR, Novembre J, Zöllner S, Li JZ. 2013. The influence of genomic  
917 context on mutation patterns in the human genome inferred from rare variants.  
918 *Genome Res* **23**:1974–1984.
- 919 Schield DR, Card DC, Hales NR, Perry BW, Pasquesi GM, Blackmon H, Adams RH,  
920 Corbin AB, Smith CF, Ramesh B, Demuth JP, Betrán E, Tollis M, Meik JM,  
921 Mackessy SP, Castoe TA. 2019. The origins and evolution of chromosomes,

- 922 dosage compensation, and mechanisms underlying venom regulation in snakes.  
923 *Genome Res* **29**:590–601.
- 924 Seplyarskiy VB, Sunyaev S. 2021. The origin of human mutation in light of genomic  
925 data. *Nat Rev Genet* **22**:672–686.
- 926 Sharma V, Hecker N, Roscito JG, Foerster L, Langer BE, Hiller M. 2018. A genomics  
927 approach reveals insights into the importance of gene losses for mammalian  
928 adaptations. *Nat Commun* **9**:1215.
- 929 Shen X-X, Opulente DA, Kominek J, Zhou X, Steenwyk JL, Buh KV, Haase MAB,  
930 Wisecaver JH, Wang M, Doering DT, Boudouris JT, Schneider RM, Langdon  
931 QK, Ohkuma M, Endoh R, Takashima M, Manabe R-I, Čadež N, Libkind D,  
932 Rosa CA, DeVirgilio J, Hulfachor AB, Groenewald M, Kurtzman CP, Hittinger  
933 CT, Rokas A. 2018. Tempo and Mode of Genome Evolution in the Budding  
934 Yeast Subphylum. *Cell* **175**:1533–1545.e20.
- 935 Sherry ST, Ward MH, Kholodov M, Baker J, Phan L, Smigielski EM, Sirotkin K. 2001.  
936 dbSNP: the NCBI database of genetic variation. *Nucleic Acids Res* **29**:308–311.
- 937 Simakov O, Marlétaz F, Yue J-X, O’Connell B, Jenkins J, Brandt A, Calef R, Tung C-  
938 H, Huang T-K, Schmutz J, Satoh N, Yu J-K, Putnam NH, Green RE, Rokhsar  
939 DS. 2020. Deeply conserved synteny resolves early events in vertebrate  
940 evolution. *Nat Ecol Evol* **4**:820–830.
- 941 Simão FA, Waterhouse RM, Ioannidis P, Kriventseva EV, Zdobnov EM. 2015.  
942 BUSCO: assessing genome assembly and annotation completeness with single-  
943 copy orthologs. *Bioinformatics* **31**:3210–3212.
- 944 Slotkin RK, Martienssen R. 2007. Transposable elements and the epigenetic regulation  
945 of the genome. *Nat Rev Genet* **8**:272–285.
- 946 Stamatoyannopoulos JA, Adzhubei I, Thurman RE, Kryukov GV, Mirkin SM, Sunyaev  
947 SR. 2009. Human mutation rate associated with DNA replication timing. *Nat*  
948 *Genet* **41**:393–395.
- 949 Steinegger M, Söding J. 2017. MMseqs2 enables sensitive protein sequence searching  
950 for the analysis of massive data sets. *Nat Biotechnol* **35**:1026–1028.
- 951 Terekhanova NV, Seplyarskiy VB, Soldatov RA, Bazykin GA. 2017. Evolution of  
952 Local Mutation Rate and Its Determinants. *Mol Biol Evol* **34**:1100–1109.
- 953 Trapnell C, Roberts A, Goff L, Pertea G, Kim D, Kelley DR, Pimentel H, Salzberg SL,  
954 Rinn JL, Pachter L. 2012. Differential gene and transcript expression analysis of  
955 RNA-seq experiments with TopHat and Cufflinks. *Nat Protoc* **7**:562–578.
- 956 Underwood CJ, Henderson IR, Martienssen RA. 2017. Genetic and epigenetic variation  
957 of transposable elements in Arabidopsis. *Curr Opin Plant Biol* **36**:135–141.



- 958 van Schaik T, Vos M, Peric-Hupkes D, Hn Celie P, van Steensel B. 2020. Cell cycle  
959 dynamics of lamina-associated DNA. *EMBO Rep* **21**:e50636.
- 960 van Steensel B, Belmont AS. 2017. Lamina-Associated Domains: Links with  
961 Chromosome Architecture, Heterochromatin, and Gene Repression. *Cell*  
962 **169**:780–791.
- 963 Vogel MJ, Guelen L, de Wit E, Peric-Hupkes D, Lodén M, Talhout W, Feenstra M,  
964 Abbas B, Classen A-K, van Steensel B. 2006. Human heterochromatin proteins  
965 form large domains containing KRAB-ZNF genes. *Genome Res* **16**:1493–1504.
- 966 Yang J, Gu Z, Li W-H. 2003. Rate of protein evolution versus fitness effect of gene  
967 deletion. *Mol Biol Evol* **20**:772–774.
- 968 Yang Z. 2007. PAML 4: phylogenetic analysis by maximum likelihood. *Mol Biol Evol*  
969 **24**:1586–1591.
- 970 Yoshihara M, Jiang L, Akatsuka S, Suyama M, Toyokuni S. 2014. Genome-wide  
971 profiling of 8-oxoguanine reveals its association with spatial positioning in  
972 nucleus. *DNA Res* **21**:603–612.
- 973 Zheng X, Hu J, Yue S, Kristiani L, Kim M, Sauria M, Taylor J, Kim Y, Zheng Y. 2018.  
974 Lamins Organize the Global Three-Dimensional Genome from the Nuclear  
975 Periphery. *Mol Cell* **71**:802-815.e7.

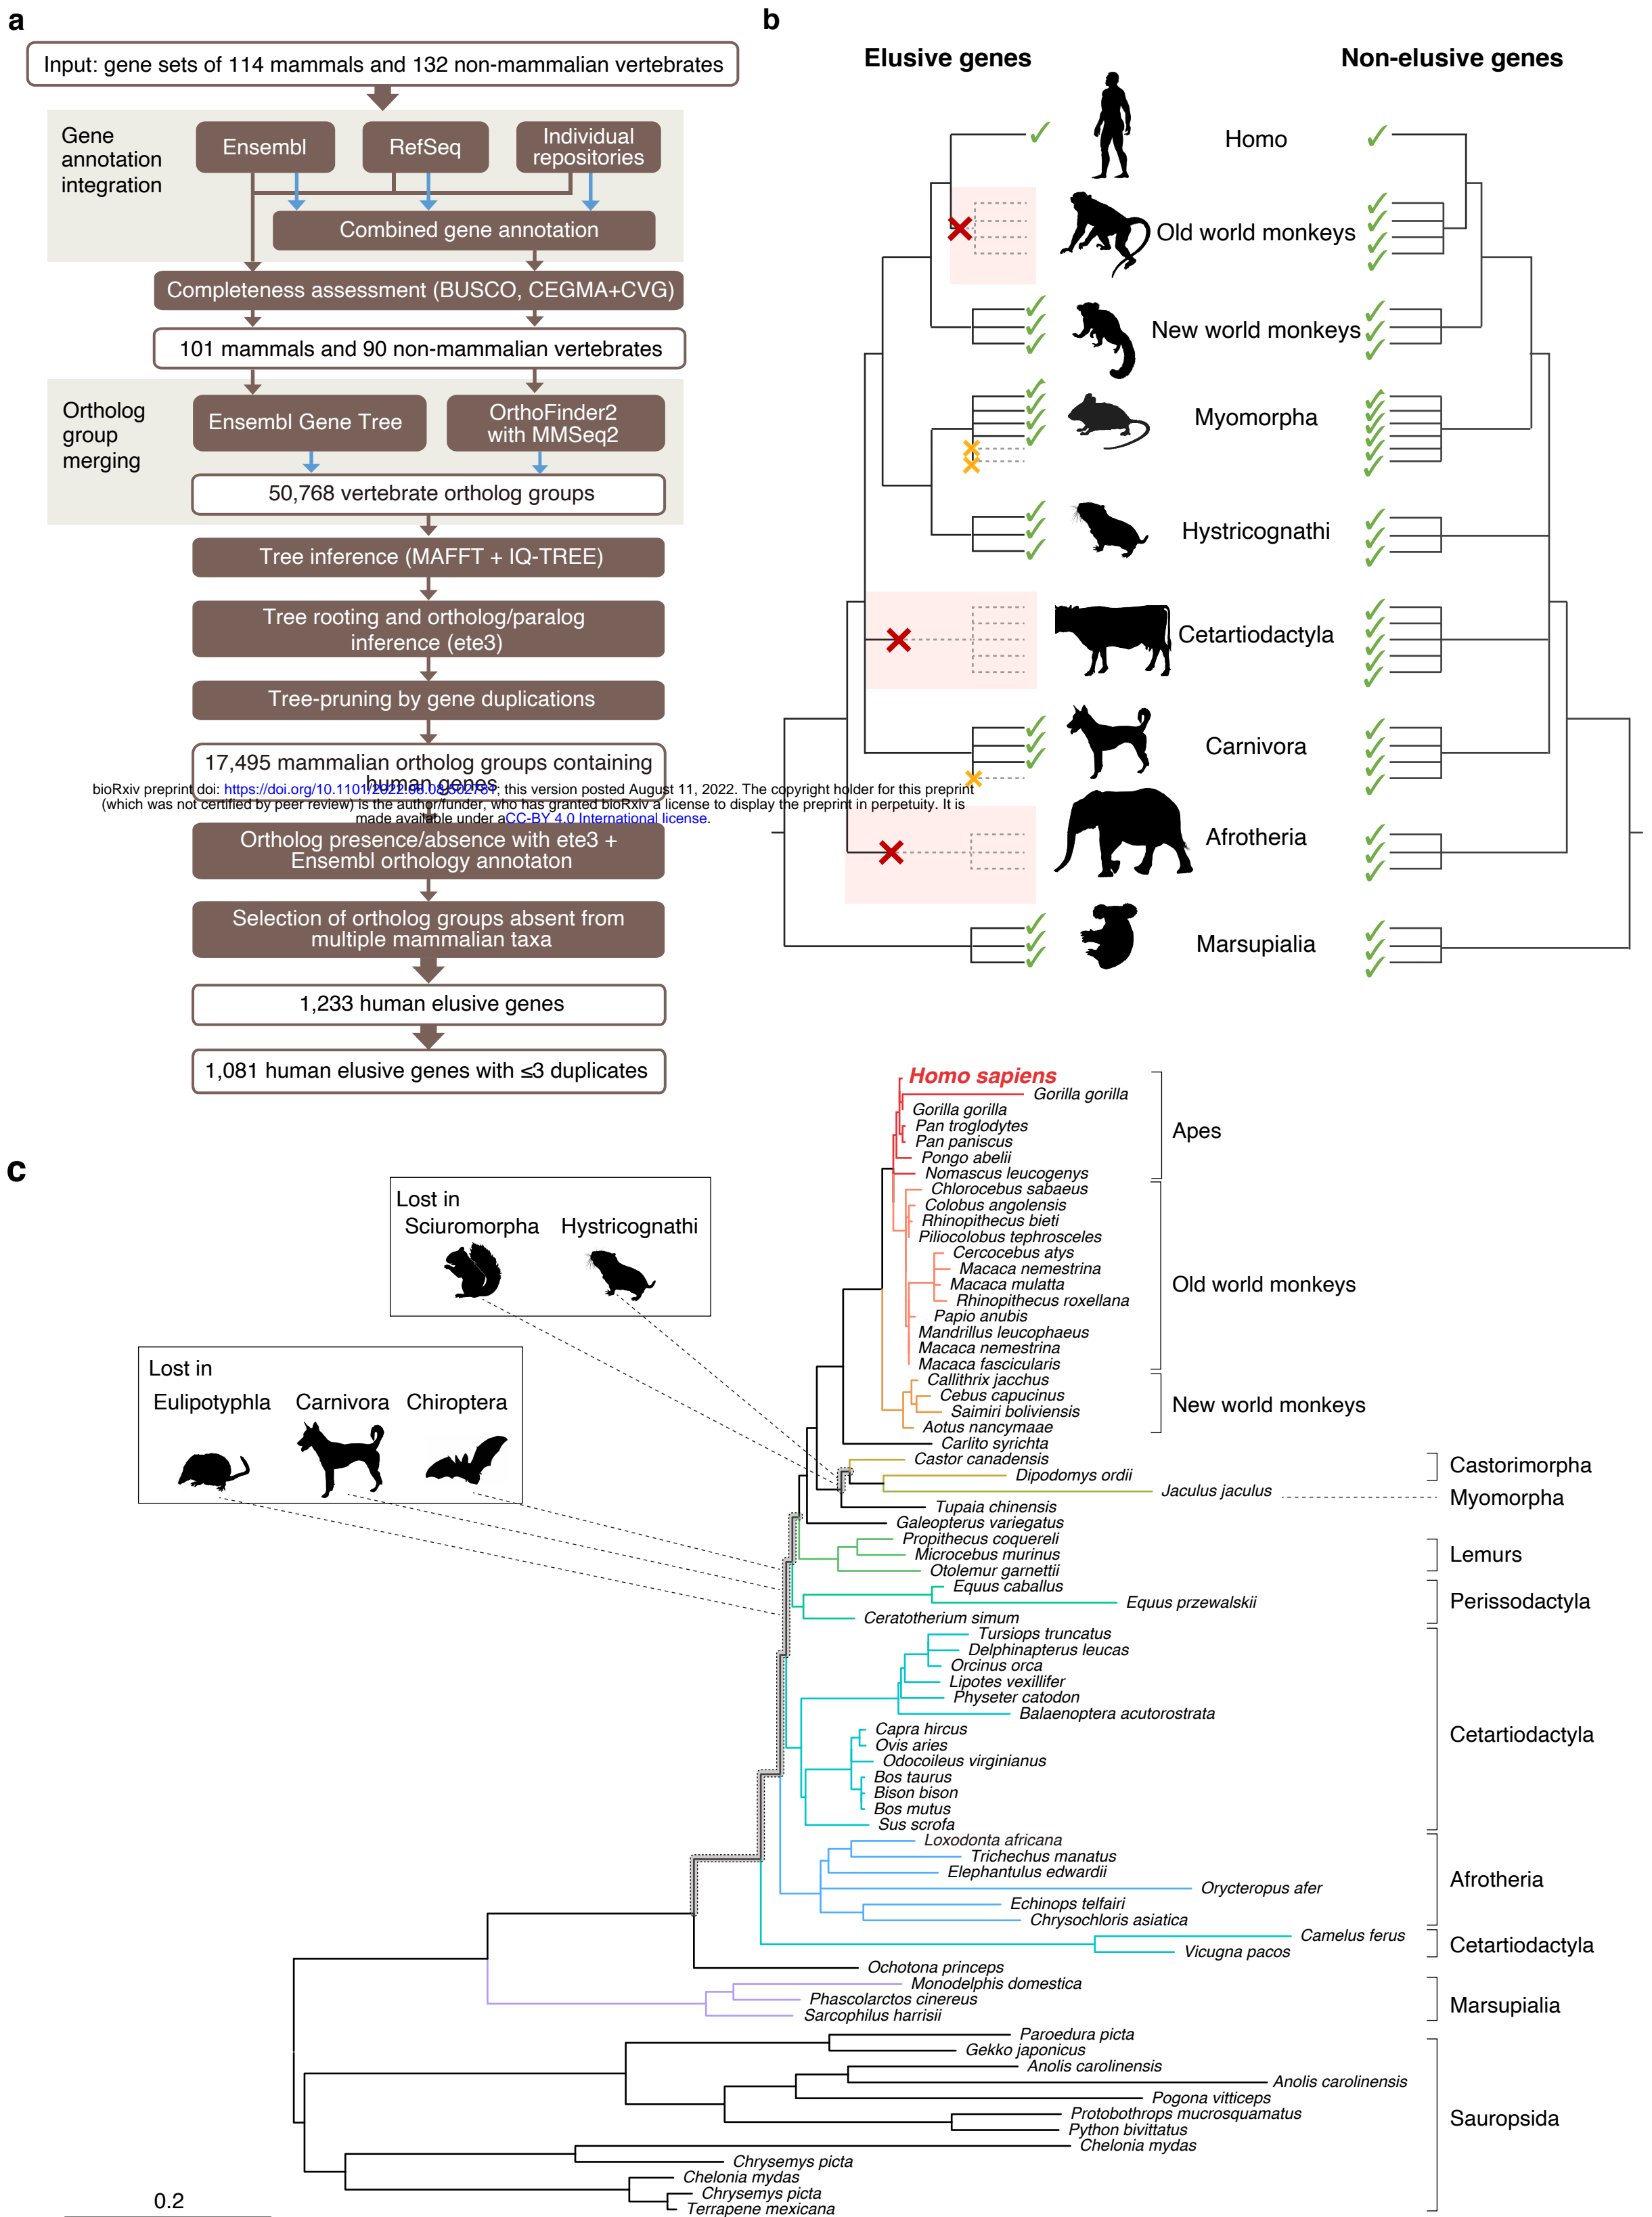



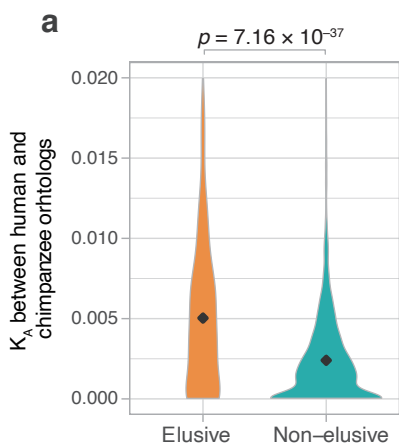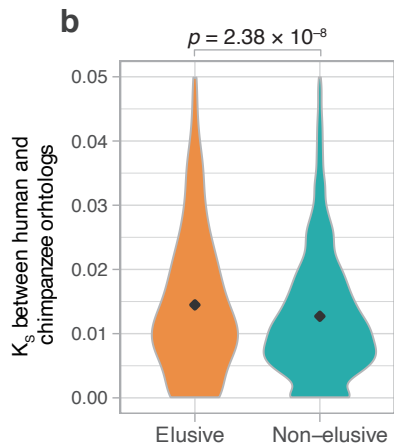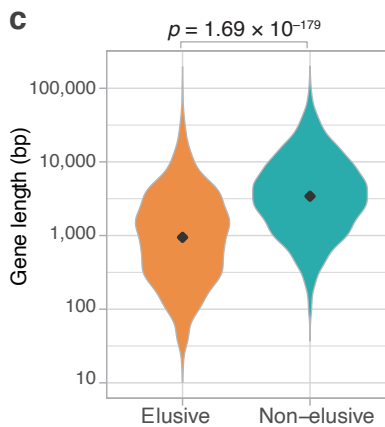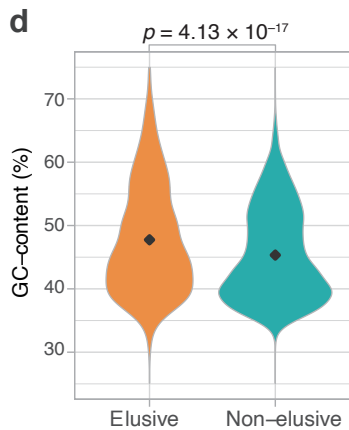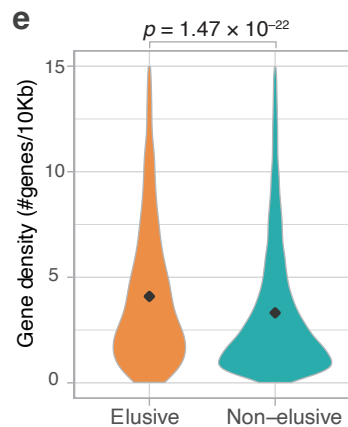

**Figure 2**

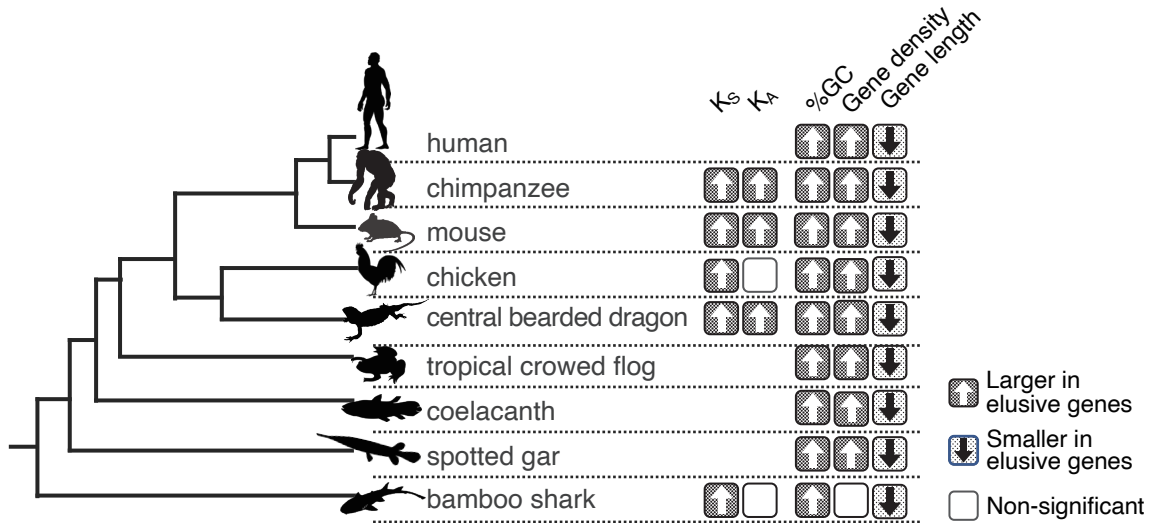

**Figure 3**

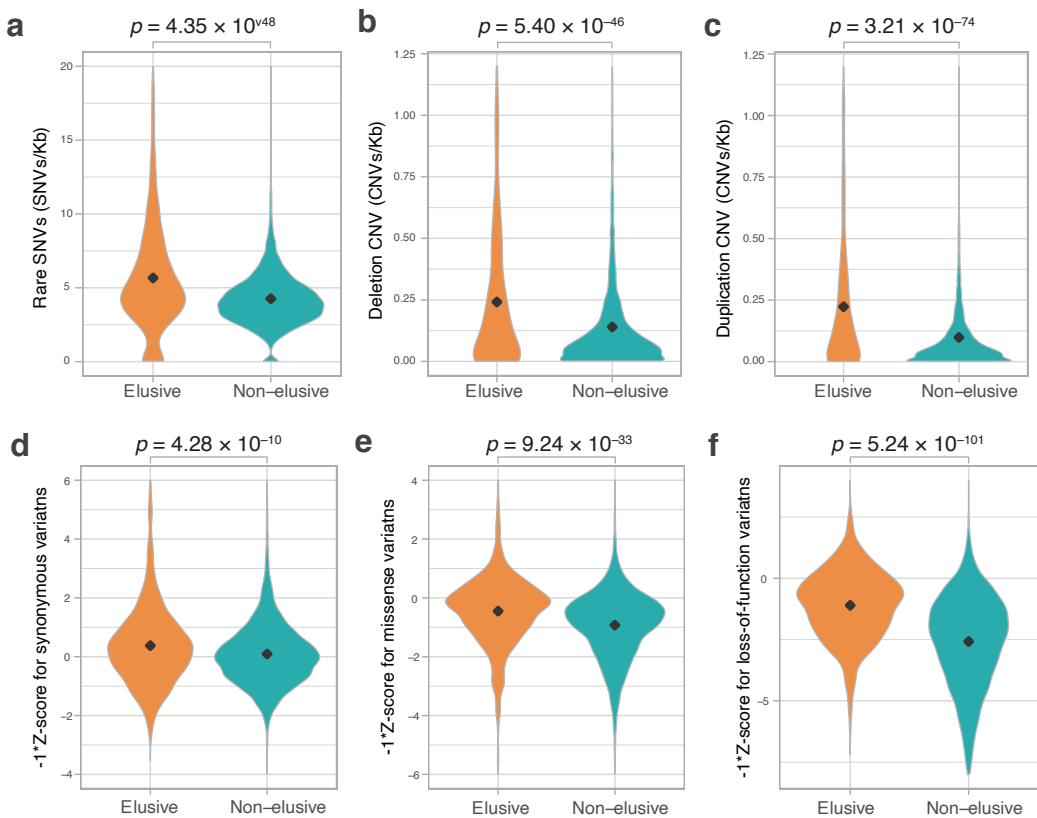

**Figure 4**

## Adults

### Non-elusive genes

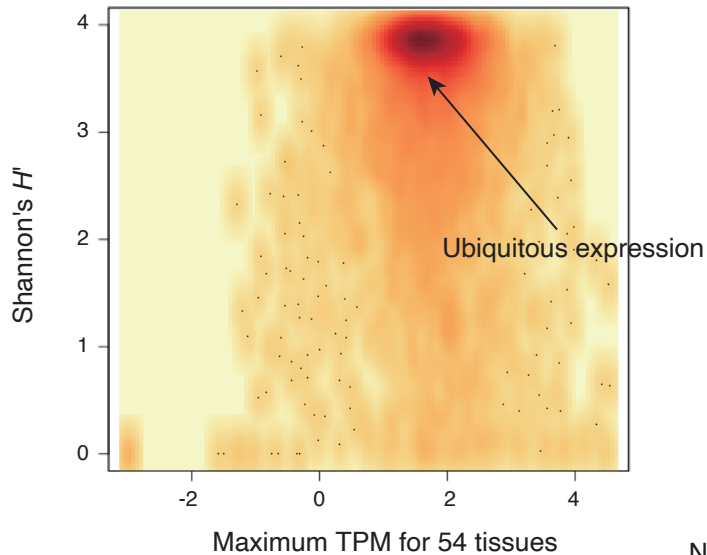

### Elusive genes

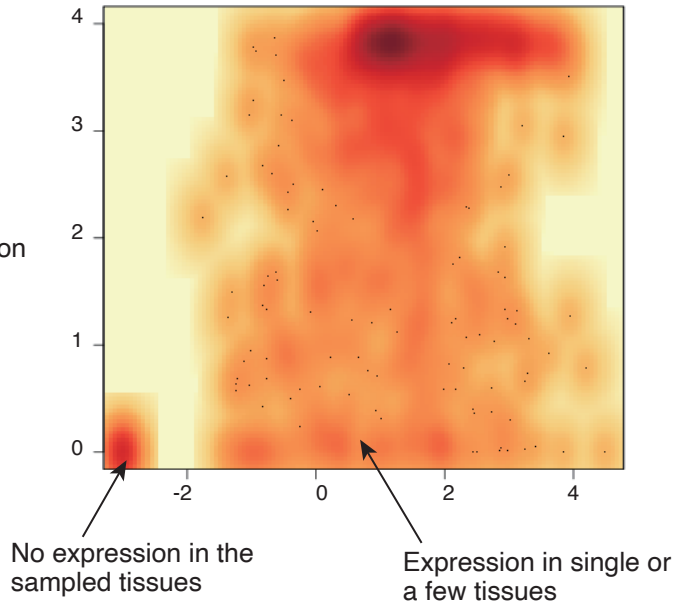

## Fetuses

### Non-elusive genes

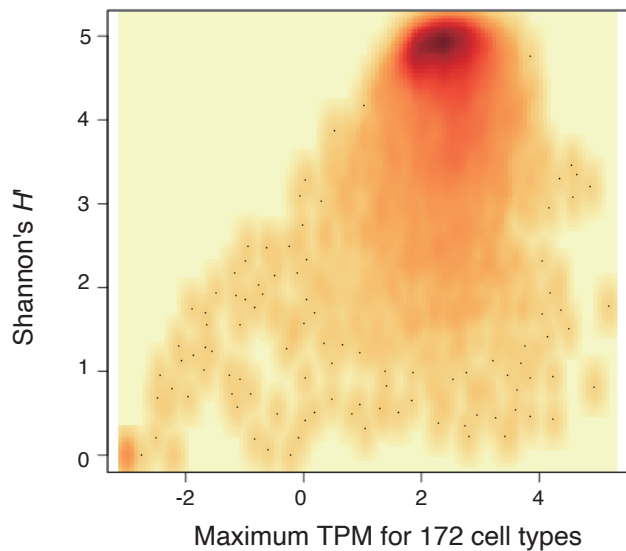

### Elusive genes

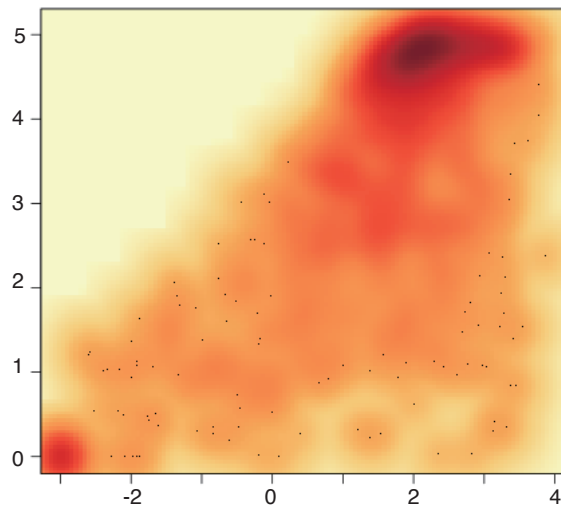

**Figure 5**

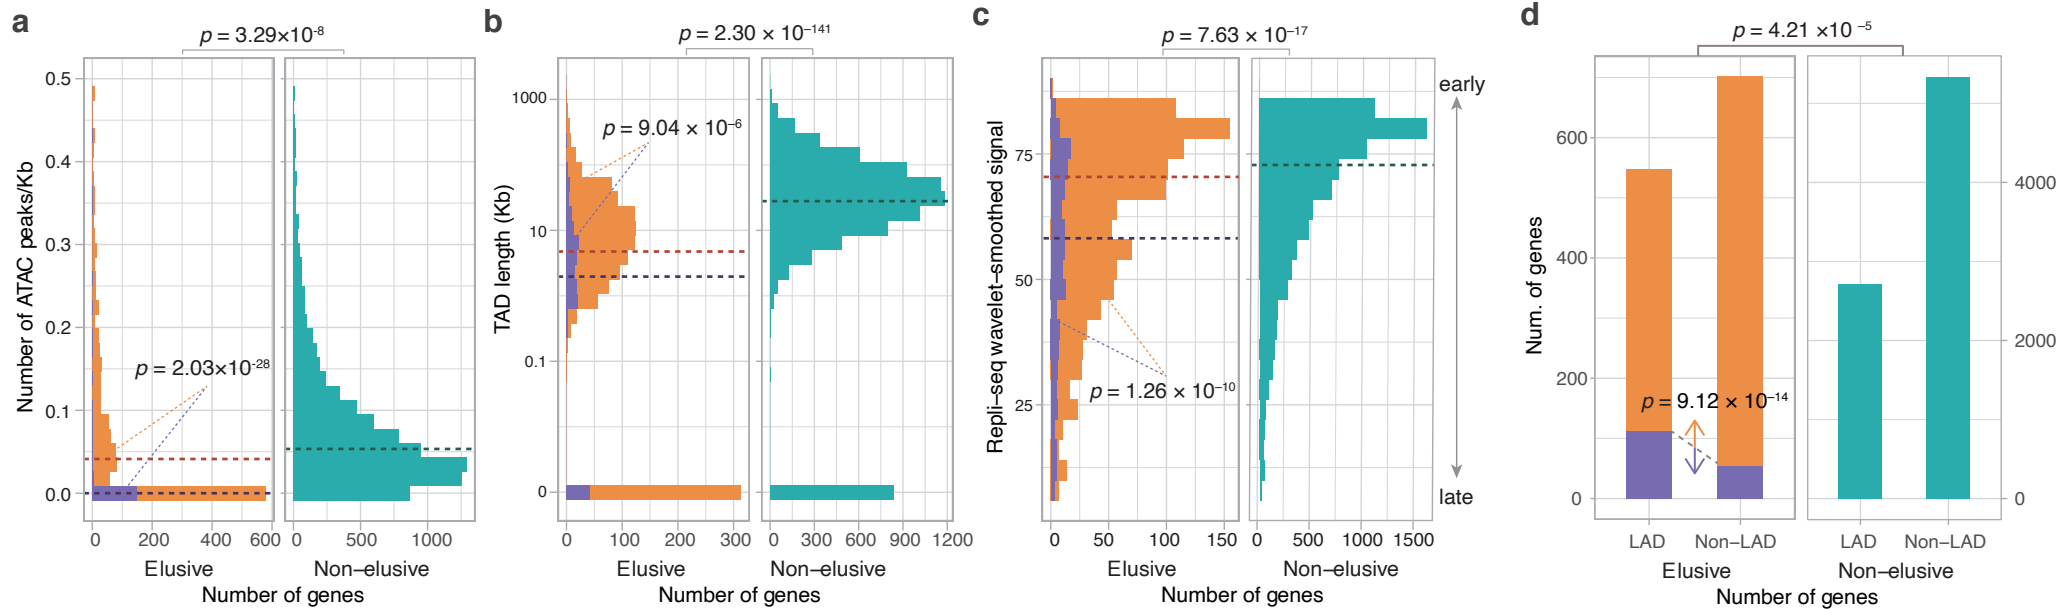

**Figure 6**

**a**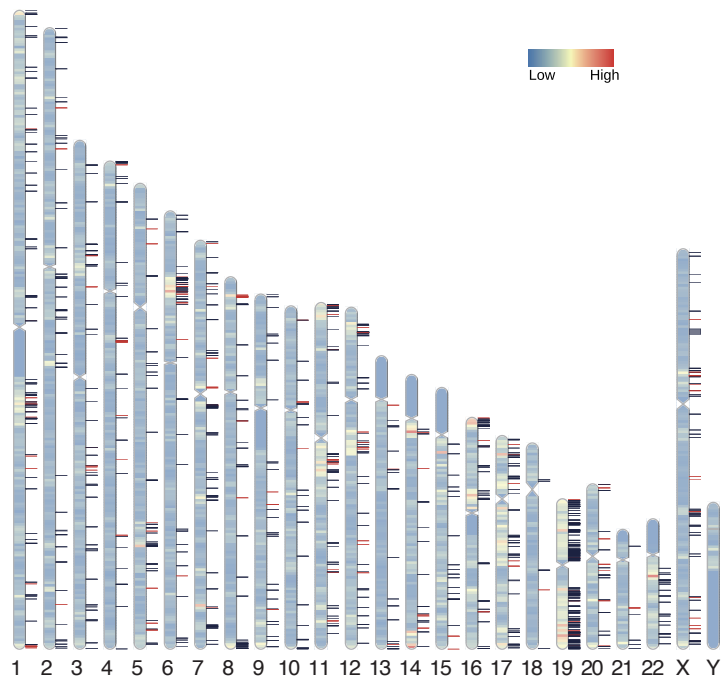**b**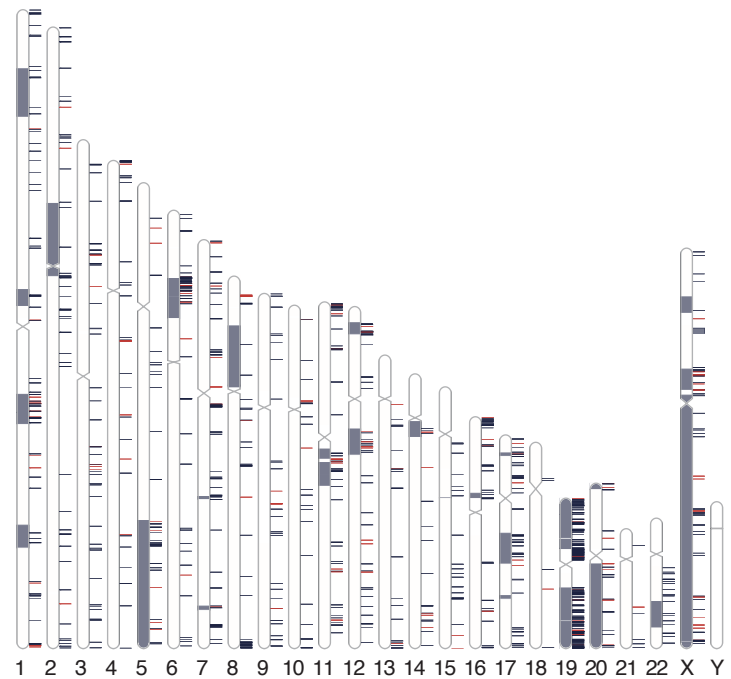**Figure 7**

Human-mouse ortholog pairs

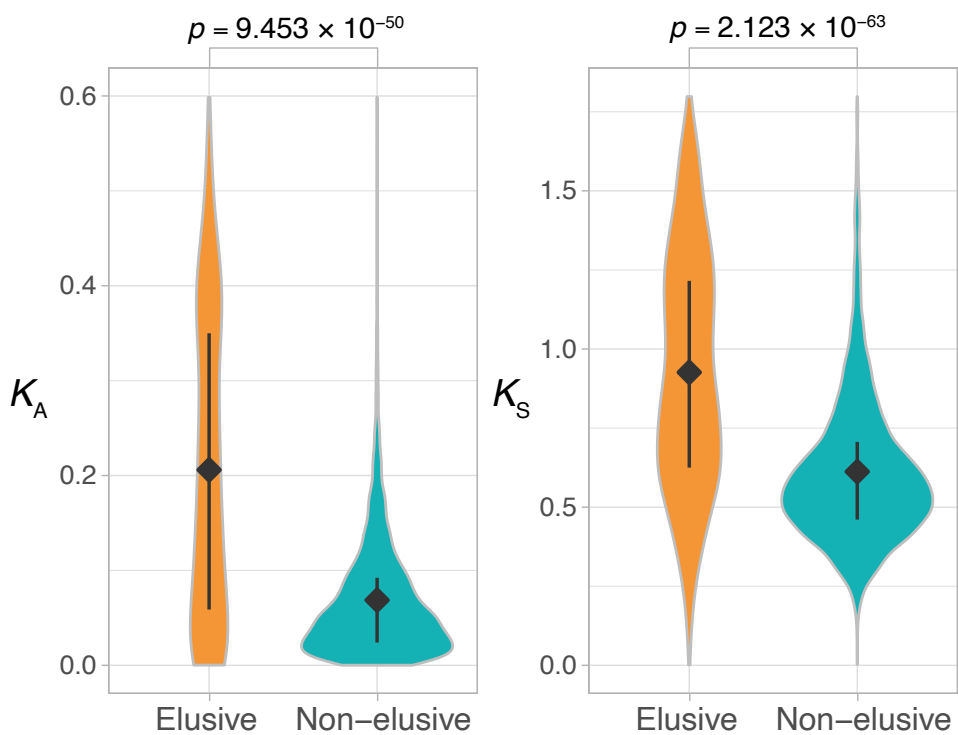

Chicken-Turkey ortholog pairs

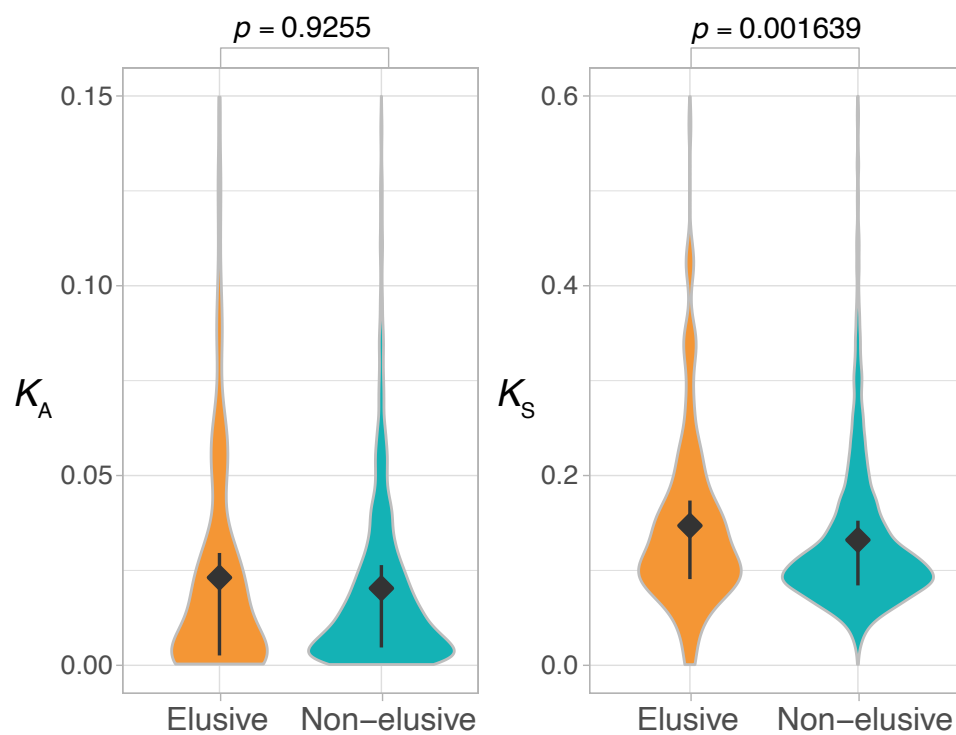

Central bearded dragon-green snole ortholog pairs

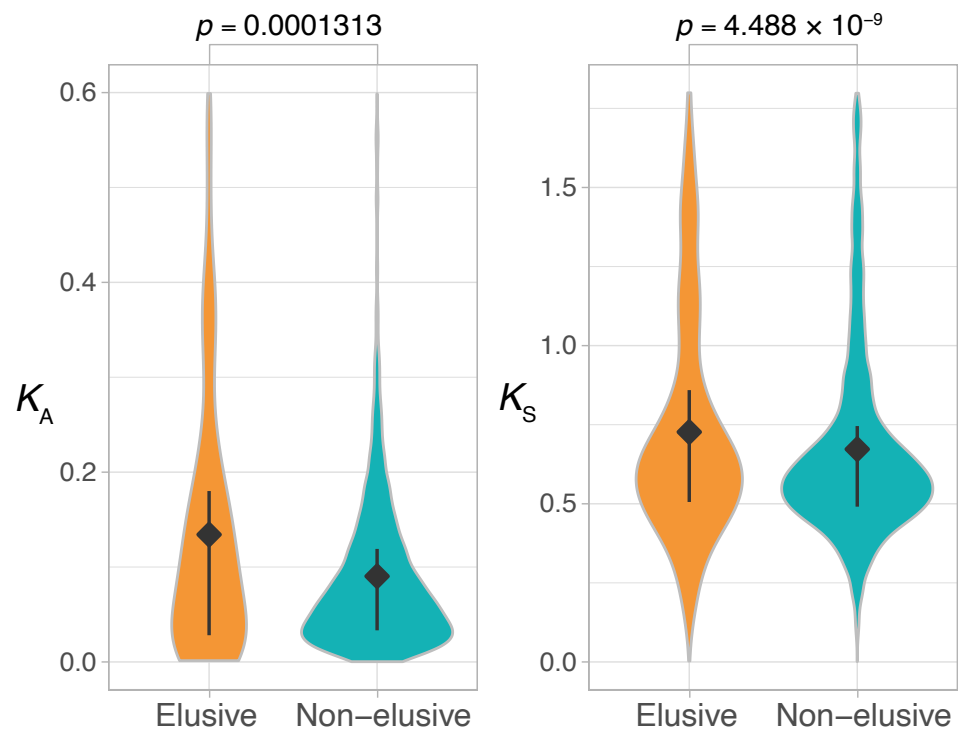

Bamboo shark-whale shark ortholog pairs

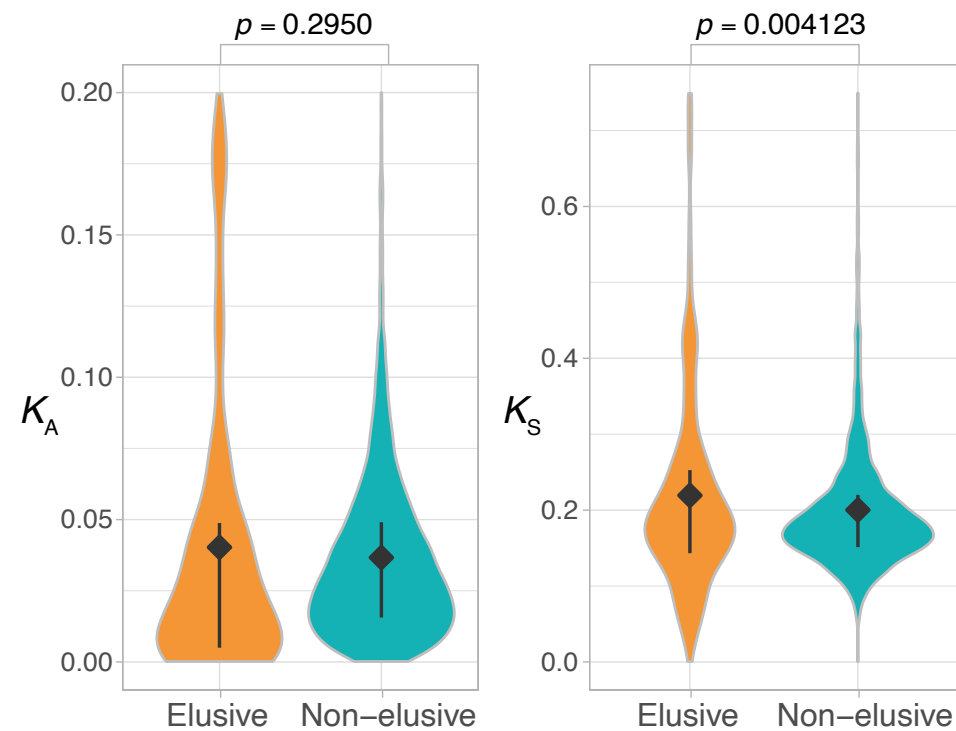

Figure 2-figure supplement 1

**a**

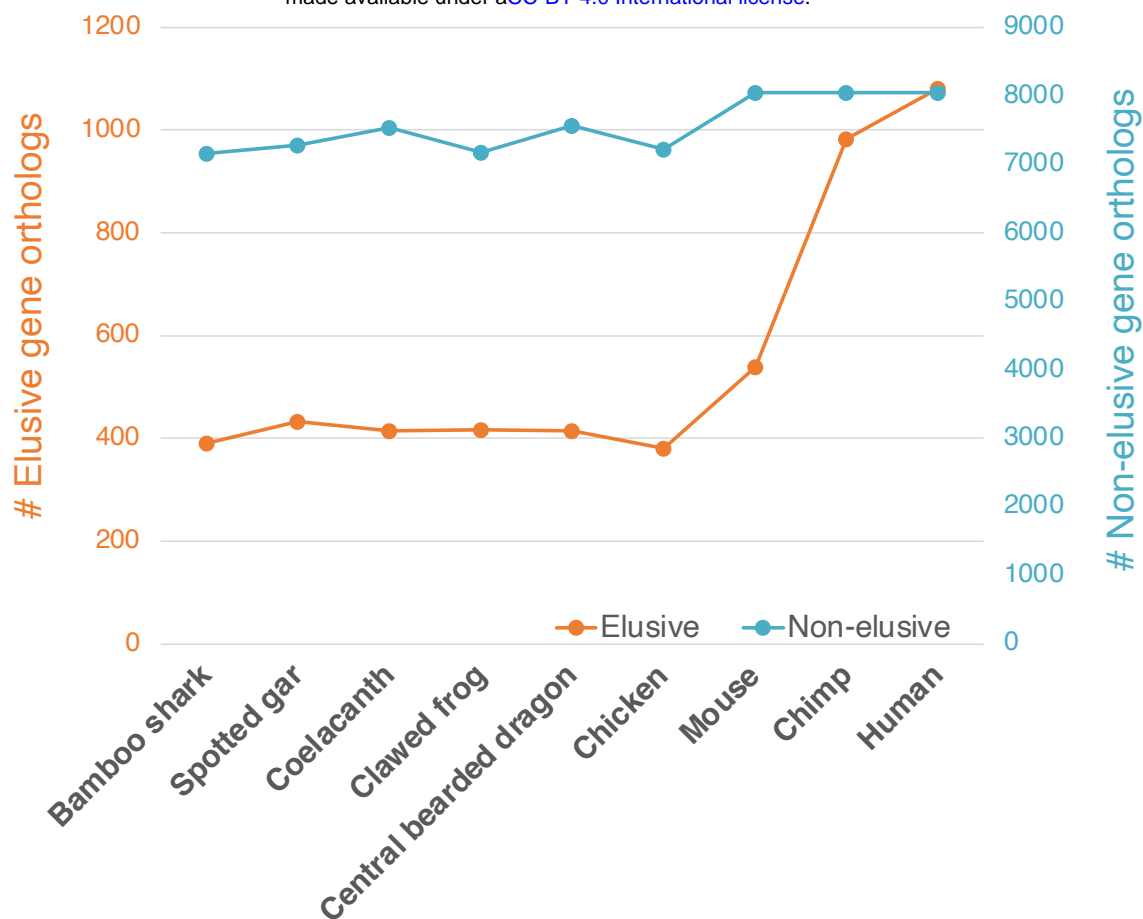

**b**

**Elusive gene orthologs**

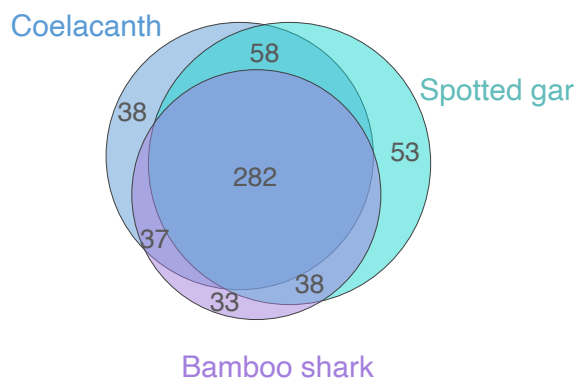

**Non-elusive gene orthologs**

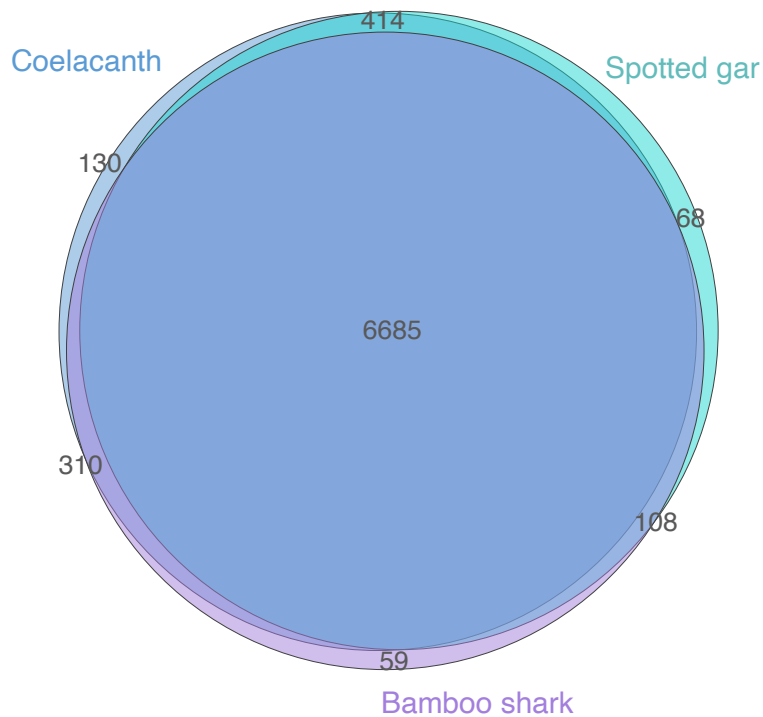

|                   | 3 species | 1 or 2 species |
|-------------------|-----------|----------------|
| Elusive genes     | 282       | 257            |
| Non-elusive genes | 6685      | 1089           |

**Figure 3–figure supplement 1**



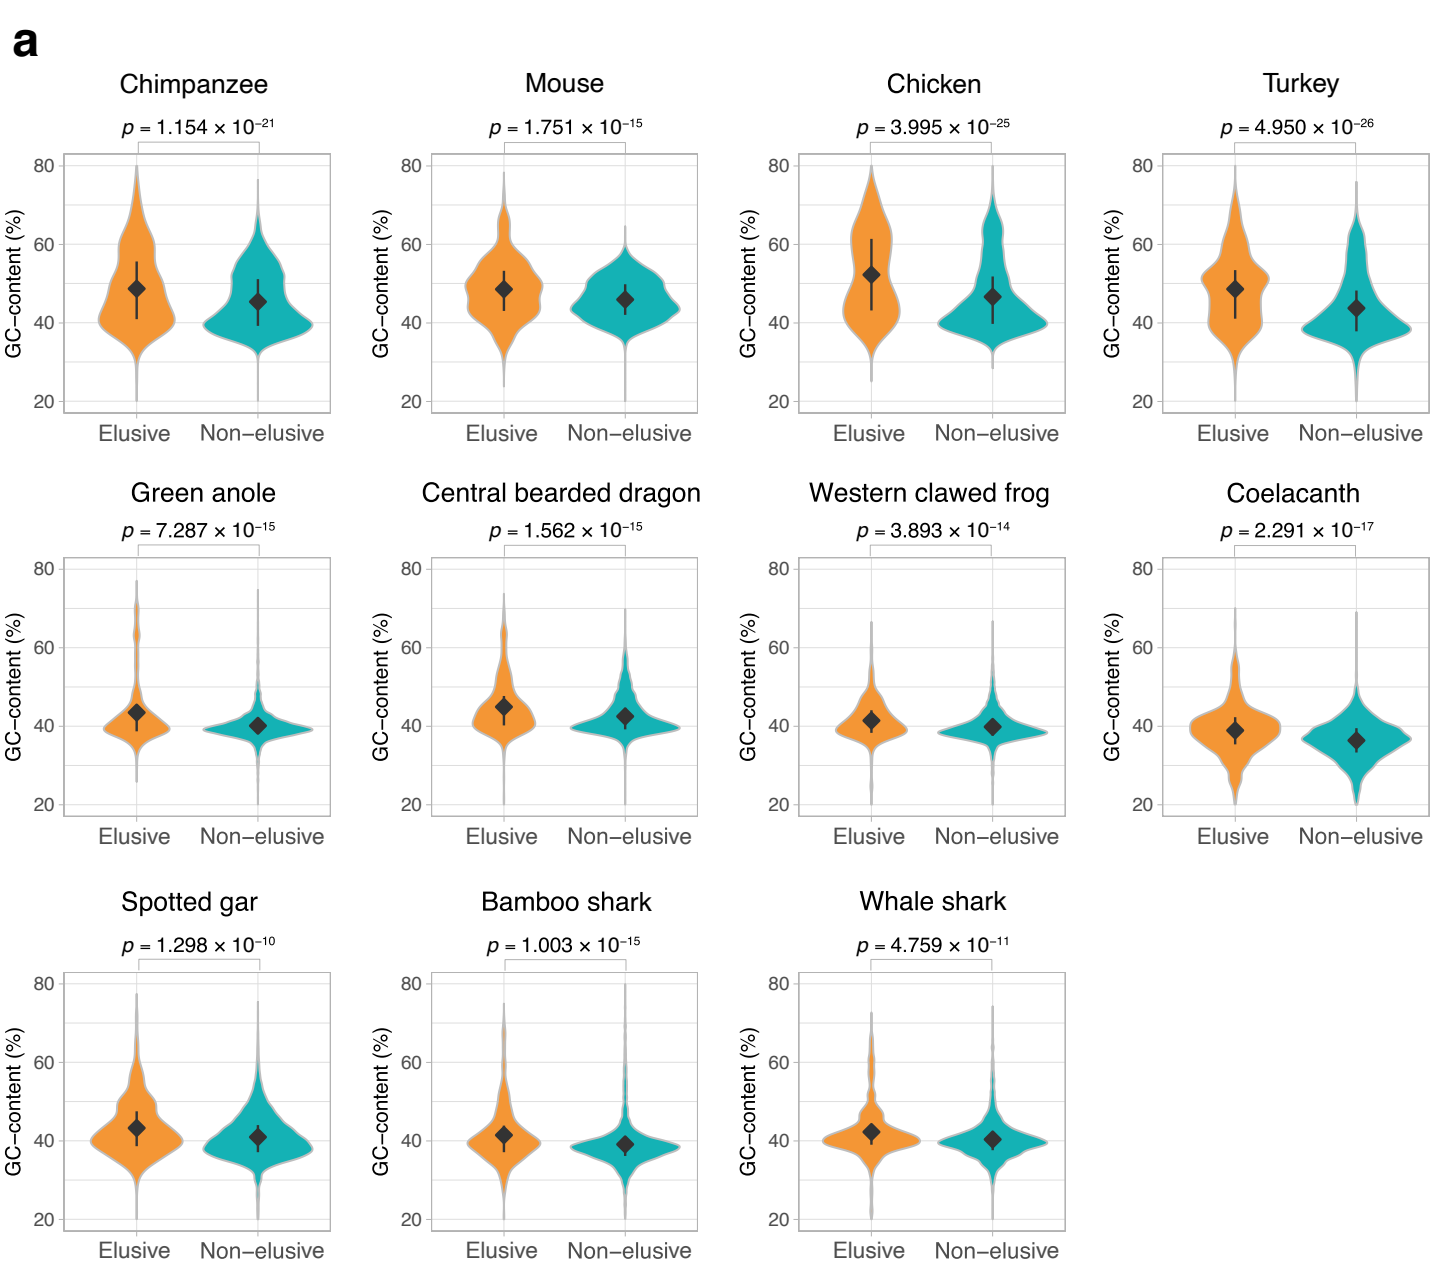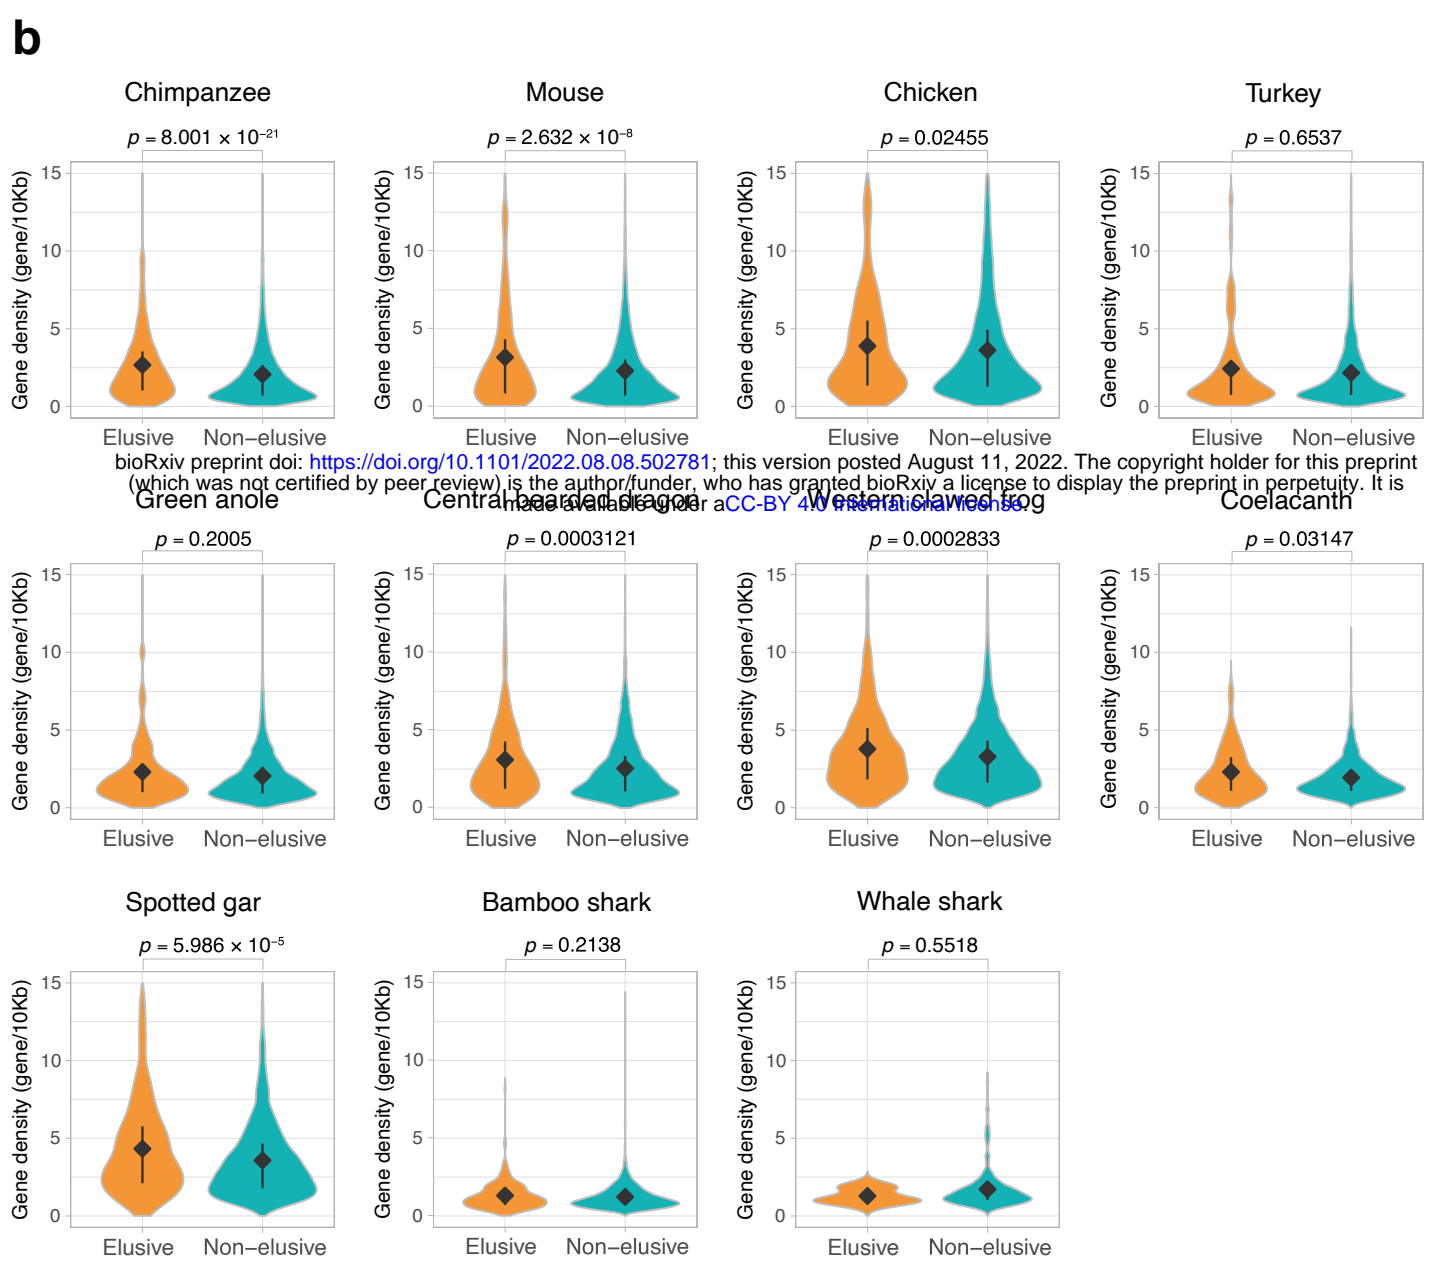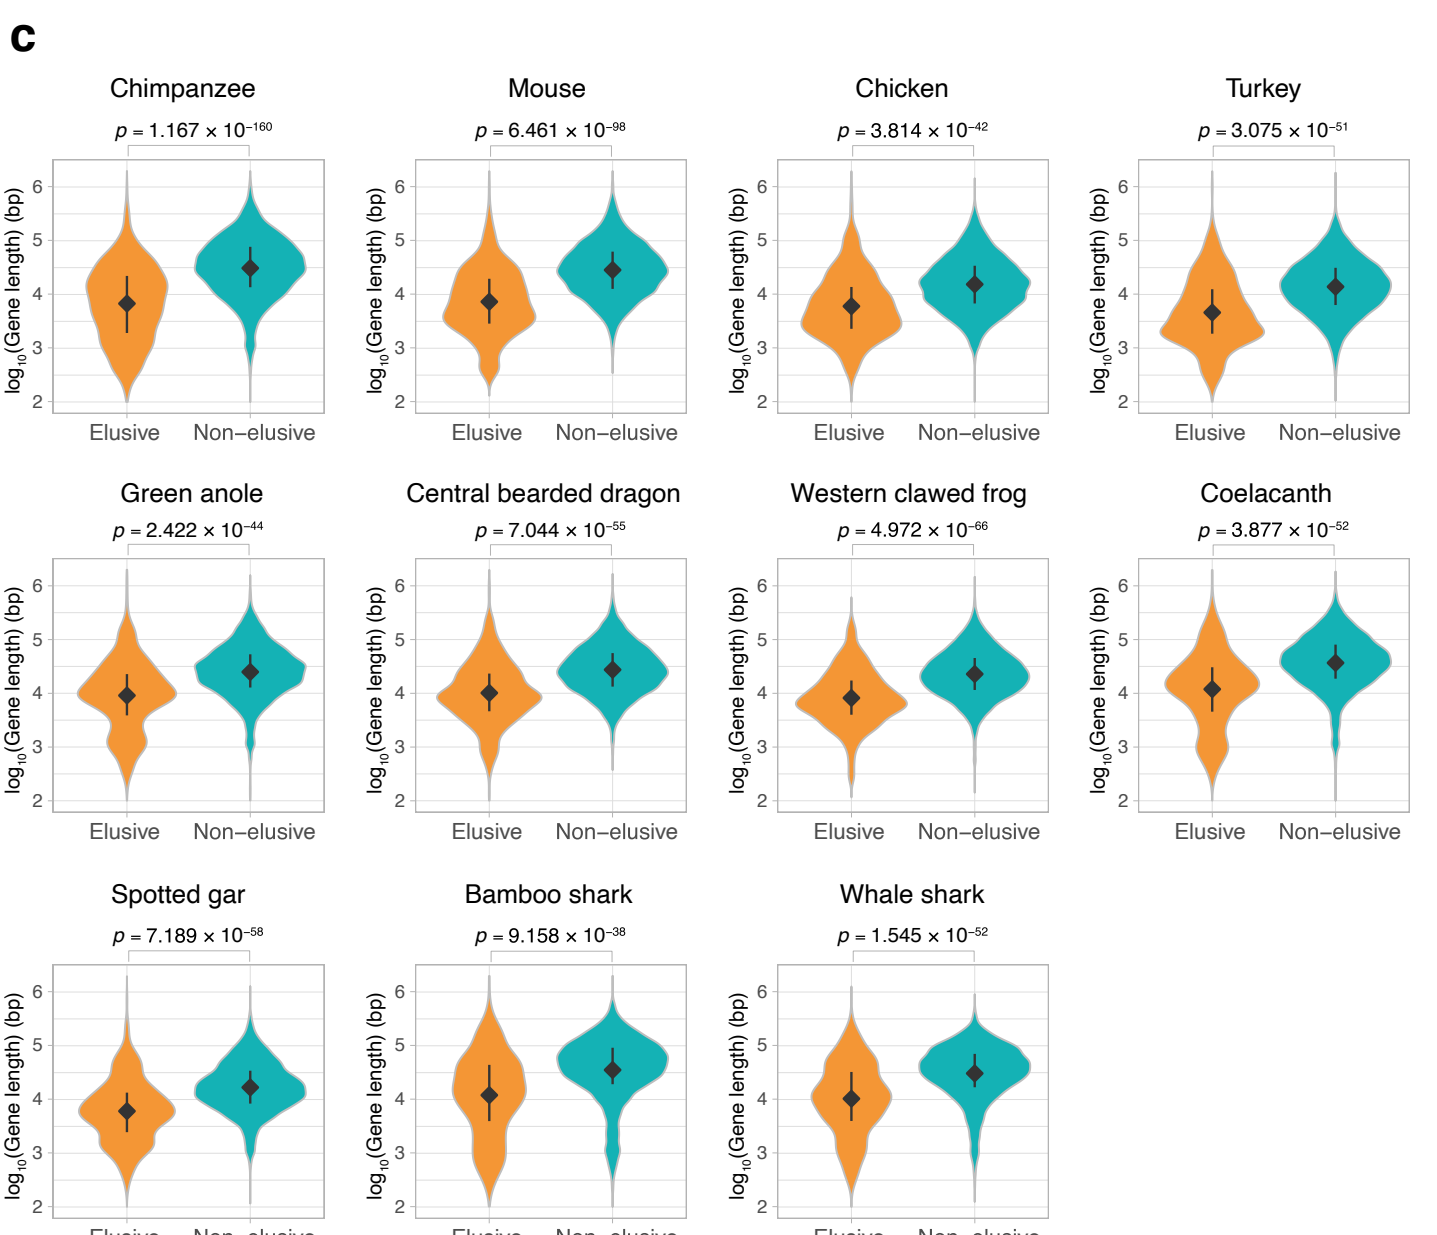

**Figure 3—figure supplement 2**

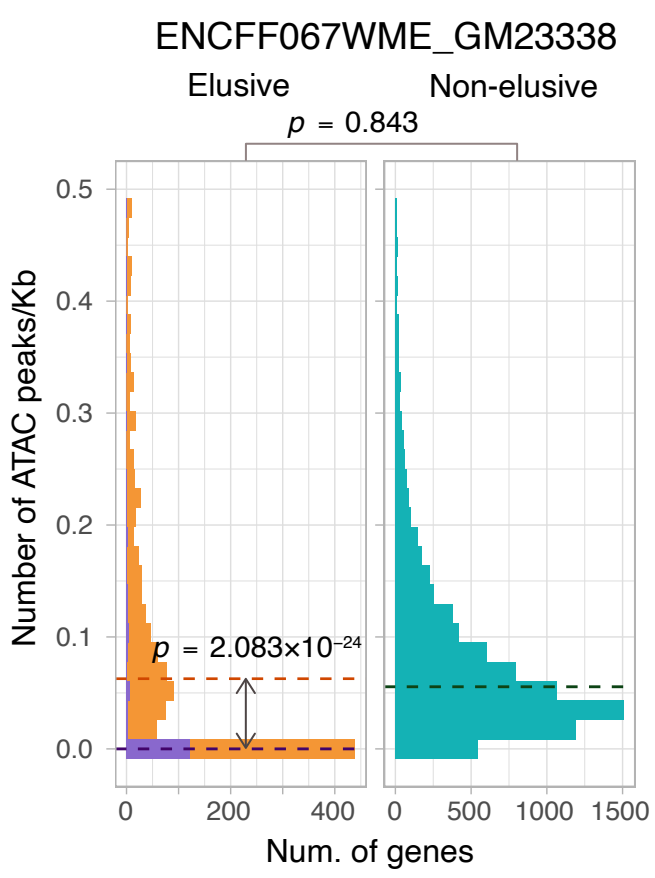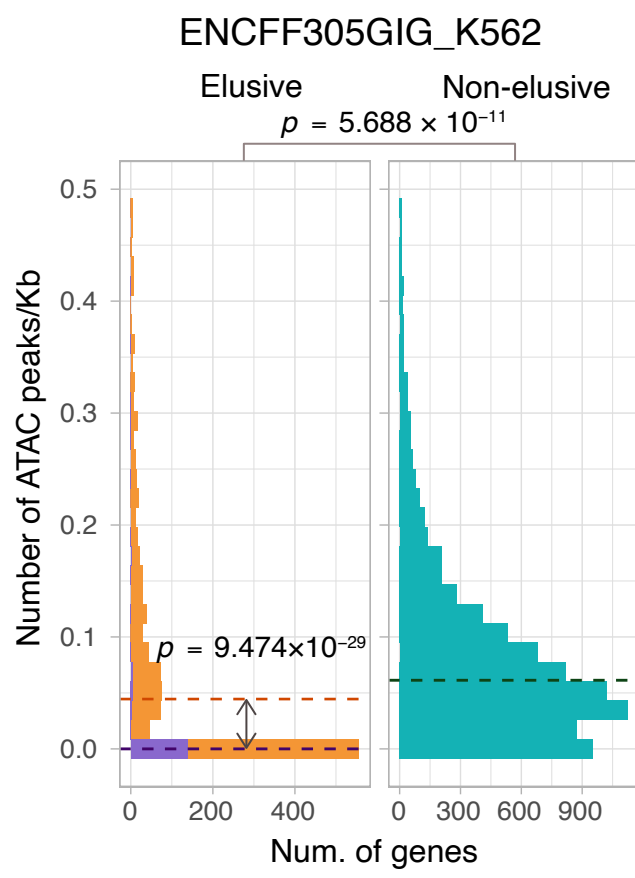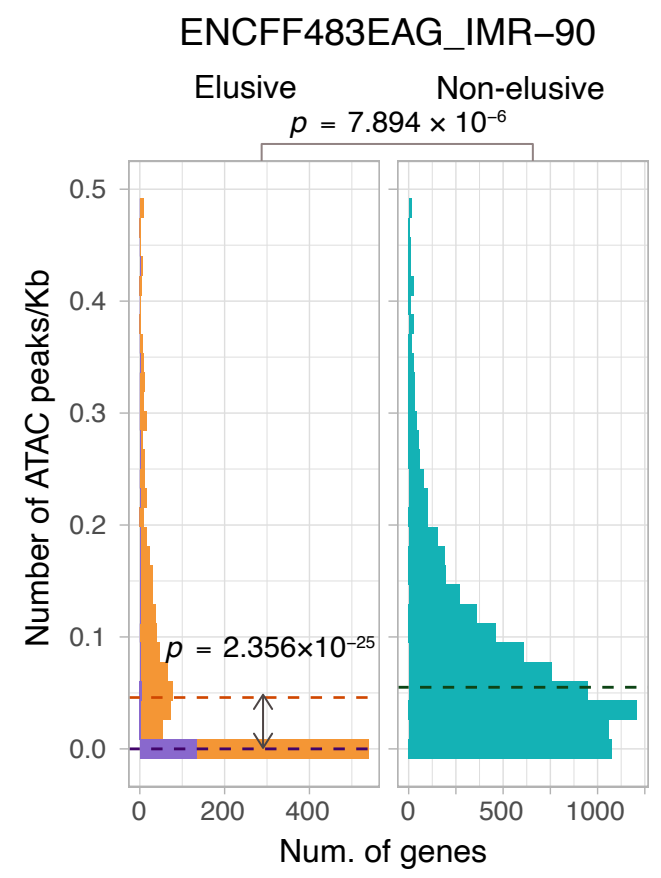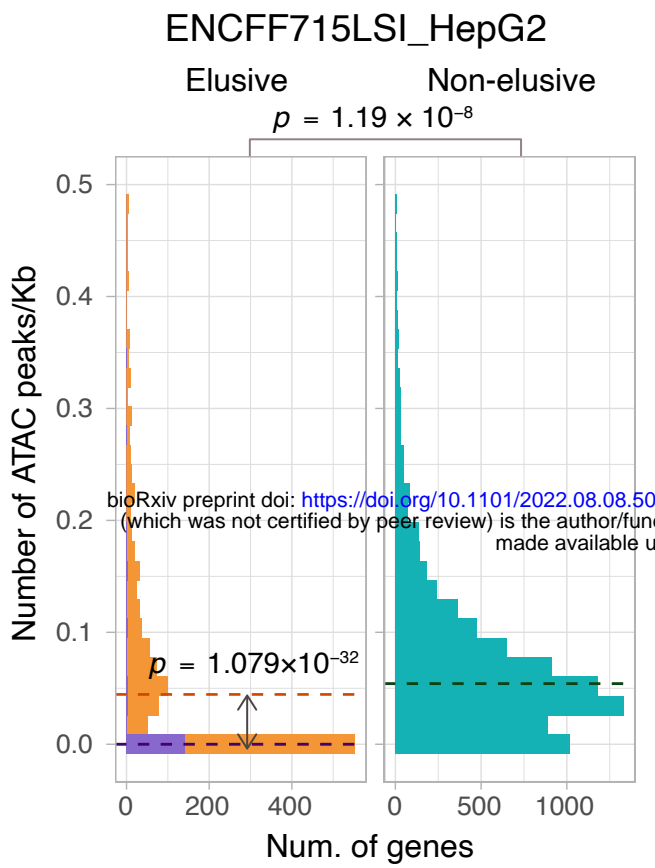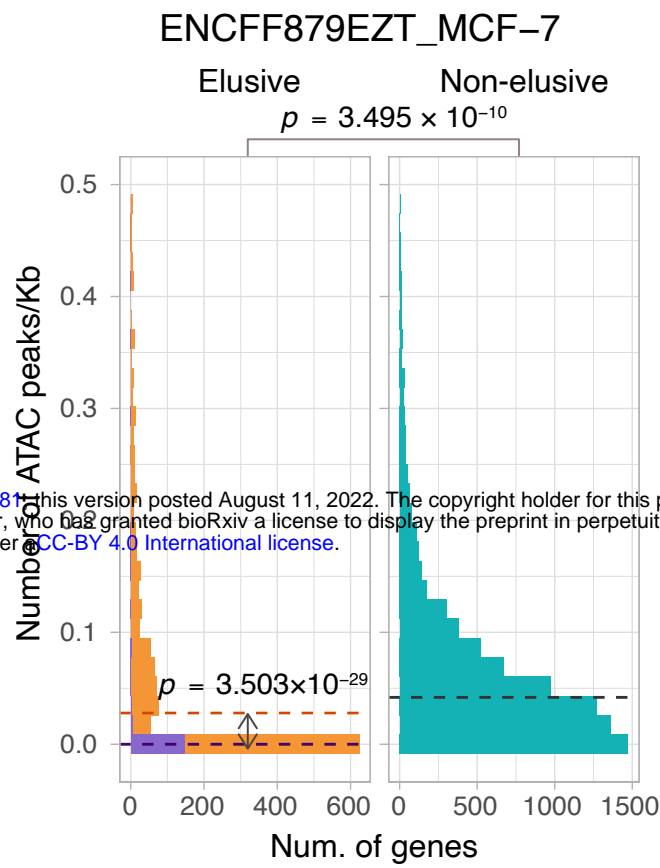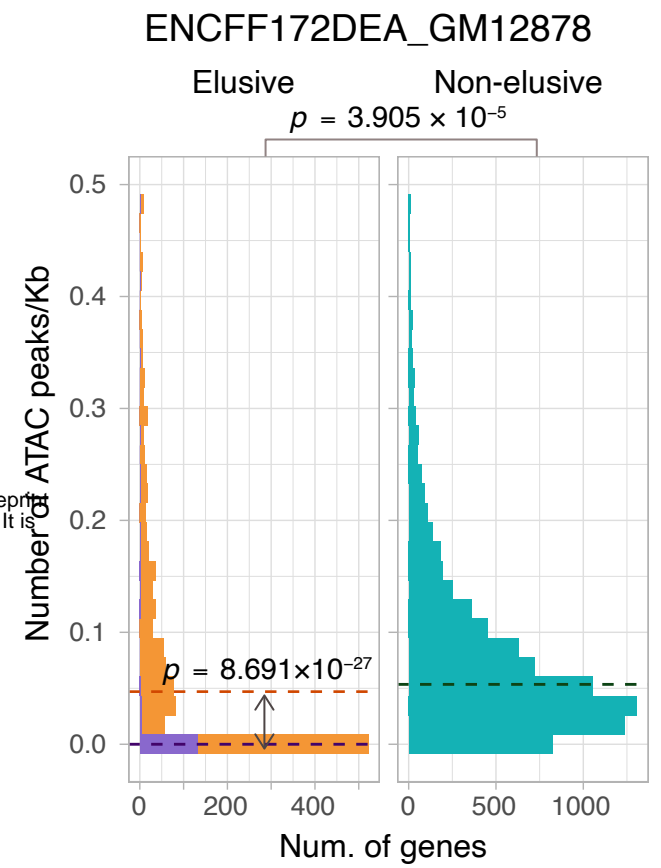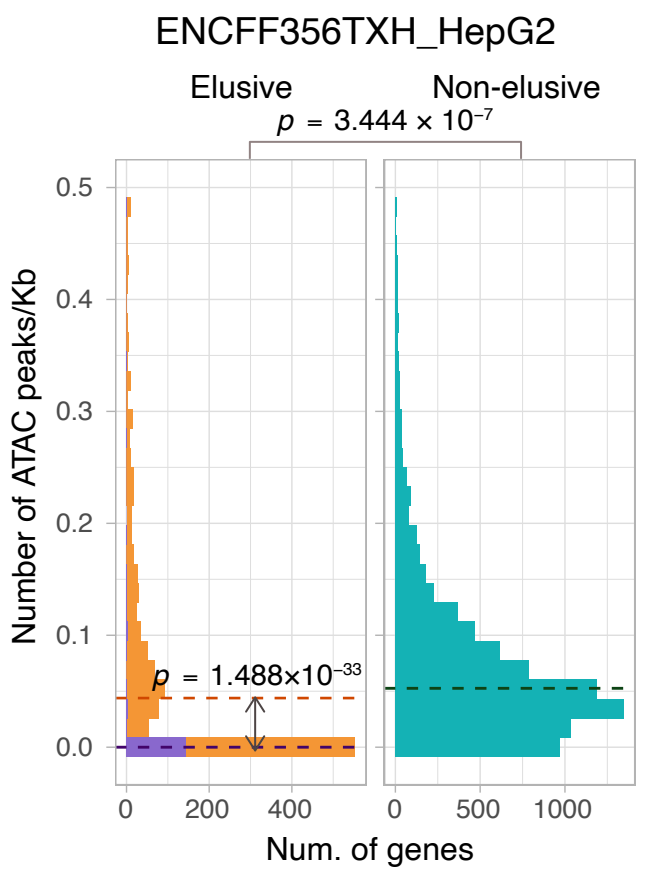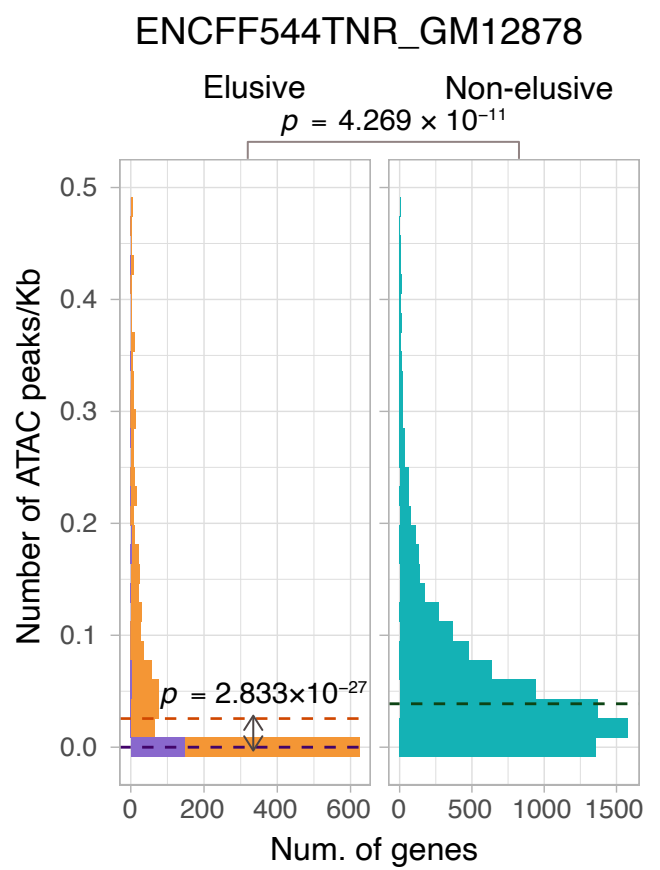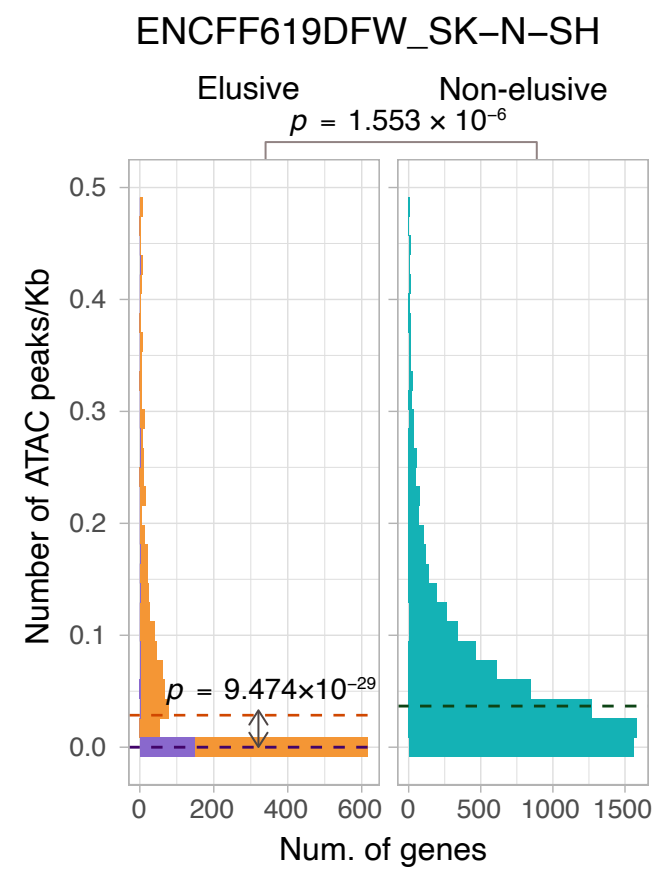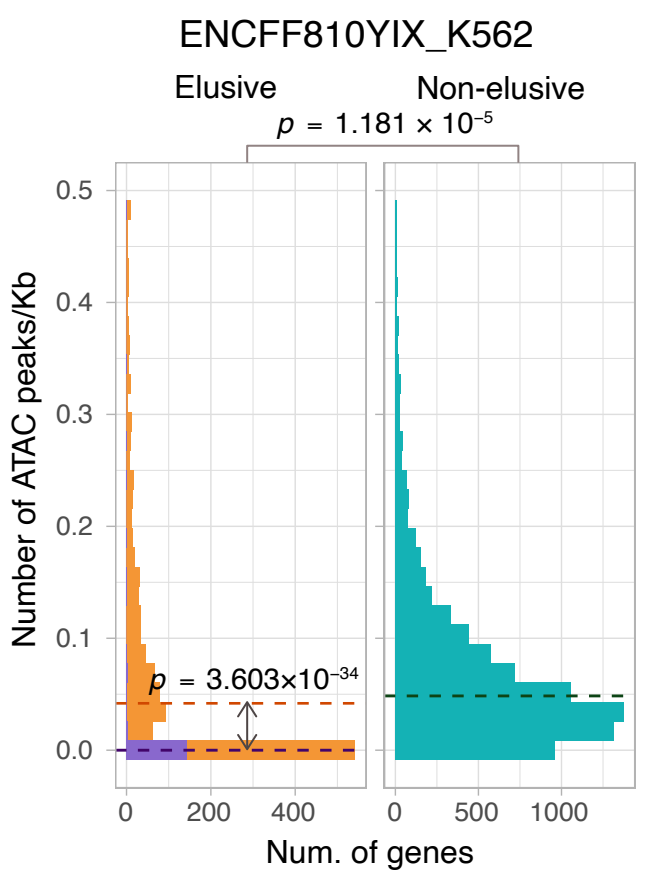

Figure 6-figure supplement 1

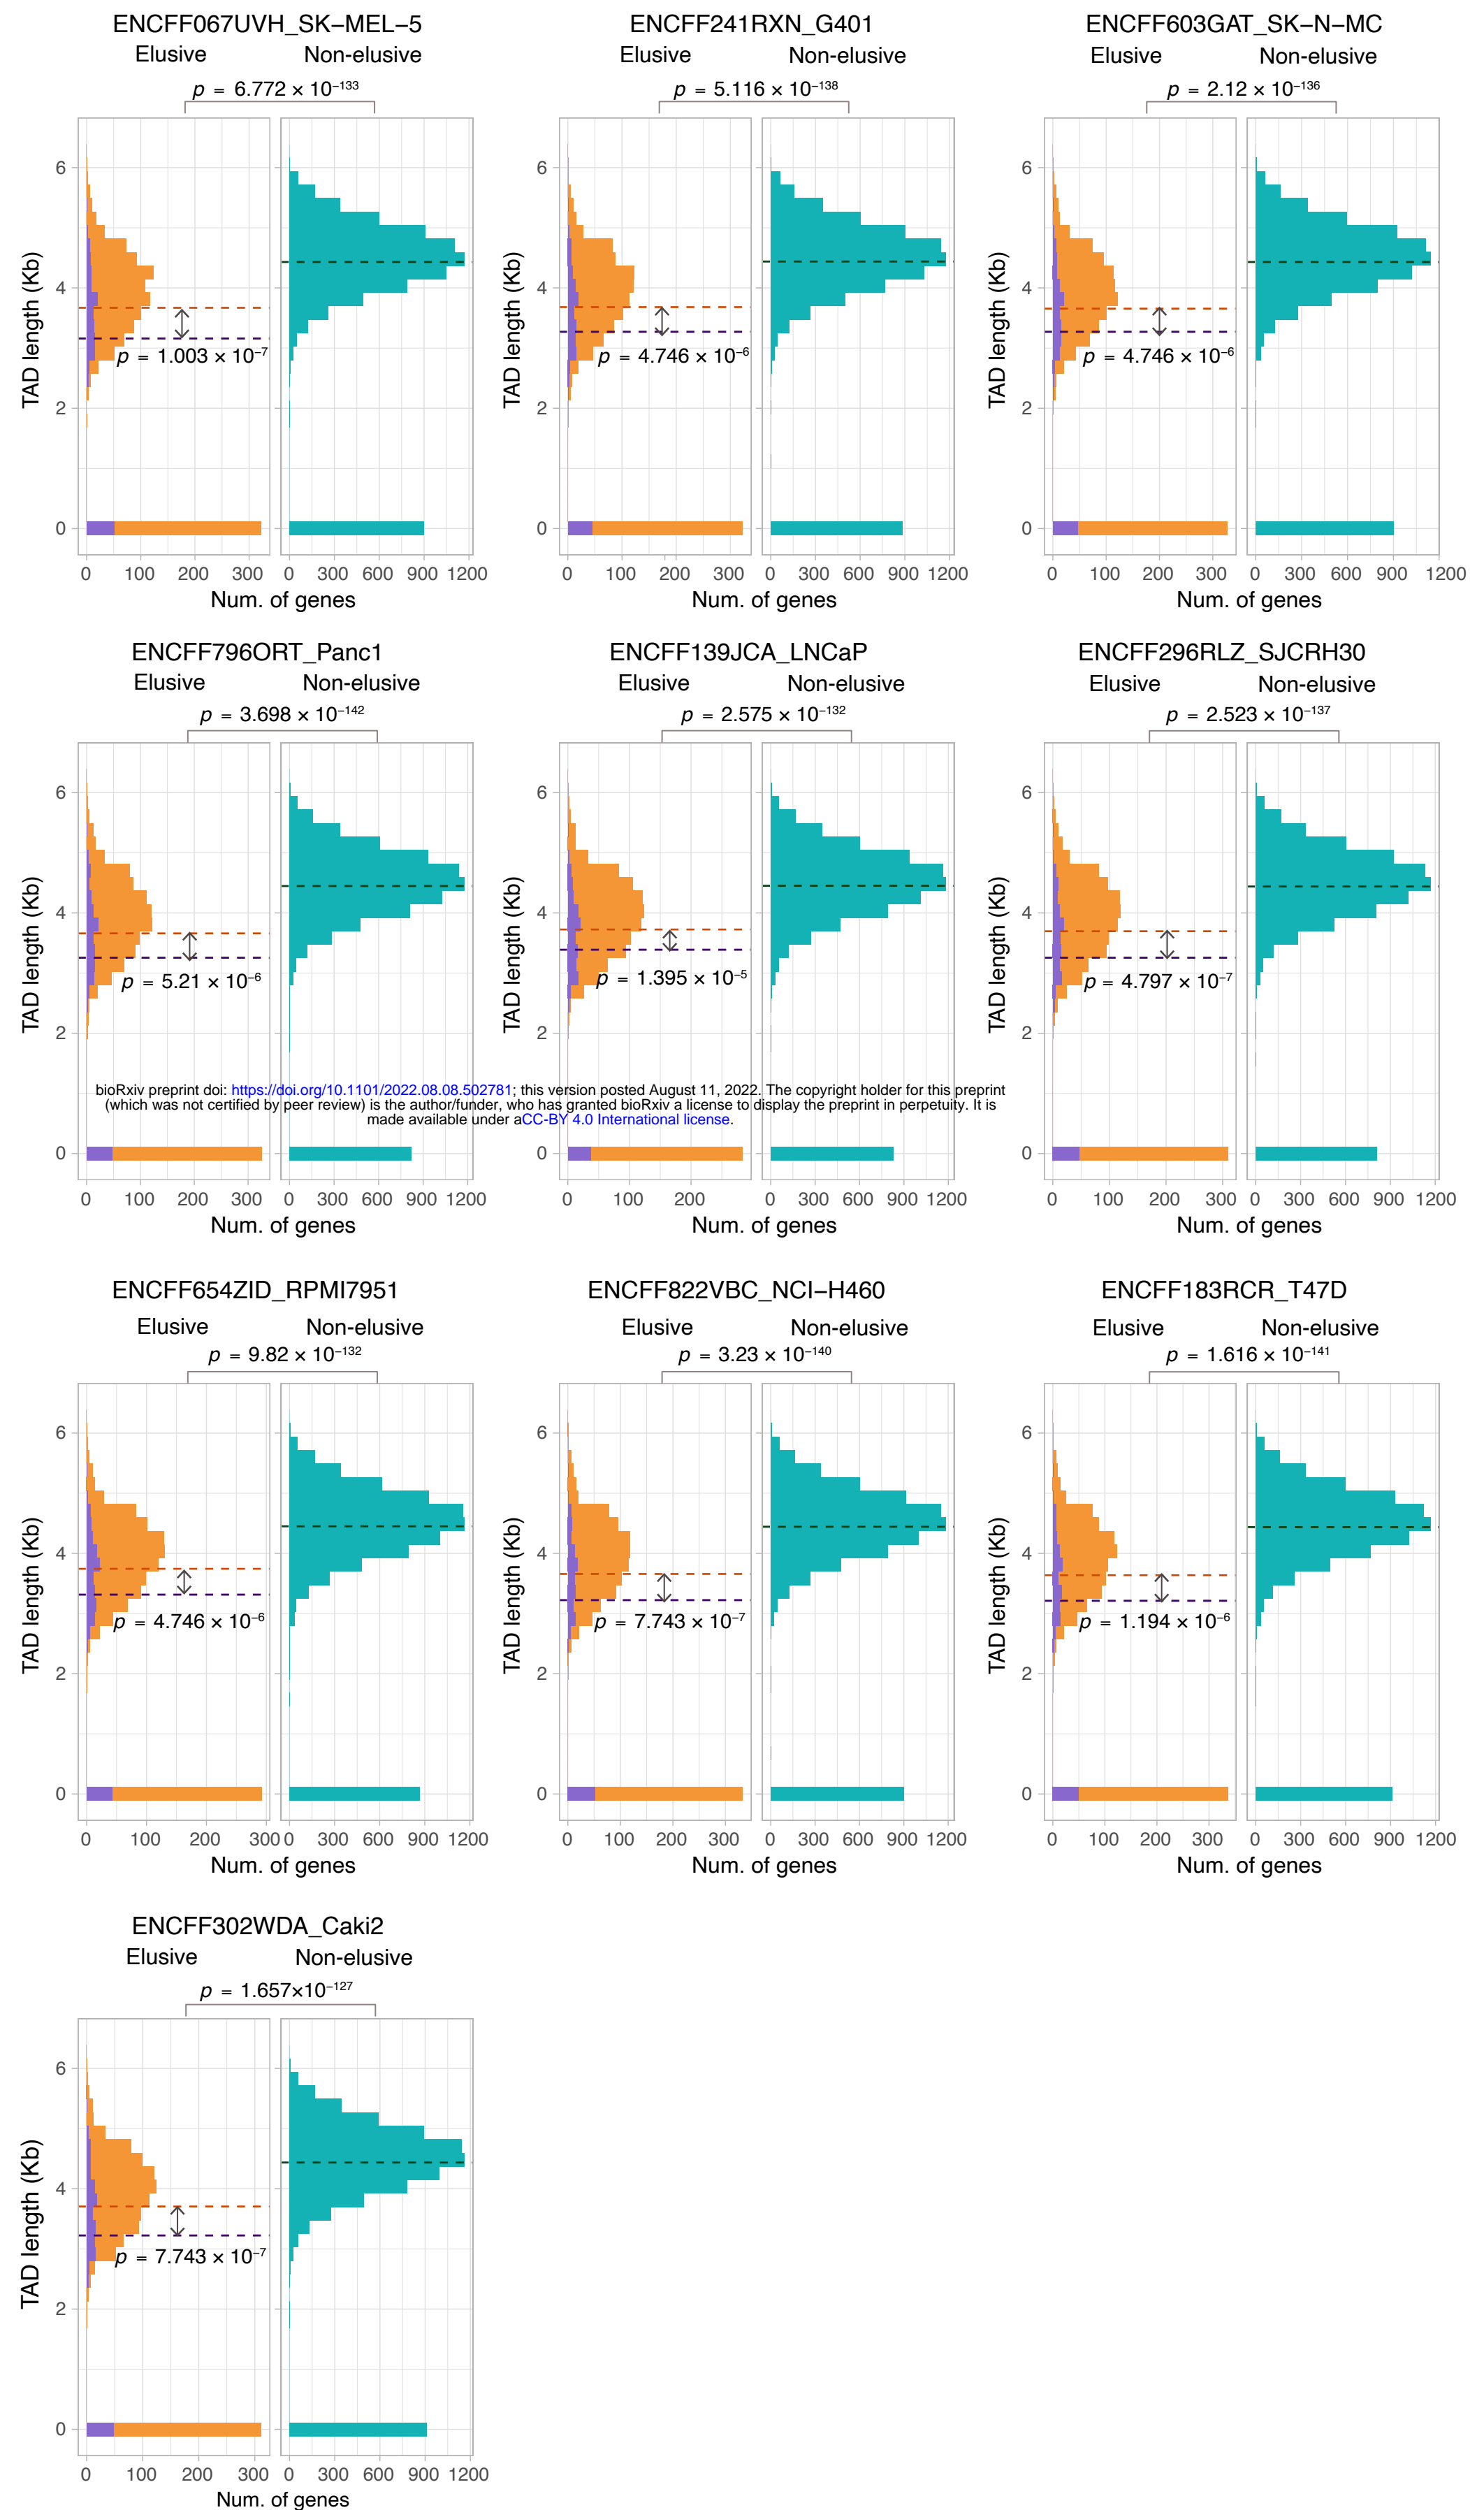

Figure 6-figure supplement 2

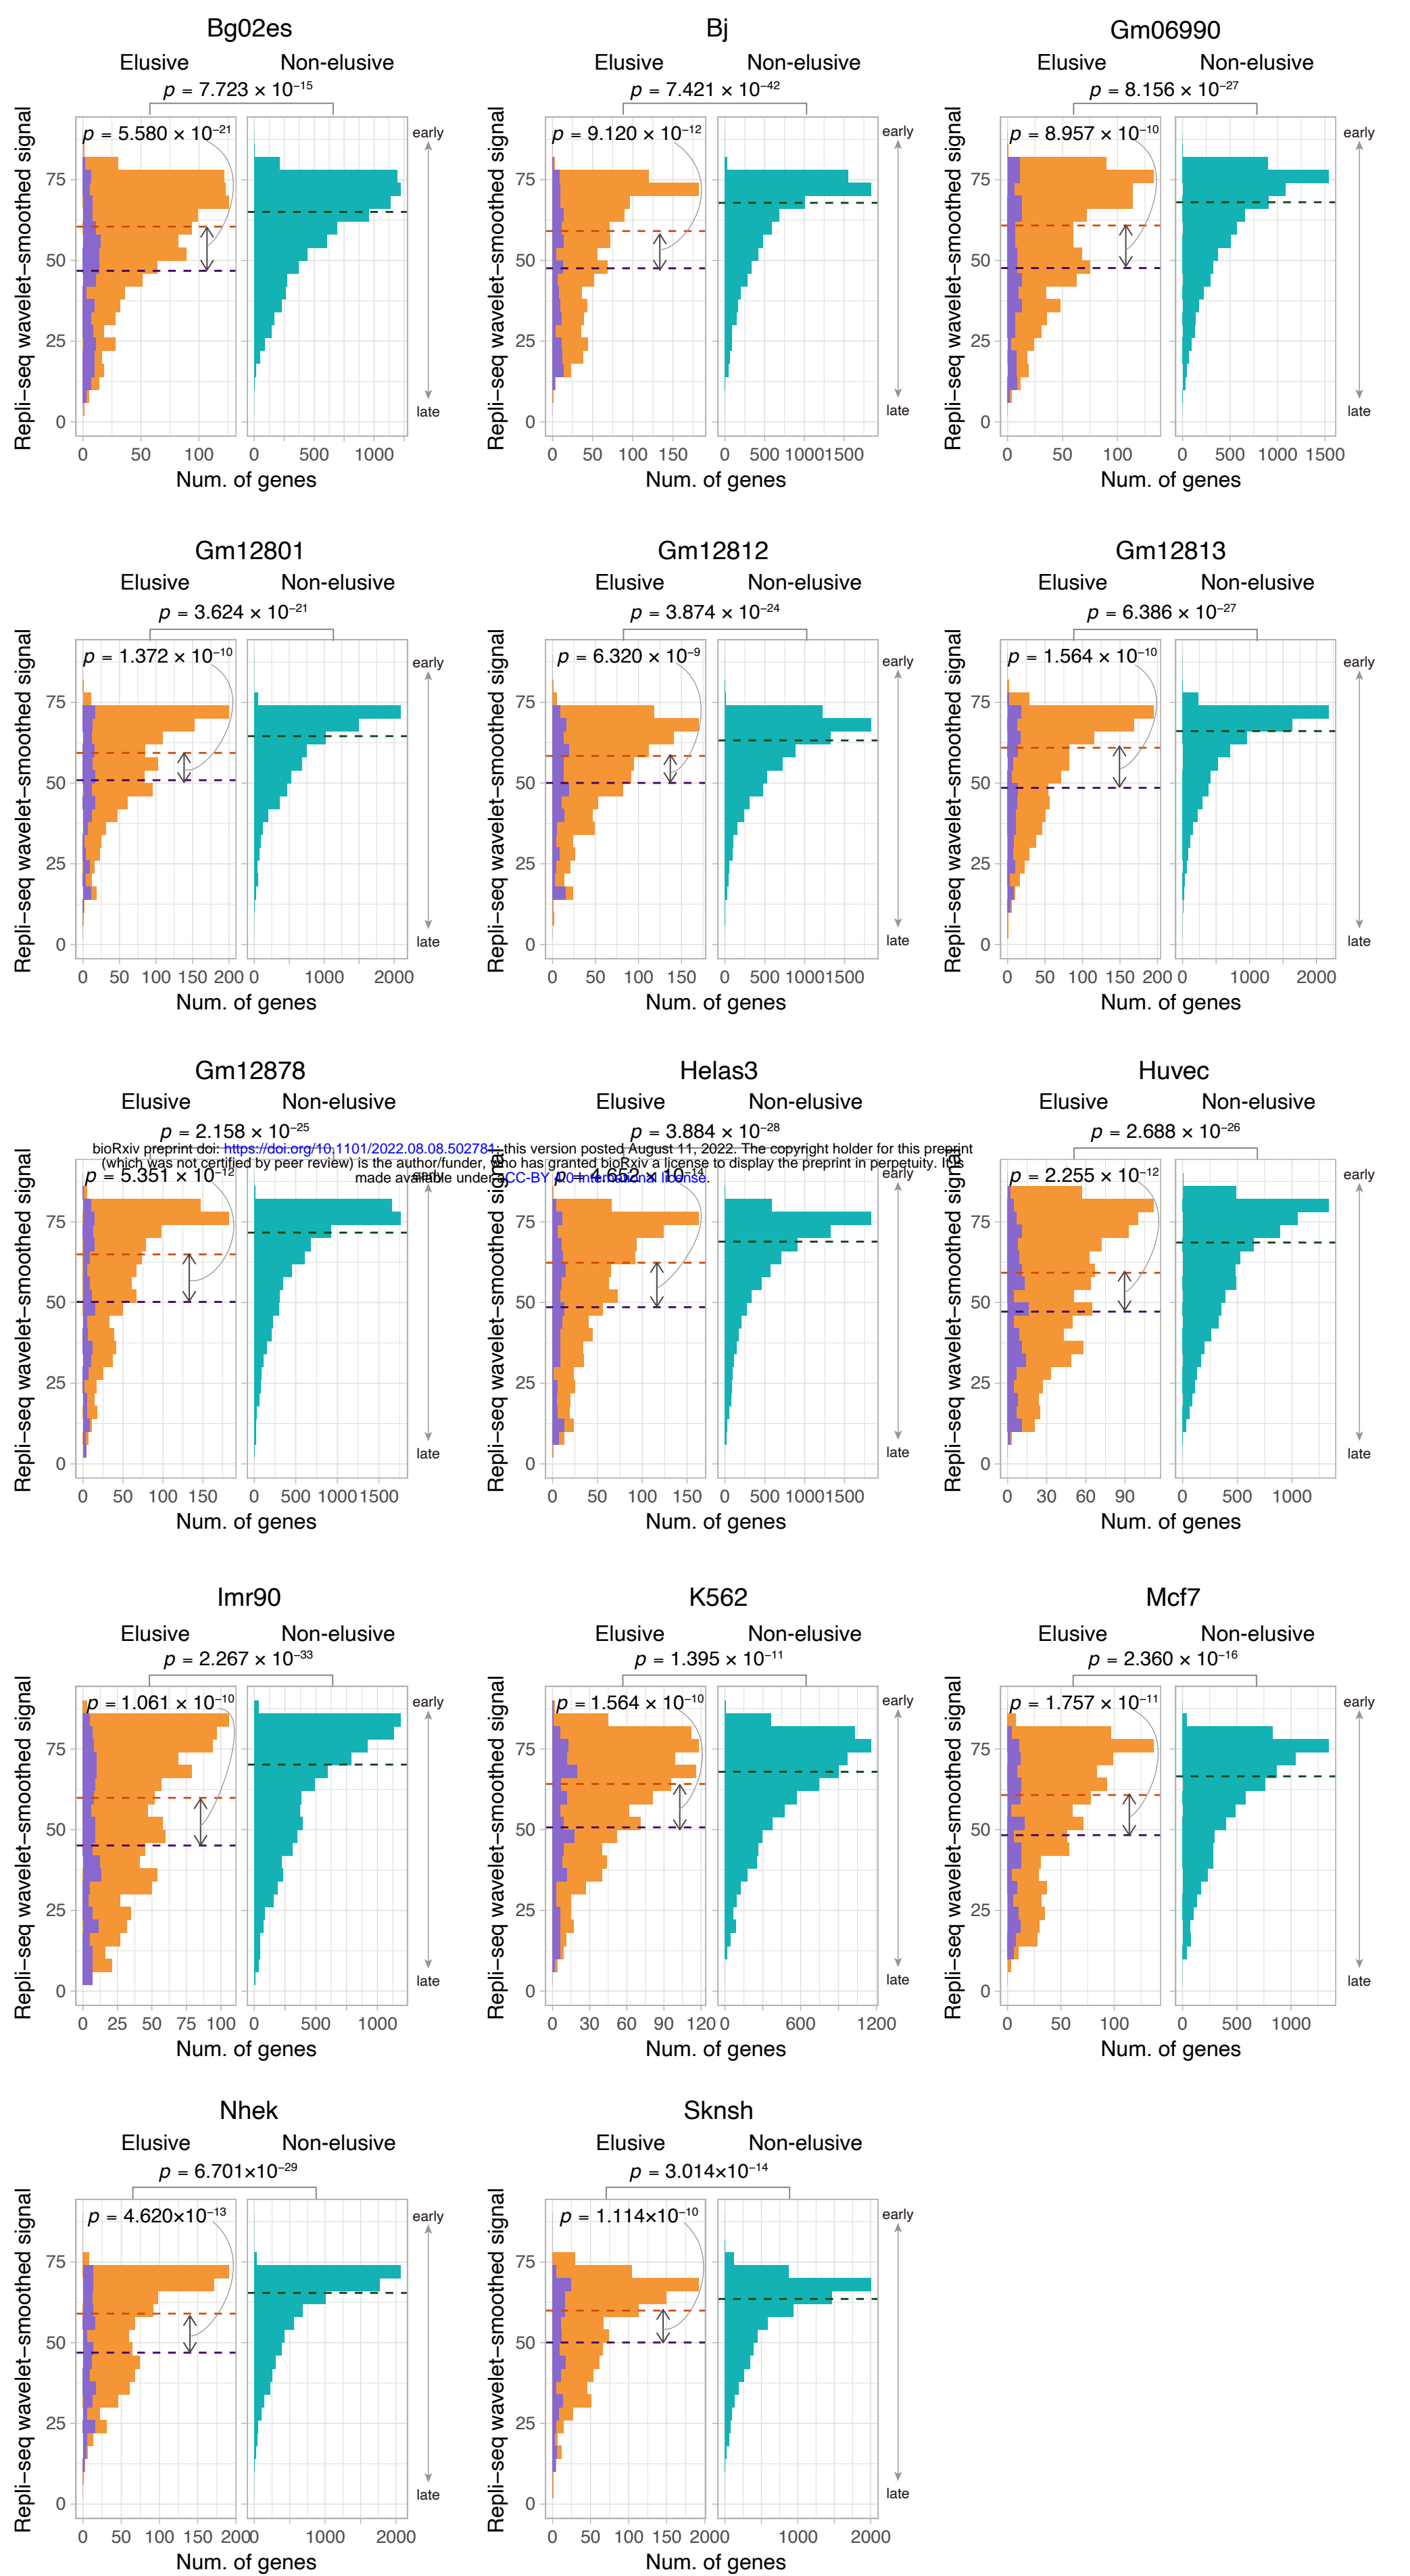

**Figure 6–figure supplement 3**

4DNFI4VAK5M4\_HAP-1

Elusive gene

Non-elusive gene

$p = 1.045 \times 10^{-7}$

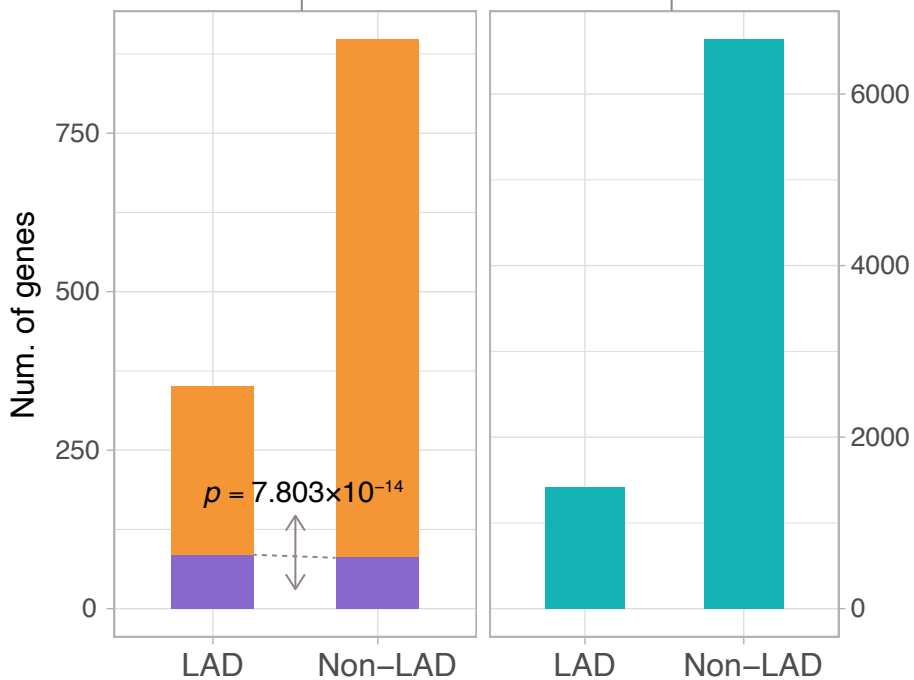

4DNFIMEVCZCO\_K562

Elusive gene

Non-elusive gene

$p = 0.004319$

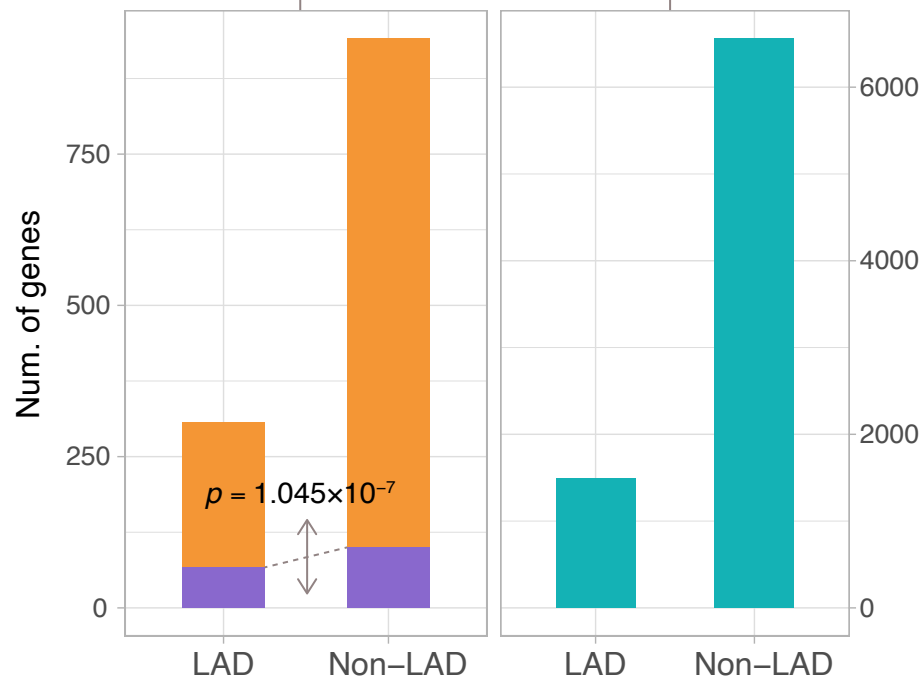

4DNFIY3SVVT2\_HCT116

Elusive gene

Non-elusive gene

$p = 1.148 \times 10^{-10}$

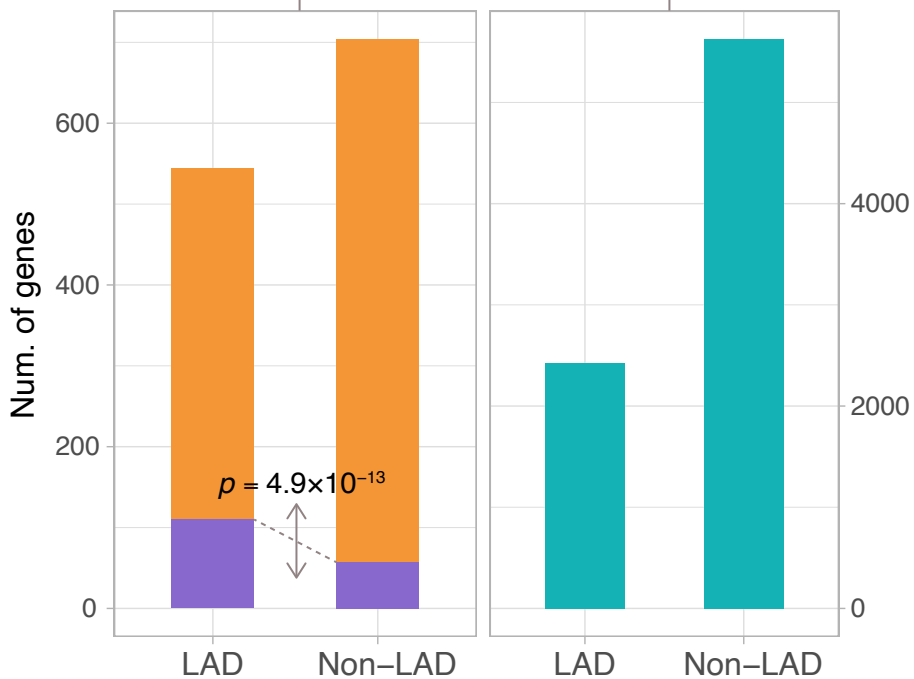

Figure 6—figure supplement 4

**a**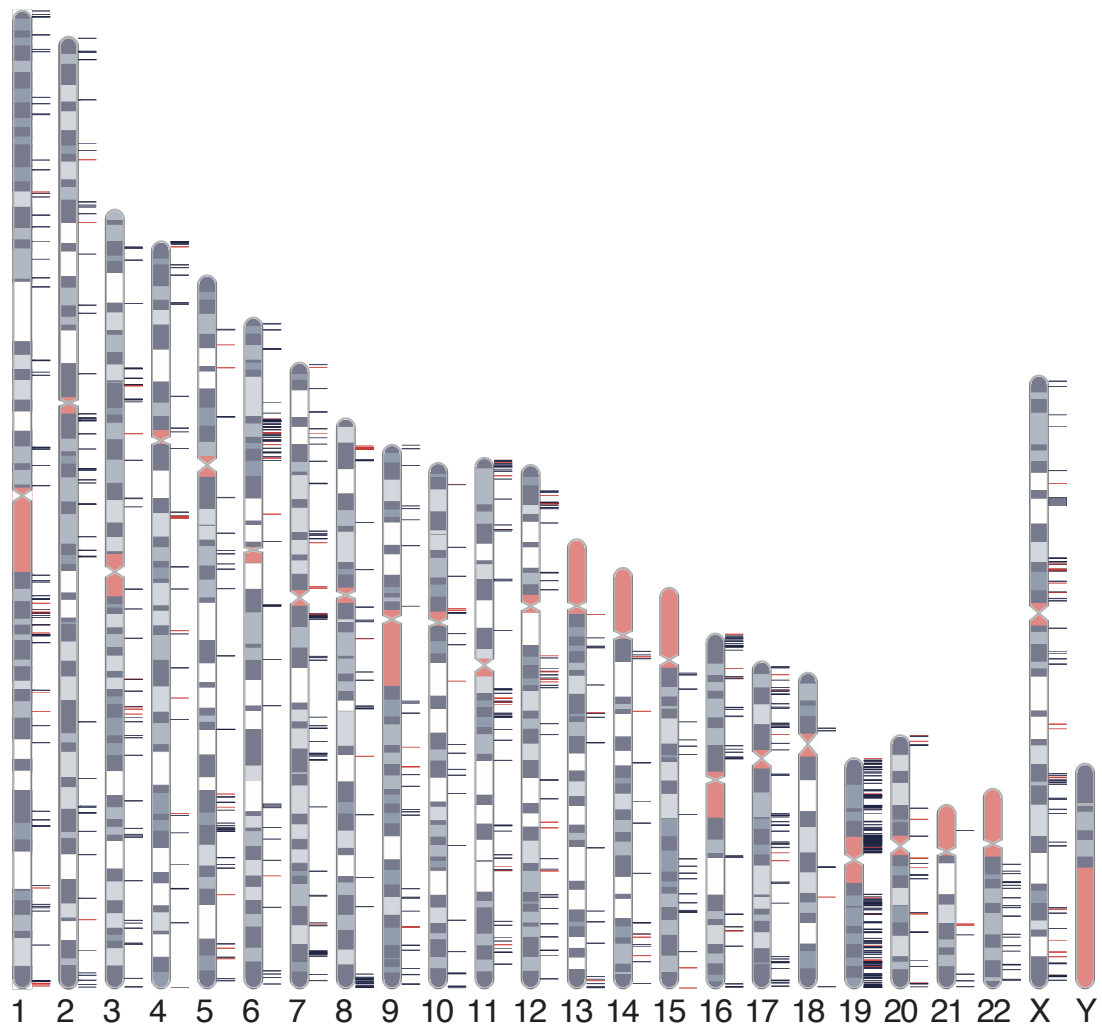**b**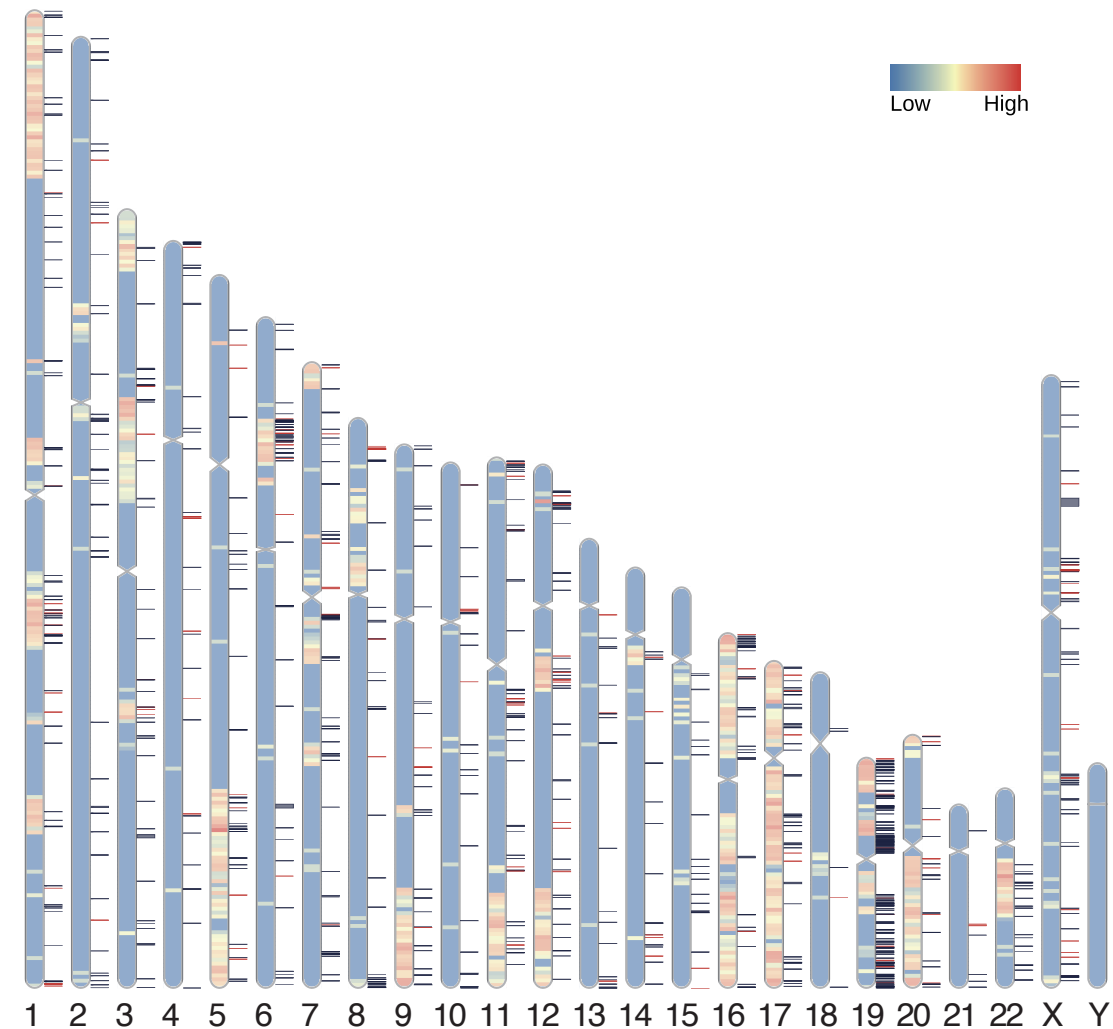**Figure 7–figure supplement 1**
